# Supplementary material for: Immune microenvironment heterogeneity reveals distinct subtypes in neuroblastoma: insights into prognosis and therapeutic targets
Source: Aging (Albany NY). 2023 Nov 27;15(22):13345–67. doi: 10.18632/aging.205246 (PMC10713432; doi:10.18632/aging.205246)
Supplement: Supplementary Table 1 [file aging-15-205246-s002.xlsx]

## Sheet: Sheet1
Supplementary Table 1. Summary of NB cohorts used in the present study.
Data	Source	Usage	SampleSize	Citation	Gender	Age (Year)	INSS	MYCN.Status
TARGET-NB	TARGET	Investigate TME of NB and as tranining set for deriving potential subtypes.	151		Male (88), Female (62), UNKNOWN (1)	0% 0; 25% 1.74; 50% 2.88; 75% 4.65; 100% 16.50	Stage 2b (1); Stage 3 (9) Stage 4 (120); Stage 4s (20)	NA (1); Not Amplified (119); Amplified (30)
GSE49710	GEO	Validation of Fges-derived NB subtypes	498	Wang C et al., (2014, Nat Biotechnol)	Male (287), Female (211)	0% 0; 25% 0.53; 50% 1.42; 75% 2.9; 100% 19.45	Satge 1 (121); Stage 2 (78); Stage 3 (63); Stage 4 (183); Satge 4S (53)	NA (5); Not Amplified (401); Amplified (92)
GSE85047			283	Rajbhandari P et al., (2018, Cancer Discov)		0% 0; 25% 0.45; 50% 1.22; 75% 2.76; 100% 24.61	NA (3); Stage 1(50); Stage 2 (36); Stage 3 (43); Stage 4 (124); Stage 4s (27)	NA (6); Not Amplified (222); Amplified (55)
