# Supplementary material for: Immune microenvironment heterogeneity reveals distinct subtypes in neuroblastoma: insights into prognosis and therapeutic targets
Source: Aging (Albany NY). 2023 Nov 27;15(22):13345–67. doi: 10.18632/aging.205246 (PMC10713432; doi:10.18632/aging.205246)
Supplement: Supplementary Table 2 [file aging-15-205246-s003.xlsx]

## Sheet: Sheet1
Supplementary Table 2. List of knowledge-based functional gene expression signatures (Fges).
MHCI	MHCII	Coactivation_molecules	Effector_cells	T_cell_traffic	NK_cells	T_cells	B_cells	M1_signatures	Th1_signature	Antitumor_cytokines	Checkpoint_inhibition	Treg	T_reg_traffic	Neutrophil_signature	Granulocyte_traffic	MDSC	MDSC_traffic	Macrophages	Macrophage_DC_traffic	Th2_signature	Protumor_cytokines	CAF	Matrix	Matrix_remodeling	Angiogenesis	Endothelium	Proliferation_rate	EMT_signature
HLA-A	HLA-DRA	CD28	IFNG	CXCL9	NKG7	TBX21	CD19	NOS2	IFNG	TNF	PDCD1	FOXP3	CCL17	MPO	CXCL8	IDO1	CSF2	IL10	CCL2	IL4	IL10	COL1A1	FN1	CA9	VEGFA	NOS3	MKI67	SNAI1
HLA-B	HLA-DRB1	CD40	GZMA	CXCL10	CD160	ITK	MS4A1	TNF	IL2	IFNB1	CD274	CTLA4	CCL22	ELANE	CXCL1	ARG1	CSF3	MRC1	CCL7	IL5	TGFB1	COL1A2	COL1A1	MMP9	VEGFB	KDR	ESCO2	SNAI2
HLA-C	HLA-DMA	TNFRSF4	GZMB	CXCL11	CD244	CD3D	TNFRSF13C	IL1B	CD40LG	IFNA2	CTLA4	IL10	CCL1	PRTN3	CXCL2	IL10	CXCL12	MSR1	CCL8	IL13	TGFB2	COL5A1	COL1A2	MMP2	VEGFC	FLT1	CETN3	TWIST1
B2M	HLA-DPA1	ICOS	PRF1	CX3CL1	NCR1	CD3E	CR2	SOCS3	IL21	CCL3	LAG3	TNFRSF18	CCL28	CTSG	CXCL5	CYBB	CCL26	CD163	XCL1	IL10	TGFB3	ACTA2	COL4A1	MMP1	PDGFC	VCAM1	CDK2	TWIST2
TAP1	HLA-DPB1	TNFRSF9	GZMK	CCL3	KLRC2	CD3G	TNFRSF17	CMKLR1	TBX21	TNFSF10	PDCD1LG2	CCR8	CCR4	CXCR1	CCL11	PTGS2	IL6	CSF1R	CCR2	CCR4	IL22	FGF2	COL3A1	MMP3	CXCL8	VWF	CCND1	ZEB1
TAP2	HLA-DMB	CD27	ZAP70	CCL4	KLRK1	TRAC	TNFRSF13B	IRF5	STAT4	IL21	BTLA	IKZF4	CCR8	CXCR2	KITLG	IL4I1	CXCL8	IL4I1	XCR1		MIF	FAP	VTN	MMP12	CXCR2	CDH5	CCNE1	ZEB2
NLRC5	HLA-DQB1	CD80	GNLY	CX3CR1	CD226	TRBC1	CD22	IL12A	IL12RB2		HAVCR2	IKZF2	CCR10	FCGR3B	CXCR1	IL6	CXCL5	SIGLEC1	CSF1R		IL6	LRP1	LGALS7	MMP7	FLT1	MMRN1	AURKA	CDH2
TAPBP	HLA-DQA1	CD86	FASLG	CCL5	GZMH	TRBC2	CD79A	IL12B			TIGIT			CD177	CXCR2		CSF1R	CD68	CSF1			CD248	LGALS9	MMP11	PGF	ENG	AURKB
	CIITA	CD40LG	TBX21	CXCR3	GNLY	CD28	CD79B	IL23A			VSIR			FFAR2	CCR3		CSF2RA					COL6A1	LAMA3	PLOD2	CXCL5	CLEC14A	E2F1
		CD83	EOMES		IFNG	CD5	BLK							PGLYRP1			CSF3R					COL6A2	LAMB3	ADAMTS4	KDR	MMRN2	MYBL2
		TNFSF4	CD8A		KIR2DL4	TRAT1	FCRL5										CXCR4					COL6A3	LAMC2	ADAMTS5	ANGPT1		BUB1
		ICOSLG	CD8B		EOMES		PAX5										IL6R					CXCL12	TNC	LOX	ANGPT2		PLK1
		TNFSF9			GZMB		STAP1										CXCR2					FBLN1	ELN		TEK		CCNB1
		CD70			FGFBP2												CCL15					LUM	COL5A1		VWF		MCM2
					KLRF1												CSF1					MFAP5	COL11A1		CDH5		MCM6
					SH2D1B																	MMP3
					NCR3																	MMP2
																						PDGFRB
																						PDGFRA
