# Supplementary material for: Immune microenvironment heterogeneity reveals distinct subtypes in neuroblastoma: insights into prognosis and therapeutic targets
Source: Aging (Albany NY). 2023 Nov 27;15(22):13345–67. doi: 10.18632/aging.205246 (PMC10713432; doi:10.18632/aging.205246)
Supplement: Supplementary Table 3 [file aging-15-205246-s004.xlsx]

## Sheet: Sheet 1
Supplementary Table 3. Activity score of Fges in TARGET-NB cohort.
	MHCI	MHCII	Coactivation_molecules	Effector_cells	T_cell_traffic	NK_cells	T_cells	B_cells	M1_signatures	Th1_signature	Antitumor_cytokines	Checkpoint_inhibition	Treg	T_reg_traffic	Neutrophil_signature	Granulocyte_traffic	MDSC	MDSC_traffic	Macrophages	Macrophage_DC_traffic	Th2_signature	Protumor_cytokines	CAF	Matrix	Matrix_remodeling	Angiogenesis	Endothelium	Proliferation_rate	EMT_signature
TARGET-30-PAPVFD-01A	-0.278607	0.33051	-0.0350157	0.50758	-0.513592	0.389708	0.765009	0.577697	-0.194449	0.452629	-0.534773	0.520092	0.533994	0.642855	-0.794962	-0.670819	-0.326738	-0.567802	-0.572666	-0.41392	0.318134	-0.763735	-0.816629	-0.573619	-0.594676	-0.784784	-0.783084	0.0627891	-0.316141
TARGET-30-PARACS-01A	0.433618	-0.0359786	0.333824	0.69371	0.669551	0.710587	0.671745	0.529535	0.485537	0.577375	0.386881	0.483031	0.779044	0.661325	-0.325367	-0.476058	0.621925	-0.186361	-0.184893	0.371455	0.0366103	0.379976	-0.307051	-0.334487	0.249666	0.305517	0.636211	-0.520273	-0.187575
TARGET-30-PAPHPE-01A	-0.635228	-0.00697476	-0.270381	-0.274961	-0.60664	-0.380256	-0.443771	-0.642966	-0.314239	-0.399699	-0.601027	0.0142674	-0.240727	-0.0953312	-0.459277	-0.339799	-0.413258	-0.356689	0.0764902	-0.485728	0.0878162	-0.689968	-0.736261	-0.671131	-0.779706	-0.664476	-0.715955	-0.829665	-0.669838
TARGET-30-PAPTAN-01A	0.532615	0.489886	0.265947	0.22059	0.523343	0.0442915	0.0610348	-0.616586	0.470162	0.531823	0.718552	0.178121	0.0728248	0.0630163	0.128016	0.705604	0.42162	0.62854	-0.197648	0.146632	0.27085	0.636833	0.684176	0.422595	0.566302	0.477026	0.630428	-0.741396	0.534907
TARGET-30-PASEGA-01A	0.196939	-0.119187	-0.23787	0.56332	0.2058	0.31058	0.21535	-0.551099	-0.380385	0.410156	-0.799017	0.0322622	-0.151193	-0.393138	-0.210314	-0.378142	-0.559308	-0.227879	-0.413271	0.0181341	0.247324	0.268355	-0.327829	-0.616062	-0.102732	0.105491	-0.0325146	0.0590991	-0.415738
TARGET-30-PAPZYP-01A	0.0163195	0.414464	0.308668	-0.108187	0.613848	0.112301	-0.0107937	0.252777	0.459028	0.00323653	0.21027	0.259801	-0.192472	-0.473416	0.775493	0.722768	0.557789	0.679009	0.697526	0.595451	-0.0239384	0.64092	0.738212	0.494113	0.439434	0.600838	0.607305	0.590231	0.65391
TARGET-30-PANLET-01A	0.0356884	0.0377905	0.116309	0.612537	0.224994	0.509559	0.751857	0.740597	-0.456138	0.579318	0.0103275	0.366436	0.252185	0.547305	-0.466723	-0.35061	-0.31206	-0.34475	-0.634521	0.178664	-0.237441	-0.717639	-0.620547	-0.611083	-0.660429	-0.441763	-0.757787	0.531202	-0.490935
TARGET-30-PATAYJ-01A	0.236392	0.428752	0.0691498	0.596462	-0.0221113	0.558536	0.724579	0.450593	-0.151521	0.485213	-0.126981	0.573587	0.408535	0.452638	-0.0754511	-0.114228	-0.0515871	-0.287388	-0.653271	0.168541	-0.159511	-0.540158	-0.0605552	0.2152	-0.491314	-0.0215938	0.395201	-0.0462943	0.0326222
TARGET-30-PANNMS-01A	0.342835	0.453845	0.386973	0.60046	0.296854	0.278866	0.853415	0.714625	0.417822	-0.0254526	0.418331	0.342547	0.34133	0.554401	-0.548711	-0.272621	0.53969	-0.084299	0.249548	0.300193	-0.530705	-0.210815	-0.420237	-0.340217	0.292177	0.205861	0.493776	0.717055	-0.27913
TARGET-30-PARDCK-01A	0.256668	0.261072	0.0401836	-0.416814	-0.107815	-0.229555	-0.304118	-0.520304	-0.448283	-0.0716049	-0.248697	0.150958	-0.0455587	0.111723	-0.293248	-0.594989	-0.440689	-0.473972	-0.179595	-0.234179	0.101771	-0.44601	-0.682796	-0.292046	-0.21726	-0.151073	-0.297738	-0.819741	-0.712069
TARGET-30-PATDXG-01A	-0.797899	-0.824	-0.656734	-0.531656	-0.241958	-0.476036	-0.544411	-0.487869	-0.575744	-0.367842	-0.625296	-0.630471	-0.590521	-0.694045	-0.546653	-0.523472	-0.679603	-0.463436	-0.678068	-0.530263	-0.248052	-0.382945	-0.315572	-0.601969	0.0211238	-0.589916	-0.690031	0.62777	0.0411067
TARGET-30-PAIFXV-01A	0.413757	0.71581	0.326174	0.404145	0.634164	0.510316	0.400927	-0.46535	0.475806	0.552424	0.66799	0.211503	0.401376	0.3619	0.0677465	0.17746	0.316018	0.515241	0.477443	0.547785	0.480222	0.705087	-0.400778	-0.557046	-0.465699	-0.30429	-0.132526	-0.872628	-0.00858585
TARGET-30-PATYIL-02A	-0.1351	0.0855145	-0.119892	-0.783612	-0.402006	-0.589914	-0.795101	-0.569131	-0.169712	-0.673701	0.485965	-0.297472	-0.399421	-0.613825	-0.629875	0.247455	-0.113026	-0.228613	0.218734	-0.500648	-0.57818	0.363697	0.228535	-0.102486	0.591478	0.0653492	-0.0319083	0.730094	0.549188
TARGET-30-PARBAJ-02A	0.643193	0.472685	-0.324112	-0.593338	-0.260536	-0.406699	-0.575999	-0.532029	-0.101317	-0.608007	0.562299	-0.191339	-0.399085	-0.489727	-0.312773	-0.365678	0.21566	0.201357	0.546328	-0.0100031	-0.62113	0.54012	0.664242	0.700026	0.27051	0.286282	-0.0458589	-0.710206	0.216451
TARGET-30-PAPUWY-01A	0.820435	0.800308	0.59848	0.92869	0.851858	0.887627	0.851335	0.636761	0.590405	0.931492	0.771187	0.890616	0.549315	0.745332	-0.115153	0.609258	0.453007	0.484091	0.723387	0.756486	0.117896	-0.388909	-0.452872	-0.240631	-0.35718	0.293079	0.680893	0.688342	0.295331
TARGET-30-PASGAP-01A	0.744149	0.776282	0.48758	0.648	0.675121	0.418966	0.728045	0.172482	0.418504	0.145571	0.148825	0.632418	0.0392945	0.13335	0.475676	0.390742	0.490433	0.594943	0.782624	0.730235	0.102701	0.52538	0.243537	-0.0121533	-0.328081	0.0962851	0.151887	-0.761715	0.219102
TARGET-30-PAITCI-01A	-0.198062	0.269295	0.288396	0.316317	-0.270536	-0.129714	0.329357	-0.0605943	0.045911	-0.108982	0.264629	0.176511	-0.144542	0.272684	0.074843	-0.0323702	0.311015	0.48382	0.588257	0.135013	0.45909	0.306527	0.540739	0.42378	0.355534	-0.131745	-0.325274	-0.0925826	0.173787
TARGET-30-PATFCY-01A	0.0773007	-0.664489	-0.606921	-0.190195	-0.628559	-0.260877	-0.439442	0.349998	-0.513444	-0.498768	-0.544867	-0.55014	-0.64716	-0.541737	-0.318677	-0.741507	-0.679557	-0.609536	-0.64858	-0.762199	-0.257456	-0.198689	-0.320104	0.0600666	-0.188409	-0.0674245	0.303487	0.401961	-0.425653
TARGET-30-PALKUC-01A	0.511121	0.43691	0.2743	-0.536361	-0.0937789	-0.442203	-0.332153	-0.0785549	0.469126	-0.0828961	0.571351	-0.280557	-0.606764	-0.0878393	0.598838	0.559201	0.029146	0.602202	0.343829	0.248043	-0.124381	0.669608	0.862731	0.779044	0.671245	0.580521	0.682184	-0.08148	0.350206
TARGET-30-PARZCJ-01A	0.895163	0.754835	0.700137	0.583346	0.663906	0.605027	0.312478	0.0347067	0.743945	0.6648	0.685365	0.680598	0.605891	0.415844	0.359497	0.536559	0.64651	0.577446	0.892661	0.719004	0.62935	0.293392	0.569888	0.556285	0.512291	0.583491	0.808834	-0.580986	0.341464
TARGET-30-PARFWB-01A	-0.68587	0.0946032	0.266455	0.172937	0.232273	-0.0710278	0.532254	0.69499	-0.244567	-0.35818	-0.0271276	0.420723	0.542001	0.599294	-0.139283	-0.272463	0.229595	0.0457264	0.285413	0.409121	0.10024	-0.496632	-0.663321	-0.579907	-0.309678	-0.284777	-0.624809	0.716165	-0.470883
TARGET-30-PATEKG-01A	0.821449	0.89248	0.413453	0.650756	0.75668	0.463971	0.379231	-0.378701	0.587283	0.116255	0.529803	0.394862	-0.132907	0.16075	0.0604917	0.318178	0.478334	0.589896	0.738041	0.681842	0.323565	0.198932	0.0914517	0.253227	-0.62332	-0.0294842	0.29649	-0.869586	0.110202
TARGET-30-PAKZRH-01A	-0.349368	-0.492885	-0.319749	-0.552591	-0.609063	-0.41142	-0.384207	-0.612451	-0.643405	-0.586335	0.328643	-0.434249	-0.342674	-0.462212	0.523493	0.309614	-0.21431	0.0784849	0.346905	-0.064749	-0.626401	-0.0574473	-0.424579	0.0157518	0.299122	0.356873	0.363727	-0.0683995	0.502171
TARGET-30-PASXRJ-01A	0.653116	0.847117	0.79149	0.792464	0.469716	0.746341	0.811859	0.96266	0.652997	0.664496	0.510168	0.742196	0.684091	0.82745	0.306112	0.111207	0.469448	0.323072	0.462282	0.34911	0.692882	-0.582483	-0.632522	-0.438865	-0.197709	-0.0238766	0.191163	-0.772914	-0.672345
TARGET-30-PASGAP-02A	0.698819	0.755956	0.612762	0.548668	0.806283	0.396745	0.620167	-0.173322	0.654798	0.631298	0.617725	0.659226	0.28968	0.377355	0.246398	0.544492	0.698614	0.575229	0.741812	0.763101	-0.0141747	0.781542	0.84718	0.562078	0.736772	0.607135	0.724084	0.550935	0.749199
TARGET-30-PASTCN-01A	-0.376441	-0.206689	0.188815	0.424998	-0.498983	0.317845	0.558837	0.569909	-0.39119	0.00650351	-0.124223	-0.0827041	0.423909	0.142615	-0.285541	0.0265241	-0.216394	-0.272029	-0.295524	-0.312884	-0.551818	-0.458875	0.187602	-0.284946	0.0429973	0.135304	-0.204328	0.527271	-0.258206
TARGET-30-PAPVXS-01A	0.861196	0.578851	0.648812	0.726525	0.854069	0.733216	0.5694	0.353249	0.527658	0.752627	0.914356	0.843293	0.471969	0.0957131	0.704258	0.594615	0.889556	0.577947	0.716012	0.530994	0.758597	0.604924	0.372846	-0.0724631	0.104873	0.217679	0.411771	0.394904	0.15371
TARGET-30-PAKYZS-01A	0.23509	0.245543	0.242481	-0.491898	-0.136169	-0.384155	-0.382536	-0.588039	0.00746617	-0.127412	0.317626	-0.201401	-0.225831	-0.138223	0.0502169	0.351156	0.134334	0.350438	0.408891	0.278828	-0.0320715	0.423156	0.327621	0.0855822	-0.32631	0.0215313	0.114823	-0.837693	0.385245
TARGET-30-PAPKWN-01A	0.623315	0.55338	0.607343	0.512239	0.583326	0.228462	0.473871	0.630637	0.466444	-0.209406	0.287915	0.491105	0.0344345	0.316902	0.109544	0.532434	0.682301	0.349895	0.742246	0.427393	0.0103965	0.700553	0.679033	0.696649	0.586456	0.568898	0.883513	0.3469	0.403461
TARGET-30-PAPEFE-01A	0.475362	0.582764	0.71934	0.49682	-0.147521	0.465237	0.776695	0.904194	0.350631	0.594175	0.026159	0.557831	0.416288	0.512259	-0.164339	-0.132369	0.274919	-0.000141322	-0.0813498	-0.0752124	0.0920918	0.384226	-0.38775	-0.216632	0.0926764	0.221673	0.354691	-0.106662	-0.220608
TARGET-30-PAUDDK-02A	-0.163786	0.720321	0.194914	0.573532	0.466188	0.3003	0.540509	0.0162528	0.0259365	0.42558	0.0189667	0.511324	0.686926	0.545076	-0.0376812	0.305507	0.549501	0.302911	0.385576	0.479635	0.0642008	-0.0163267	0.131508	0.294251	0.0294577	-0.0591084	0.414078	-0.624291	0.415754
TARGET-30-PANSBN-01A	0.743261	0.950162	0.534942	0.351773	0.71477	0.528104	0.310231	-0.372401	0.5455	0.466883	0.427352	0.461014	0.526508	0.209408	0.25019	0.61973	0.661618	0.648625	0.755642	0.712057	-0.0580426	0.305846	0.538134	0.231083	-0.194289	0.352291	0.379023	-0.862699	0.470838
TARGET-30-PATDWN-01A	-0.905217	-0.930941	-0.678091	-0.481096	-0.724198	-0.591525	-0.715056	-0.518963	-0.780716	-0.535764	-0.700815	-0.779283	-0.621265	-0.633956	-0.0940905	-0.199347	-0.694539	-0.659942	-0.900417	-0.64921	-0.514907	-0.363303	-0.652909	-0.593633	-0.279227	-0.37416	-0.575904	0.0137709	-0.0597524
TARGET-30-PATESI-01A	-0.758003	-0.887788	-0.743017	-0.820875	-0.777904	-0.666238	-0.86226	-0.566791	-0.750218	-0.666964	-0.725059	-0.712935	-0.673535	-0.692777	-0.593282	-0.717201	-0.750968	-0.699991	-0.876993	-0.760888	-0.0753263	-0.531194	-0.0459363	-0.405316	0.293534	-0.717671	-0.820791	0.659429	0.234201
TARGET-30-PARJVP-01A	-0.836105	-0.735666	-0.653427	-0.667821	-0.860885	-0.383989	-0.729249	-0.757068	-0.644032	-0.599035	-0.519394	-0.723841	-0.0973632	-0.484956	-0.697031	-0.711992	-0.559878	-0.67633	-0.669964	-0.513307	-0.369861	-0.72023	-0.418455	-0.052888	-0.619078	-0.554705	-0.653828	-0.286501	-0.145067
TARGET-30-PAISNS-01A	-0.0899402	-0.400197	-0.0491792	0.540934	0.369061	0.379383	0.547607	0.521687	-0.233454	0.368382	0.390762	0.178622	-0.481736	-0.253572	-0.207239	-0.0558931	0.0343411	0.218723	-0.40055	-0.404695	0.505722	0.242489	0.308189	-0.282933	0.0592877	0.289779	0.525277	0.730872	0.564017
TARGET-30-PAPUNH-01A	-0.824904	-0.749565	-0.529684	-0.178496	-0.490649	-0.300063	0.322238	0.570263	-0.459955	0.0816313	-0.689335	-0.439695	0.35586	-0.241278	0.0617309	0.00120784	-0.446859	-0.299705	-0.810718	-0.844855	-0.391195	-0.465756	-0.719868	-0.720504	-0.463244	-0.690216	-0.909326	0.320201	-0.542037
TARGET-30-PAMEZH-01A	0.640768	0.0623562	-0.251135	0.532732	0.406353	0.097371	0.293046	-0.103596	-0.279378	-0.312789	-0.124615	-0.144837	-0.251924	0.0946697	0.18618	-0.494539	-0.436357	-0.172431	0.227525	0.116471	0.0675899	0.144274	0.346233	0.500751	-0.244404	-0.289983	-0.176192	-0.354625	-0.452721
TARGET-30-PASNPG-01A	-0.266841	-0.318518	-0.529956	-0.681843	-0.499065	-0.482132	-0.761152	-0.70135	-0.521851	-0.46412	-0.0163879	-0.223306	0.115271	-0.199258	-0.272368	-0.0260897	-0.188383	-0.337488	0.470324	-0.0908455	0.00429675	-0.0904093	-0.0300314	-0.0838371	0.0647759	-0.115033	-0.395779	0.398969	0.00450695
TARGET-30-PAMMXF-01A	-0.765678	-0.929093	-0.747683	-0.609729	-0.787589	-0.648251	-0.662452	-0.304106	-0.583012	-0.489056	-0.690406	-0.718334	-0.752486	-0.558957	0.0253017	-0.054448	-0.618861	-0.577826	-0.701825	-0.693737	-0.485658	-0.0918035	-0.289092	-0.455631	0.205151	-0.361172	-0.632911	0.599851	-0.111447
TARGET-30-PARACM-01A	0.805453	0.766391	0.659773	0.886278	0.732167	0.773837	0.898819	0.800605	0.620373	0.816924	0.426742	0.784615	0.736606	0.51575	0.151281	0.0100884	0.561837	0.398091	0.790248	0.787448	0.339668	0.291108	0.40683	-0.0432411	-0.537534	-0.160313	0.456533	-0.518336	0.281539
TARGET-30-PASVRU-01A	-0.74022	-0.954619	-0.715435	-0.769359	-0.919065	-0.820007	-0.87293	-0.546484	-0.45437	-0.67057	-0.718002	-0.733708	-0.681617	-0.56689	-0.540771	-0.679784	-0.817263	-0.518547	-0.84692	-0.775978	-0.708493	-0.461745	-0.370114	-0.672141	-0.022899	-0.517973	-0.811788	0.602776	-0.393027
TARGET-30-PALUYS-01A	0.171104	0.473668	0.18314	0.580503	0.50048	0.360541	0.318144	-0.0181035	0.0858758	-0.0242778	-0.0257056	0.41	0.169163	0.00520633	-0.323817	-0.552407	-0.361581	-0.409178	0.0462054	-0.242442	-0.217641	-0.340697	-0.269485	-0.0200611	-0.013822	-0.026948	0.124652	0.543655	-0.600182
TARGET-30-PASFIC-01A	0.35111	0.0236887	-0.179197	0.399806	-0.115506	0.538968	0.190761	0.182823	0.241525	-0.366154	-0.390092	-0.217115	0.25821	-0.362899	0.646416	0.325933	0.11455	0.18829	0.394604	0.620802	0.326636	0.212677	0.708803	0.708064	0.168106	0.539599	0.792326	-0.83297	0.593049
TARGET-30-PARHAM-02A	0.142875	0.257006	-0.103509	-0.47952	-0.277608	-0.433178	-0.255929	-0.534129	-0.225995	-0.423701	-0.154943	-0.350869	-0.569197	0.211674	-0.0688019	-0.267515	-0.378544	-0.0861581	-0.0995528	0.150295	-0.113631	-0.181686	0.00845874	0.193997	-0.313668	-0.459949	-0.634039	-0.768991	0.234603
TARGET-30-PASZKE-01A	-0.857473	-0.865849	-0.796987	-0.733803	-0.762662	-0.649829	-0.8595	-0.701641	-0.755752	-0.396417	-0.632845	-0.783095	-0.655591	-0.540966	-0.102218	-0.0392148	-0.662356	-0.426126	-0.729496	-0.694976	-0.136284	-0.629032	-0.0103363	0.30583	0.100122	-0.549337	-0.833146	-0.815463	-0.464795
TARGET-30-PASPER-01A	0.0104146	-0.428703	-0.17537	-0.284459	0.479387	0.0867526	-0.533806	-0.244271	-0.253107	-0.248751	0.00639607	0.00243468	-0.0210322	0.34013	-0.401921	-0.485136	-0.490326	-0.487547	-0.66034	0.199529	-0.233408	-0.396038	-0.766212	-0.704487	-0.624328	-0.396454	-0.491578	-0.782247	-0.729307
TARGET-30-PASCTR-01A	-0.107572	-0.718061	-0.739305	0.108447	-0.118094	0.406653	-0.395039	0.243964	-0.617008	0.105504	-0.000280468	-0.572675	-0.635405	-0.439346	0.651678	0.643354	-0.248672	0.350987	-0.251835	0.158189	-0.740122	-0.433627	-0.0594396	0.240043	-0.152153	-0.0265993	-0.581206	0.673423	0.144785
TARGET-30-PANZPV-01A	0.0526205	0.327453	0.175671	0.236932	0.332107	-0.134706	0.413503	-0.320743	-0.32604	-0.0540779	-0.337728	0.142306	-0.337907	0.25951	-0.289145	-0.215153	-0.0476833	0.123182	0.357011	-0.0986413	-0.176474	0.488198	0.348892	0.404579	-0.280663	0.02597	0.233866	-0.624511	-0.158874
TARGET-30-PARSBI-01A	0.651812	0.889817	0.706151	0.627224	0.710937	0.636798	0.583046	0.839997	0.609733	0.694768	0.643026	0.778617	0.822316	0.490659	0.668539	0.649954	0.795672	0.60346	0.859804	0.651933	0.425694	0.227583	0.372807	0.470623	0.674625	0.673201	0.802246	-0.28573	-0.0760301
TARGET-30-PATGJU-01A	0.106714	-0.268781	-0.447392	-0.724167	-0.398918	-0.442662	-0.691622	-0.5255	-0.498725	-0.636343	-0.631647	-0.551636	-0.620627	-0.0280028	0.371227	-0.307584	-0.686907	-0.185393	-0.10063	-0.33526	-0.351851	-0.444761	0.47364	0.355618	-0.1855	0.247893	0.48934	-0.878234	0.165278
TARGET-30-PATYIL-01A	-0.637267	-0.769775	-0.302591	-0.704103	-0.615011	-0.576083	-0.782364	-0.344115	-0.240996	-0.749484	0.0101015	-0.490599	-0.457772	-0.103225	-0.345093	0.10851	-0.270377	-0.544769	-0.579879	-0.438092	-0.203847	0.0532634	-0.374998	-0.17521	0.45558	0.106381	-0.501193	0.075916	0.140741
TARGET-30-PASUYG-01A	-0.732228	-0.682277	-0.39112	-0.323799	-0.462672	-0.407015	-0.617011	-0.5746	-0.268128	-0.239965	-0.480469	-0.592442	-0.529947	-0.629608	-0.38007	-0.633907	-0.415802	-0.313251	-0.553321	-0.624741	-0.0469107	-0.303109	0.0301589	-0.264935	-0.45798	-0.642687	-0.81875	0.788335	-0.097761
TARGET-30-PATBMM-01A	-0.642779	0.319082	-0.471473	0.199303	-0.0917169	0.0418547	0.142081	0.118657	-0.514471	-0.0761906	-0.490654	0.0404613	-0.501621	0.0404198	0.145273	-0.313609	-0.622936	-0.211166	0.10944	0.199309	0.0971977	-0.507695	-0.324328	-0.5868	-0.565681	-0.661203	-0.757006	0.51447	-0.633626
TARGET-30-PAPZYZ-01A	0.733316	-0.500571	0.374664	-0.600679	0.57519	-0.494325	-0.442051	-0.419288	0.533081	-0.455351	0.59958	-0.112317	-0.562914	-0.296627	0.68551	0.769921	0.477638	0.532704	0.257656	0.229299	-0.0769183	0.717901	0.86865	0.586463	0.735567	0.728972	0.819979	-0.231314	0.403745
TARGET-30-PARBAJ-01A	-0.185152	-0.406378	-0.2211	-0.352999	-0.671954	-0.423182	0.102186	-0.437371	-0.366034	-0.545231	-0.519847	-0.473559	-0.0604575	-0.476465	-0.361358	-0.205438	0.158033	-0.299028	0.11497	0.155888	0.0972568	0.0777873	0.668639	0.696008	0.154311	0.344865	0.653531	-0.646513	0.562367
TARGET-30-PAUDDK-01A	0.716682	0.78013	0.660453	0.403002	0.555118	0.615699	0.439728	0.175113	0.649677	0.40367	0.443022	0.331045	0.335974	0.226594	-0.0584753	0.491681	0.609861	0.713595	0.655945	0.748659	0.0833601	0.610609	0.677026	0.779452	0.71411	0.760843	0.823798	-0.346322	0.708792
TARGET-30-PASXGP-01A	-0.888853	-0.78034	-0.780173	-0.704743	-0.763363	-0.653146	-0.658598	-0.658885	-0.6859	-0.485367	-0.291708	-0.566918	-0.393729	-0.212266	-0.592918	-0.727435	-0.582106	-0.633166	-0.816686	-0.435844	-0.409977	-0.789124	-0.72252	-0.746878	-0.641403	-0.663706	-0.837494	0.439611	-0.685756
TARGET-30-PANBSP-01A	-0.698402	-0.874001	-0.691807	-0.749089	-0.833739	-0.68361	-0.728277	-0.511182	-0.657623	-0.483639	-0.640185	-0.857508	-0.731572	-0.556305	-0.284713	-0.7024	-0.808246	-0.674719	-0.838513	-0.689229	-0.619279	-0.475612	-0.497507	-0.421164	-0.45172	-0.318654	-0.0915441	-0.190323	-0.201171
TARGET-30-PASFGG-01A	0.770163	0.768094	0.767738	0.692451	0.780778	0.673967	0.913684	0.82551	0.714957	0.477266	0.467504	0.650935	0.478772	0.652403	0.124733	0.429236	0.468444	0.484817	0.581308	0.667077	-0.213587	0.275779	0.373822	0.50792	0.465747	0.213292	0.621763	0.668725	0.163155
TARGET-30-PAPICY-01A	0.431458	0.639084	0.0630557	0.115385	0.368429	0.259346	0.356066	-0.0453036	0.346717	0.351632	0.361813	0.140947	0.357501	-0.215003	0.708147	0.405077	0.190222	-0.0112185	0.631404	-0.075732	-0.453481	-0.063982	-0.206189	0.219499	-0.062664	0.307858	0.415085	-0.793124	-0.435886
TARGET-30-PASXHE-01A	-0.347244	0.0522111	0.242349	0.553881	0.238033	0.420668	0.476177	-0.00512728	-0.039054	0.509439	0.245586	0.153861	0.674046	0.584448	-0.109752	0.0461293	0.52278	-0.136303	-0.271354	0.261577	0.659221	-0.404285	-0.525815	-0.605042	-0.358812	-0.539691	-0.545031	0.563055	-0.137734
TARGET-30-PARNNC-01A	0.631431	0.518687	0.595888	0.66755	0.450155	0.692397	0.800385	0.870621	0.589612	0.719132	0.400166	0.620311	0.758101	0.78022	0.528453	0.386611	0.601928	0.430864	0.614369	0.611142	0.262749	0.196436	0.614708	0.405809	-0.0359983	0.548771	0.778466	-0.678201	0.247132
TARGET-30-PALZZV-01A	-0.952246	-0.740955	-0.718693	-0.812432	-0.76072	-0.704701	-0.781723	-0.706641	-0.559231	-0.578146	-0.630532	-0.74798	-0.454405	-0.500584	-0.578659	-0.489323	-0.74841	-0.666488	-0.710909	-0.769982	-0.597751	-0.464273	-0.497255	-0.598527	-0.692602	-0.755388	-0.799178	0.589273	-0.370925
TARGET-30-PARAMT-01A	-0.787373	-0.729856	-0.552	-0.52909	-0.752278	-0.468355	-0.71255	-0.370909	-0.652021	-0.395817	-0.765468	-0.572015	-0.58656	-0.48448	0.549162	-0.514544	-0.51546	-0.612458	-0.767488	-0.621377	0.0467643	-0.474622	-0.615339	-0.617236	-0.364733	-0.554575	-0.799878	0.289392	-0.58399
TARGET-30-PALETP-01A	0.479924	0.523759	0.389379	0.436208	0.326581	0.0555479	0.639751	0.814494	0.0413818	0.233747	0.0465382	0.376688	0.516505	0.656578	-0.249318	-0.432787	-0.101612	-0.32953	0.502711	-0.0668817	0.314702	0.284771	0.102699	-0.156179	-0.0238597	-0.452673	-0.448436	0.418427	-0.62564
TARGET-30-PALNVP-01A	0.173037	-0.59584	-0.511178	-0.669187	-0.0919996	-0.569531	-0.608881	-0.581303	-0.159879	-0.6759	0.244068	-0.639886	-0.630455	0.0214261	-0.324806	-0.128995	-0.687931	-0.404125	-0.703111	-0.435704	-0.66875	-0.116134	-0.707999	-0.360745	-0.291481	0.30943	-0.00918337	-0.542701	0.122246
TARGET-30-PAPBGH-01A	-0.481962	-0.811283	-0.493373	-0.784731	-0.539494	-0.65413	-0.707538	-0.602169	-0.0284244	-0.696823	-0.135321	-0.673814	-0.65992	-0.546192	0.0823241	-0.420268	-0.56656	-0.501704	-0.713696	-0.732143	-0.736565	0.143479	-0.42608	0.190527	0.390374	0.283057	0.501249	0.309132	0.111696
nan	0.553623	0.728564	0.387657	0.191311	0.271415	0.1717	0.612756	0.715577	0.317288	0.0898738	0.627695	0.553479	0.387031	0.480412	0.257589	0.214436	0.402418	0.317795	0.527348	0.584067	-0.647625	0.34527	-0.0679508	-0.263876	0.0545257	-0.474908	-0.34291	0.553859	0.158559
TARGET-30-PAMVRA-01A	-0.617428	-0.132068	-0.406416	-0.11537	-0.423876	-0.516854	-0.0632079	-0.14433	-0.436617	-0.588616	0.183107	-0.566512	-0.51085	-0.00698911	-0.487134	-0.517195	-0.178578	-0.420006	-0.343434	-0.321513	-0.827416	-0.510275	-0.617565	-0.339764	-0.0206333	-0.535028	-0.787402	0.769974	-0.431419
TARGET-30-PALCBW-01A	0.714897	0.887136	0.385185	0.41196	0.310063	0.589836	0.516295	0.308902	0.125645	0.249896	0.00705759	0.449069	0.182612	0.268675	0.497181	0.328531	0.633162	0.650558	0.686128	0.610975	-0.233488	0.505948	0.73181	0.65655	-0.0461534	0.484262	0.723018	-0.792443	0.678679
TARGET-30-PATDXC-01A	0.802572	0.649808	0.704888	0.663471	0.554821	0.497983	0.854615	0.866092	0.676273	0.356671	0.318828	0.731033	0.531755	0.730048	0.614661	0.562638	0.465717	0.46155	0.736159	0.615284	0.290188	0.550058	0.369631	0.425475	0.519165	0.616622	0.720733	0.478018	-0.00223993
TARGET-30-PASMNT-01A	-0.637301	-0.368285	-0.524838	-0.589489	-0.403825	-0.109528	-0.674828	-0.346389	-0.272461	-0.372896	-0.352215	-0.438402	0.350707	-0.272324	-0.234224	-0.385357	-0.0930293	-0.465717	0.472354	-0.332793	0.419671	-0.54089	-0.840119	-0.777884	-0.720848	-0.553941	-0.750874	0.313792	-0.508152
TARGET-30-PANZVU-01A	0.440851	0.523669	0.535673	0.299499	0.206319	0.391903	0.728844	0.675763	0.33829	0.273859	0.421755	0.491159	0.597001	0.493756	-0.0453175	0.223539	0.280368	0.018164	0.316862	0.056026	0.294309	-0.265366	0.180215	-0.0260178	-0.0790011	0.542728	0.576501	-0.32706	-0.0716264
TARGET-30-PASJZC-01A	-0.410255	0.373576	-0.44807	0.276642	0.0312324	0.550138	0.0643914	-0.197772	0.2086	0.159194	-0.0447342	-0.12063	0.195098	0.0771423	-0.0503363	-0.00548118	-0.12508	-0.17286	0.0727673	0.170786	0.132934	-0.389994	0.366229	0.3766	-0.0664699	-0.021137	0.216095	-0.825681	0.389597
TARGET-30-PASZPI-01A	0.755036	0.712114	0.692593	0.791797	0.551408	0.641947	0.857641	0.93099	0.64509	0.82359	0.57161	0.619858	-0.0840141	0.418388	0.59338	0.436588	0.30733	0.486881	0.537238	0.514486	0.34839	0.229296	0.693717	0.572667	0.341867	0.458224	0.580327	0.509615	-0.0418357
TARGET-30-PASSWW-01A	-0.752862	-0.859545	-0.322866	-0.728205	-0.671154	-0.370206	-0.572132	-0.658112	-0.695623	-0.36216	-0.516937	-0.335871	-0.316059	-0.368594	0.425458	0.254058	-0.319149	-0.398192	-0.426137	-0.641016	-0.0930021	-0.386033	-0.278822	-0.222799	0.377087	-0.0361016	-0.0238428	0.610721	0.203387
TARGET-30-PALTEG-01A	0.590761	0.690157	0.585693	0.764802	0.687037	0.647767	0.78463	0.772509	0.589275	0.610197	0.639542	0.75049	0.250303	0.673628	0.581659	0.511469	0.638445	0.651064	0.240343	0.668172	0.0651779	0.336486	0.478895	0.496842	0.610431	0.702935	0.778126	0.592696	0.071624
TARGET-30-PAPTLV-01A	0.392446	-0.504119	-0.180784	-0.46436	-0.130594	-0.366385	-0.533624	-0.444168	0.0656784	-0.117582	-0.0609241	-0.2634	-0.484518	-0.540597	0.686616	0.629355	0.241208	0.663444	0.703959	0.605009	-0.299601	0.559555	0.8518	0.757982	0.580424	0.576888	0.802964	0.401752	0.238343
TARGET-30-PANRRW-01A	0.672065	0.513216	0.359191	0.721592	0.701751	0.76675	0.625059	0.502575	0.3374	0.683205	0.441632	0.613537	0.817286	0.388326	-0.483286	-0.415217	0.464119	-0.204205	0.490593	0.197361	0.70027	-0.226276	-0.666669	-0.620371	-0.67752	-0.0506019	0.482578	-0.868987	-0.581533
TARGET-30-PANYGR-01A	-0.743895	-0.763565	-0.435802	-0.39012	-0.45908	-0.390043	-0.448055	-0.45132	-0.287168	-0.412214	-0.287043	-0.33535	-0.405449	-0.669516	-0.630292	-0.288882	-0.519731	-0.545631	-0.610157	-0.393328	-0.248637	-0.33462	-0.353827	-0.452622	0.350367	0.106365	-0.422629	0.617372	-0.46468
TARGET-30-PASHFA-01A	-0.190594	0.563877	0.642698	0.32448	0.386924	0.314739	0.611779	0.85111	0.623357	0.34753	0.621906	0.557434	0.0744913	0.162044	-0.0897717	0.59009	0.404022	0.461007	-0.156272	0.430355	0.00192057	0.591883	0.34158	0.379496	0.380787	0.17276	0.162327	0.618066	-0.0398796
TARGET-30-PATHVK-01A	-0.743007	-0.614331	-0.357637	-0.775375	-0.572792	-0.796328	-0.766261	-0.754644	-0.441063	-0.449964	-0.0708383	-0.428403	-0.283823	-0.462929	-0.643362	-0.140291	-0.17792	-0.130738	0.311556	-0.361195	0.214557	-0.343048	-0.109557	-0.116233	0.449891	0.292205	0.359919	0.526184	-0.142329
TARGET-30-PASNML-01A	-0.860543	-0.665497	-0.696731	-0.849041	-0.772304	-0.586638	-0.797856	-0.799524	-0.675753	-0.697625	0.269413	-0.606851	-0.254985	-0.604008	-0.492673	-0.626246	-0.457214	-0.694011	-0.654762	-0.783062	-0.451054	-0.739588	-0.617239	-0.428226	-0.590044	-0.705274	-0.72827	-0.214122	-0.234217
TARGET-30-PANRVJ-01A	0.369218	0.524824	0.135574	-0.293293	0.534302	-0.0814444	-0.204428	-0.149504	0.554309	-0.157872	0.484924	-0.384872	0.00692016	-0.281918	-0.318041	0.3564	0.560818	0.500145	0.353952	0.555535	0.310518	0.447281	0.812376	0.713625	0.292559	0.504064	0.66306	-0.841172	0.379538
TARGET-30-PAPBZI-01A	-0.551978	-0.648938	-0.585955	-0.468937	-0.41592	-0.42793	-0.542157	0.428481	-0.515751	-0.299089	-0.500944	-0.378996	-0.514738	-0.533877	0.0944363	-0.457594	-0.557076	-0.530538	-0.570729	-0.623212	-0.588333	-0.210794	-0.331295	-0.478812	0.197512	0.151439	0.397711	0.191457	-0.160764
TARGET-30-PAPTDH-01A	0.513909	-0.744585	0.103357	-0.768567	-0.585395	-0.545676	-0.736295	-0.340222	0.100827	-0.155246	0.37057	-0.587184	-0.508268	0.112879	0.727277	0.2976	-0.109215	0.233565	-0.568656	-0.591705	-0.328341	0.113567	0.517979	0.498198	0.762787	0.572769	0.666342	-0.540404	0.339283
TARGET-30-PASMDM-01A	-0.195571	-0.00333339	-0.438989	0.233277	0.0221104	0.121545	0.372348	0.416205	0.348256	0.100026	0.207637	-0.316641	0.242174	0.030765	0.734248	0.600319	-0.124736	0.211583	0.205059	-0.0655581	-0.33446	-0.302226	0.328036	0.577473	0.0461205	0.121718	0.439715	-0.816877	-0.150668
TARGET-30-PANWRR-01A	-0.719375	-0.808747	-0.661237	-0.565561	-0.737072	-0.616185	-0.732732	-0.289603	-0.721031	-0.515184	-0.58103	-0.782308	-0.671587	-0.215139	-0.553776	-0.718214	-0.772821	-0.597055	-0.806449	-0.599367	-0.565478	-0.491996	-0.457062	-0.529081	-0.0669376	-0.165992	-0.381559	0.0994873	0.130862
TARGET-30-PALBFW-01A	0.596014	0.386999	0.415489	0.575766	0.642836	0.610875	0.603265	0.0159357	0.626877	0.266539	0.206488	0.445621	0.425495	0.106181	-0.122202	-0.0623338	0.440245	0.283391	0.435867	0.133959	0.712123	0.405232	-0.462564	-0.487039	-0.544244	0.410172	0.786498	-0.823942	-0.167536
TARGET-30-PARZIP-01A	0.0572101	0.281721	0.0775366	0.620394	0.173145	0.53914	0.669191	0.757822	-0.168308	0.676654	0.137556	0.241603	0.478179	0.335696	-0.273611	-0.455075	0.205866	-0.291721	-0.639178	-0.178265	-0.456012	-0.32824	-0.754824	-0.582162	-0.660931	-0.596956	-0.74753	-0.117807	-0.46135
TARGET-30-PASNPG-02A	0.579176	0.528676	-0.374465	-0.408519	0.412196	-0.41589	-0.426783	-0.603236	-0.123331	-0.339032	-0.0338213	-0.233749	-0.0506218	-0.684646	-0.293166	0.346993	0.298372	0.375348	0.407244	0.557193	-0.274069	0.443254	0.639477	0.431417	0.0587025	0.246333	0.438429	0.120321	0.663097
TARGET-30-PAMNLH-01A	-0.810575	-0.670253	-0.682634	-0.764693	-0.829073	-0.693047	-0.679586	-0.633428	-0.677915	-0.653772	-0.493914	-0.73346	-0.496485	-0.422439	-0.598803	-0.643942	-0.693265	-0.596436	-0.675254	-0.530668	-0.617891	-0.488465	-0.685295	-0.845386	-0.236685	-0.460549	-0.793981	0.643742	-0.393746
TARGET-30-PATINJ-01A	-0.135743	-0.075418	-0.159777	0.358415	-0.352851	0.0481373	0.447667	0.0367702	-0.215613	-0.448848	-0.106928	0.237973	-0.474695	0.401051	0.139405	-0.672739	-0.57995	-0.403751	-0.0400753	-0.215909	-0.319279	-0.52131	-0.38145	-0.356628	-0.54621	0.0219577	0.4319	0.614858	-0.446113
TARGET-30-PALEVG-01A	-0.128732	-0.106687	-0.194724	0.317784	0.108045	-0.383648	0.389907	0.461512	-0.225581	-0.11969	-0.373229	0.304409	0.0478769	0.281529	0.141042	-0.568449	-0.430203	-0.0767436	0.141218	0.0214052	-0.488328	0.135018	0.516829	0.470267	0.0220447	-0.43031	-0.313795	0.52924	-0.325353
TARGET-30-PASSRN-01A	0.44073	-0.468342	0.0249687	0.50195	0.514756	0.070734	0.119643	-0.140697	0.157651	-0.149106	0.251983	-0.422532	0.133868	-0.264982	0.435672	0.358138	0.276578	0.372214	-0.0769565	-0.0277377	-0.039629	0.168301	0.48301	0.600169	0.268989	0.60109	0.747962	-0.707658	0.362198
TARGET-30-PASUCB-01A	-0.836576	-0.712767	-0.768148	-0.839898	-0.624682	-0.647868	-0.890435	-0.711745	-0.538323	-0.665354	-0.512096	-0.610566	-0.154102	-0.470163	-0.444578	0.131584	-0.50797	-0.344862	-0.6961	-0.679022	-0.518794	-0.356623	-0.261767	0.246728	-0.319643	-0.678105	-0.830163	0.711992	-0.234923
TARGET-30-PALVKK-01A	0.917645	0.755322	0.584037	0.563009	0.720744	0.48915	0.558535	0.415481	0.485326	0.525627	0.398367	0.618319	0.54453	0.468884	0.205133	0.218246	0.696957	0.604044	0.803062	0.655522	0.441091	0.724222	0.58863	0.584948	-0.129135	0.610911	0.67663	-0.761041	0.435676
TARGET-30-PALWVJ-01A	-0.212881	-0.387885	0.118427	-0.532189	-0.247536	-0.550874	-0.434525	-0.655662	0.0899094	-0.202958	0.60736	-0.317424	-0.44108	-0.651127	0.111559	0.640628	0.330575	0.308044	0.189404	-0.124727	-0.308483	0.575276	0.35993	0.339652	0.462428	0.0591371	-0.585383	0.214143	0.541407
TARGET-30-PARHAM-01A	-0.512574	-0.438607	-0.411529	-0.801582	-0.537661	-0.609483	-0.660629	-0.753075	-0.481543	-0.386882	0.0920834	-0.710036	-0.517584	-0.466881	-0.507664	-0.565534	-0.613497	-0.445468	0.235559	-0.540509	-0.00485338	-0.416225	0.343996	0.637906	-0.159722	-0.394504	-0.681806	-0.37565	-0.211457
TARGET-30-PATFXV-01A	-0.703746	-0.733462	-0.598809	-0.550782	-0.0209263	-0.553664	-0.82234	-0.00998195	-0.405704	-0.378929	-0.0835555	-0.734406	-0.546022	-0.611312	-0.617491	-0.394342	-0.294945	-0.586543	-0.716863	-0.614093	-0.579099	-0.0192245	0.150969	-0.0364034	0.167852	-0.38727	-0.310807	0.695598	0.402622
TARGET-30-PATHKB-01A	-0.650281	-0.849309	-0.808314	-0.690102	-0.916665	-0.36427	-0.657255	-0.445534	-0.633575	-0.578996	-0.502749	-0.586309	-0.446341	-0.560016	0.585456	-0.207089	-0.583419	-0.582766	-0.900072	-0.728604	-0.20216	-0.568176	-0.629309	-0.392839	-0.583525	-0.389551	-0.590076	-0.0244415	-0.396752
TARGET-30-PAIPGU-01A	0.736612	0.554793	0.554119	0.768951	0.714744	0.615513	0.670317	0.609561	0.638526	0.401958	0.480616	0.611286	-0.00615813	0.633582	0.722451	0.569605	0.564285	0.580311	0.432818	0.601876	0.491731	0.283222	0.184615	0.319993	0.383656	0.628055	0.75164	0.634229	0.0112544
TARGET-30-PAPTCR-01A	0.532971	0.80516	0.403772	0.53081	0.546447	0.657056	0.230887	-0.553976	0.582818	0.332927	0.388092	0.300416	0.171487	0.340483	0.339412	0.795765	0.557237	0.73213	0.583991	0.724588	0.0361846	0.39304	0.721353	0.505548	0.374334	0.421107	0.474041	-0.81637	0.403323
TARGET-30-PASWFB-01A	-0.889692	-0.948586	-0.65047	-0.765449	-0.792935	-0.725571	-0.827849	-0.700339	-0.473258	-0.587429	-0.646153	-0.634938	-0.500644	-0.646102	-0.430627	-0.651654	-0.679022	-0.620574	-0.731159	-0.811222	-0.655679	-0.199222	0.430849	-0.284301	-0.0804277	-0.357817	-0.490805	0.656116	0.113213
TARGET-30-PAPKXS-01A	-0.766884	-0.65797	-0.113662	0.313117	-0.804279	0.340462	0.365374	0.328618	-0.412658	0.0637211	-0.410618	-0.00779231	0.462958	0.375665	-0.461575	-0.563081	-0.300645	-0.555561	-0.674004	-0.0389346	0.33619	-0.759498	-0.606725	-0.497663	-0.53417	-0.596357	-0.638986	0.285541	-0.455219
TARGET-30-PARDIW-01A	0.461594	0.837678	0.558795	0.772555	0.505269	0.699322	0.760607	0.780868	0.417812	0.462422	0.170486	0.740308	0.764659	0.446217	0.326129	0.280197	0.632126	0.340911	-0.0721822	0.377094	0.072037	-0.612176	-0.575399	-0.434138	-0.496846	-0.225666	-0.0277403	0.0771151	-0.415571
TARGET-30-PAPVEB-04A	-0.654819	-0.786828	-0.587732	-0.658345	-0.359111	-0.655006	-0.65593	-0.57536	0.146802	-0.57485	0.310883	-0.565955	-0.696999	-0.587867	0.0964965	-0.0464728	-0.311192	-0.339867	-0.796098	-0.334892	-0.14111	-0.788413	-0.581315	-0.685881	-0.0654478	-0.534035	-0.866807	0.724581	-0.181041
TARGET-30-PASSRS-01A	-0.781504	-0.901466	-0.697547	-0.806859	-0.652732	-0.65823	-0.876087	-0.637238	-0.597272	-0.739516	-0.449332	-0.818225	-0.628073	-0.695324	-0.646872	-0.81637	-0.65164	-0.815839	-0.728146	-0.657593	-0.600241	-0.737559	-0.681688	-0.501634	-0.0278173	-0.176246	0.216965	0.409469	-0.134435
TARGET-30-PAIVHE-01A	0.662464	0.57059	0.744393	0.610856	0.479024	0.504178	0.810247	0.625901	0.548285	0.52125	0.445575	0.586286	0.469326	0.717614	0.00691086	0.262737	0.623961	0.469645	0.464875	0.0640765	0.728824	0.479798	0.523574	0.602713	0.535927	0.356894	0.647107	-0.252293	0.377445
TARGET-30-PAPCTS-01A	-0.789455	-0.793465	-0.635587	-0.705814	-0.70978	-0.790675	-0.771227	-0.678025	-0.574973	-0.230784	-0.621686	-0.795397	-0.609515	-0.611581	-0.744828	-0.537775	-0.670359	-0.58831	-0.894638	-0.732507	-0.700253	-0.375757	-0.579828	-0.370457	-0.513604	-0.694154	-0.875559	-0.282803	0.0855493
TARGET-30-PALIIN-01A	0.535634	0.554195	0.615622	0.541667	0.535861	0.38505	0.668937	0.864698	0.642532	0.407917	0.197555	0.688025	0.706763	0.672597	-0.0488468	0.292696	0.543076	0.138474	-0.107531	0.0312258	0.734145	0.144686	-0.39445	-0.451544	0.212896	0.296834	0.350479	0.472416	0.0301096
TARGET-30-PANGXK-01A	0.741322	0.887643	0.595108	0.428129	0.689432	0.489353	0.141376	-0.274559	0.725794	-0.15163	0.659555	0.52963	0.087969	0.279223	0.219008	0.678165	0.652543	0.686992	0.725651	0.611741	-0.175838	0.649922	0.627274	0.29124	-0.135243	0.561168	0.505196	-0.806301	0.163923
TARGET-30-PASMJG-01A	0.728188	0.87257	0.420496	0.439233	0.463621	0.481892	0.416849	-0.306162	0.304583	-0.0259651	-0.456105	0.577273	0.193466	0.445925	0.65075	0.762325	0.47768	0.701813	0.646029	0.855025	0.448233	0.600271	0.536419	0.314946	-0.30169	0.487784	0.483052	-0.866807	0.313344
TARGET-30-PATCFL-01A	-0.600279	0.00575203	-0.344409	0.114189	-0.145497	-0.182238	0.305517	0.438344	-0.246875	-0.393012	-0.307944	-0.247355	-0.0908839	-0.519	-0.257508	-0.66799	-0.432731	-0.47643	-0.0260299	0.0594071	0.0523521	-0.291975	-0.382194	-0.266537	-0.482014	-0.497376	-0.453724	-0.428716	-0.558876
TARGET-30-PARKGJ-01A	0.638986	0.720958	0.651792	0.0349456	0.310327	-0.0332447	-0.0399109	-0.399318	0.67132	0.46682	0.612178	0.483526	0.119949	0.345407	0.663127	0.919763	0.657103	0.785946	0.707744	0.579081	0.337992	0.777736	0.743355	0.634246	0.573229	0.631648	0.458258	0.1255	0.311319
TARGET-30-PANBMJ-01A	0.350575	0.548253	0.466289	0.544749	0.43601	0.578869	0.752002	0.585107	0.094559	0.418852	-0.012814	0.443743	0.677462	0.620529	0.146802	-0.0611083	0.539439	0.265253	0.384347	0.394784	0.134863	0.236695	-0.150901	0.101826	-0.124631	-0.312265	-0.243263	-0.521732	0.0238937
TARGET-30-PASNEF-01A	-0.591594	0.0468475	-0.320624	-0.0108885	-0.169543	-0.0267044	0.302767	0.715934	-0.613285	-0.397137	-0.0830586	0.000942029	0.084926	0.239627	-0.310429	-0.519732	-0.418154	-0.4695	0.126793	-0.0171761	-0.200566	-0.731296	-0.738954	-0.687748	-0.29716	-0.468385	-0.733225	0.637164	-0.761845
TARGET-30-PAMYCE-01A	0.749094	0.156799	0.624117	0.569596	0.557683	0.300309	0.637251	0.175759	0.213309	0.420591	0.410918	0.718191	0.655159	0.504282	-0.189004	-0.0547022	0.463136	0.241886	0.54761	0.613859	0.669628	0.469951	0.487169	0.511921	0.173328	0.404083	0.634822	-0.0245148	0.0820942
TARGET-30-PAPLSD-01A	0.60305	0.526037	0.132475	0.340563	0.301819	0.253717	0.460508	-0.260192	0.359713	0.113158	0.00071296	0.630631	0.268284	-0.343181	0.493833	0.225726	0.404482	0.544538	0.816635	0.365299	0.52414	0.213304	0.483673	0.156974	0.0298665	0.37214	0.40525	0.503524	-0.0547729
TARGET-30-PASWYR-01A	-0.786074	-0.955923	-0.739316	-0.797802	-0.847798	-0.70651	-0.858028	-0.67909	-0.597128	-0.47054	-0.707401	-0.794457	-0.74121	-0.730219	-0.627722	-0.755793	-0.747776	-0.57873	-0.813822	-0.825833	-0.157816	-0.198593	0.0180072	-0.221004	-0.115849	-0.283871	-0.60139	0.490451	-0.290217
TARGET-30-PARGKK-01A	0.113379	0.174872	-0.0522427	0.446601	-0.123641	0.21025	-0.212742	-0.655203	-0.270054	-0.533933	-0.527146	-0.104547	-0.28529	-0.446234	0.253084	-0.154101	-0.418092	-0.0960948	0.20197	-0.323203	-0.196119	-0.601754	-0.595349	-0.419155	-0.324295	0.110776	0.361298	-0.8637	-0.399262
TARGET-30-PASWVY-01A	0.610869	0.408939	0.105202	0.800078	0.650001	0.697549	0.738049	0.420698	-0.0219455	0.731825	0.268256	0.769345	0.485276	0.329027	-0.706608	-0.656658	0.0517204	-0.447316	0.427355	0.327544	0.548363	-0.414132	-0.87036	-0.696125	-0.507321	-0.75466	-0.722521	0.343423	-0.560933
TARGET-30-PATNKP-02A	-0.531366	-0.639921	-0.616273	-0.7754	-0.684678	-0.70705	-0.84436	-0.653002	-0.542723	-0.640006	-0.347192	-0.778339	-0.564428	-0.372763	-0.505874	-0.414128	-0.653941	-0.618262	-0.748705	-0.494255	-0.63056	-0.55795	-0.590266	-0.552129	0.0396702	-0.251106	-0.549951	0.608755	0.115741
TARGET-30-PASNZU-01A	-0.938623	-0.933568	-0.695657	-0.802869	-0.802573	-0.722373	-0.877479	-0.437272	-0.682938	-0.638616	-0.658893	-0.871834	-0.61889	-0.721373	-0.482594	-0.405874	-0.7473	-0.425287	-0.795906	-0.823985	-0.790158	-0.319644	-0.140107	-0.506437	0.157477	-0.162797	-0.51819	0.517384	-0.0802218
TARGET-30-PAPBJE-01A	0.492145	-0.83333	-0.168417	-0.720888	-0.441015	-0.588613	-0.806362	-0.463935	-0.0512394	-0.413034	0.157278	-0.694681	-0.786888	-0.468312	-0.185891	0.107382	-0.486097	-0.0343756	-0.836365	-0.698343	-0.347722	0.503251	0.430601	0.345399	0.6031	0.446848	0.582128	-0.383472	0.304681
TARGET-30-PASPBZ-01A	-0.760608	-0.93643	-0.802572	-0.888217	-0.897734	-0.72341	-0.936501	-0.686907	-0.743952	-0.714329	-0.573092	-0.831235	-0.557008	-0.6046	-0.614474	-0.521548	-0.550809	-0.555669	-0.701739	-0.831866	-0.733587	-0.130509	-0.511057	-0.405699	0.377391	-0.306917	-0.726938	0.125369	-0.101209
TARGET-30-PANZRV-01A	-0.0940865	-0.499918	-0.5591	-0.677241	-0.800219	-0.499731	-0.666665	-0.500939	-0.329356	-0.723057	-0.441152	-0.374677	0.268577	0.232767	-0.0304878	-0.513486	-0.418554	-0.467678	-0.29535	-0.721721	-0.209566	-0.560231	-0.115511	0.424684	0.334867	0.319925	0.511635	-0.462497	-0.332968
TARGET-30-PANXJL-01A	0.79692	0.926991	0.727646	0.695463	0.782514	0.748149	0.714029	0.414951	0.691197	0.70308	0.609008	0.631745	0.276269	0.517538	0.442852	0.692302	0.590203	0.768308	0.82231	0.733714	0.166983	0.800959	0.756892	0.545391	0.531506	0.712951	0.818592	-0.735897	0.350825
TARGET-30-PASXRG-01A	-0.698533	-0.338994	-0.34676	-0.262301	-0.348293	-0.403763	-0.558335	-0.228192	-0.673829	0.243659	-0.574723	-0.416346	-0.443166	-0.591371	0.678196	0.503848	-0.26944	-0.0113412	-0.566495	-0.490917	-0.163494	-0.457646	0.0331721	-0.42802	0.0393924	-0.456338	-0.793779	0.613534	-0.378335
TARGET-30-PASCFC-01A	-0.787832	-0.389312	-0.500398	-0.503373	-0.742676	-0.52137	-0.339274	-0.717178	-0.443487	-0.304645	-0.418575	-0.372611	0.143338	-0.165951	0.436967	-0.555434	-0.437632	-0.599166	-0.684745	-0.495739	0.103726	-0.802014	-0.619465	-0.488049	-0.459334	-0.488612	-0.645331	-0.769086	-0.428451
TARGET-30-PANBJH-01A	-0.722039	-0.515727	-0.575788	-0.557204	-0.342206	-0.524195	-0.692097	-0.541321	-0.595653	-0.612371	-0.149195	-0.491394	-0.435501	-0.479978	-0.609432	-0.384599	-0.175964	-0.443836	-0.390903	-0.331978	-0.060499	-0.257424	-0.129515	-0.44201	-0.470739	-0.483654	-0.588858	0.571433	-0.253262
TARGET-30-PARVLK-01A	0.00615655	-0.597656	-0.346382	-0.605134	-0.342326	-0.677336	-0.593956	-0.227089	-0.382333	-0.662942	-0.0601788	-0.757953	-0.690384	-0.494905	-0.598936	-0.437	-0.406899	-0.355648	-0.510965	-0.532784	-0.173197	0.265934	0.188445	0.420734	0.544423	0.228364	-0.0138463	-0.314963	0.141679
TARGET-30-PASRFS-01A	0.808388	0.794543	0.555126	0.723433	0.586507	0.772868	0.820048	0.971229	0.144312	0.596764	0.530311	0.79625	0.641999	0.527542	-0.519244	-0.273281	0.217994	0.32767	0.629807	0.342063	0.0641994	-0.345225	-0.57693	-0.376957	-0.673947	-0.492931	-0.393375	-0.424702	-0.614054
TARGET-30-PATGLU-01A	0.108842	0.00594214	0.454181	0.714158	0.685471	0.653607	0.613519	0.29787	0.229532	0.819871	0.40075	0.488473	0.41345	0.391372	-0.0407732	-0.0577714	0.360326	0.288271	0.439322	0.63033	0.749162	0.574705	-0.024552	-0.309346	-0.0914597	-0.009924	0.0850113	0.689375	0.0112545
TARGET-30-PAMZMG-01A	-0.710055	-0.565155	-0.563992	-0.50148	-0.336503	-0.561699	-0.666202	0.0261831	-0.362878	-0.439089	-0.297808	-0.500427	-0.658593	-0.36455	0.178866	0.169658	-0.439105	0.0427043	-0.539969	-0.64163	-0.436484	0.288356	-0.16232	-0.240863	-0.383475	-0.431491	-0.496137	0.652601	-0.15975
TARGET-30-PATEPF-01A	-0.882192	-0.492877	-0.426267	-0.417469	-0.509658	-0.335987	-0.459536	-0.463825	-0.533927	-0.129445	-0.280486	-0.545321	-0.526605	-0.309029	-0.641709	-0.402638	-0.1226	-0.344773	-0.61607	0.404538	-0.238625	-0.52102	-0.744615	-0.526037	-0.232571	-0.575417	-0.803435	0.648478	-0.671674
TARGET-30-PASXIE-01A	-0.925299	-0.825903	-0.778869	-0.727177	-0.761862	-0.683095	-0.741168	-0.618137	-0.731806	-0.267312	-0.583728	-0.663866	-0.505904	-0.615013	-0.676878	-0.502608	-0.879769	-0.653101	-0.817808	-0.739076	-0.624821	-0.360738	-0.482424	-0.627624	-0.569129	-0.760197	-0.808224	0.746254	-0.227028
TARGET-30-PANUIF-01A	0.594395	-0.183174	0.399833	-0.104026	0.0615841	-0.197639	-0.609967	-0.507188	0.515146	0.0754413	0.626649	-0.0554167	-0.189698	-0.362241	-0.153937	0.0248459	-0.0580415	0.281505	0.198805	-0.522511	0.0645867	0.463734	-0.0288456	0.434778	0.589366	0.588207	0.327261	-0.812645	-0.249604
TARGET-30-PARYNK-01A	0.254389	0.412997	0.446975	0.788789	0.675418	0.67634	0.601272	0.350204	-0.139281	0.634872	0.400695	0.675697	0.736163	0.444092	-0.437081	-0.566963	-0.0684126	-0.344589	-0.150652	0.286595	0.624185	-0.400587	-0.721006	-0.428828	-0.5988	-0.474088	-0.528452	0.660231	-0.755234
TARGET-30-PASWIJ-01A	0.685906	0.6936	0.61669	0.61427	0.530762	0.619316	0.871898	0.779147	0.621227	0.739226	0.546212	0.749674	0.609551	0.739058	0.479151	0.36823	0.30416	0.400772	0.548953	0.277925	0.608373	0.0202324	0.282579	0.502619	0.261609	0.449084	0.691819	-0.13239	0.48347
TARGET-30-PASTKC-01A	0.533442	0.713401	0.464761	0.661515	0.626189	0.567236	0.600366	-0.132634	0.415392	0.503755	0.141147	0.628786	0.683415	0.35519	-0.0012943	0.633147	0.63669	0.51347	0.741094	0.733605	0.7878	0.553227	0.483402	0.498302	0.227182	0.0736405	0.10492	-0.372518	0.0799183
TARGET-30-PARBGP-01A	0.350344	0.460534	0.323873	0.716411	0.377487	0.46609	0.698716	0.691784	-0.0653549	0.515186	0.116328	0.591413	0.630393	0.447184	-0.699509	-0.52585	0.0358902	-0.47097	0.385034	0.286905	0.470084	-0.651081	-0.627338	-0.480852	-0.431451	-0.450379	0.132106	0.357341	-0.464766
TARGET-30-PALXTB-01A	0.522716	0.787516	0.497566	0.589756	0.66642	0.524578	0.594806	0.00536161	0.26788	0.556196	0.472925	0.711751	0.474963	0.561762	0.178326	-0.0430103	0.463533	0.417892	0.755456	0.460292	-0.49243	-0.14134	-0.477155	-0.219315	-0.118197	-0.0894146	-0.0135528	-0.761151	-0.00439694
TARGET-30-PANJLH-01A	0.788025	0.408934	0.410527	-0.0890008	0.594793	0.0324147	-0.061513	-0.29865	0.384203	0.0260675	0.282959	-0.0326768	-0.113208	-0.53713	0.347821	0.351295	0.273313	0.6131	0.754822	0.672428	-0.0559033	0.663889	0.725344	0.64942	0.437144	0.619891	0.852911	-0.630168	0.476513
TARGET-30-PASGUT-01A	0.328457	0.474543	0.379708	0.779839	0.282193	0.746463	0.725497	0.447858	-0.328676	0.642601	-0.14846	0.738765	0.630691	-0.137554	-0.565197	-0.754864	0.12728	-0.500697	0.0267061	0.346337	0.614533	-0.436059	-0.677937	-0.602051	-0.623523	-0.785574	-0.818795	-0.121736	-0.644536
TARGET-30-PARZHA-01A	-0.732971	-0.35087	-0.538704	-0.375161	-0.637235	-0.184215	-0.363177	-0.626189	-0.457823	-0.0443958	-0.305462	-0.442456	0.387399	-0.0747226	-0.467552	-0.331326	0.00616531	-0.550285	-0.75689	-0.298681	0.213688	-0.649949	-0.540465	0.00374543	-0.46126	-0.420419	-0.535107	0.339462	-0.550865
TARGET-30-PAPVRN-01A	0.62226	0.597239	0.603671	0.603194	0.505982	0.415054	0.695714	0.690017	0.423185	0.35707	0.235585	0.45388	0.201548	0.345314	0.367123	0.586103	0.221779	0.521346	0.569429	0.601838	0.323774	0.43091	-0.539435	-0.598211	-0.255899	0.310433	0.286563	-0.807611	-0.149341
TARGET-30-PAPUEB-01A	0.535261	0.551151	0.444582	0.743543	0.0603675	0.660905	0.92141	0.96458	0.474628	0.541088	0.273993	0.549809	0.551822	0.315087	0.522899	-0.031264	0.322488	0.0914247	0.396622	0.215909	0.445509	-0.433354	-0.177003	-0.235891	-0.572046	-0.445597	-0.226808	0.611074	-0.558
TARGET-30-PARFRE-01A	-0.866377	-0.708165	-0.633509	-0.684614	-0.793338	-0.64983	-0.51579	-0.225141	-0.629255	-0.492247	-0.526166	-0.805527	-0.457467	-0.228982	-0.0513854	0.477917	-0.359633	-0.368744	-0.730393	-0.62043	-0.549883	-0.449486	-0.00692537	0.284884	-0.240421	-0.475658	-0.773127	0.635211	-0.0318703
TARGET-30-PAMZGT-01A	0.303952	-0.409761	0.250704	0.0689711	0.616745	0.0706248	0.160333	-0.303851	0.431447	0.00594448	0.482218	0.193999	-0.182168	-0.0303122	0.675818	0.76259	0.43514	0.735728	0.279507	0.468394	0.706575	0.762508	0.772611	0.661465	0.76058	0.73967	0.791351	0.536006	0.791724
