# Supplementary material for: Immune microenvironment heterogeneity reveals distinct subtypes in neuroblastoma: insights into prognosis and therapeutic targets
Source: Aging (Albany NY). 2023 Nov 27;15(22):13345–67. doi: 10.18632/aging.205246 (PMC10713432; doi:10.18632/aging.205246)
Supplement: Supplementary Table 5 [file aging-15-205246-s005.xlsx]

## Sheet: Sheet 1
Supplementary Table 5. Consensus clustering results of TARGET-NB cohort based on the FGES activity score.
	Time	Sur	Cluster
TARGET-30-PAPVFD-01A	4.83562	TRUE	1
TARGET-30-PARACS-01A	3.63836	FALSE	1
TARGET-30-PAPHPE-01A	1.28767	TRUE	1
TARGET-30-PAPTAN-01A	5.6274	FALSE	2
TARGET-30-PASEGA-01A	2.21644	TRUE	1
TARGET-30-PAPZYP-01A	6.53699	FALSE	2
TARGET-30-PANLET-01A	3.32055	TRUE	1
TARGET-30-PATAYJ-01A	4.77808	FALSE	1
TARGET-30-PANNMS-01A	9.6137	FALSE	1
TARGET-30-PARDCK-01A	8.19452	FALSE	1
TARGET-30-PATDXG-01A	5.62192	FALSE	3
TARGET-30-PAIFXV-01A	3.05205	TRUE	1
TARGET-30-PATYIL-02A	1.31781	TRUE	3
TARGET-30-PARBAJ-02A	8.55342	FALSE	2
TARGET-30-PAPUWY-01A	3.01918	TRUE	1
TARGET-30-PASGAP-01A	4.2274	TRUE	1
TARGET-30-PAITCI-01A	0.887671	TRUE	2
TARGET-30-PATFCY-01A	2.15616	TRUE	3
TARGET-30-PALKUC-01A	12.0521	FALSE	2
TARGET-30-PARZCJ-01A	6.67123	FALSE	2
TARGET-30-PARFWB-01A	5.03014	TRUE	1
TARGET-30-PATEKG-01A	5.44658	FALSE	1
TARGET-30-PAKZRH-01A	9.15342	FALSE	2
TARGET-30-PASXRJ-01A	5.03288	FALSE	1
TARGET-30-PASGAP-02A	4.2274	TRUE	2
TARGET-30-PASTCN-01A	2.83014	TRUE	3
TARGET-30-PAPVXS-01A	0.613699	TRUE	1
TARGET-30-PAKYZS-01A	9.8274	FALSE	2
TARGET-30-PAPKWN-01A	1.27397	TRUE	2
TARGET-30-PAPEFE-01A	0.410959	TRUE	1
TARGET-30-PAUDDK-02A	4.1863	FALSE	1
TARGET-30-PANSBN-01A	2.29041	TRUE	2
TARGET-30-PATDWN-01A	0.761644	FALSE	3
TARGET-30-PATESI-01A	2.62466	TRUE	3
TARGET-30-PARJVP-01A	5.65479	FALSE	3
TARGET-30-PAISNS-01A	1.15342	TRUE	3
TARGET-30-PAPUNH-01A	8.10411	FALSE	1
TARGET-30-PAMEZH-01A	0.90411	TRUE	1
TARGET-30-PASNPG-01A	6.23014	FALSE	3
TARGET-30-PAMMXF-01A	0.539726	TRUE	3
TARGET-30-PARACM-01A	8.20274	FALSE	1
TARGET-30-PASVRU-01A	1.20548	TRUE	3
TARGET-30-PALUYS-01A	3.51781	TRUE	1
TARGET-30-PASFIC-01A	5.89589	FALSE	2
TARGET-30-PARHAM-02A	6.75616	TRUE	2
TARGET-30-PASZKE-01A	0.0219178	TRUE	3
TARGET-30-PASPER-01A	5.71781	FALSE	1
TARGET-30-PASCTR-01A	6.36986	FALSE	3
TARGET-30-PANZPV-01A	3.45479	TRUE	2
TARGET-30-PARSBI-01A	4.77534	TRUE	1
TARGET-30-PATGJU-01A	3.33973	FALSE	2
TARGET-30-PATYIL-01A	1.31781	TRUE	3
TARGET-30-PASUYG-01A	6.00822	FALSE	3
TARGET-30-PATBMM-01A	2.10411	FALSE	1
TARGET-30-PAPZYZ-01A	3.31233	FALSE	2
TARGET-30-PARBAJ-01A	8.55342	FALSE	2
TARGET-30-PAUDDK-01A	4.1863	FALSE	2
TARGET-30-PASXGP-01A	5.2	FALSE	3
TARGET-30-PANBSP-01A	1.80548	TRUE	3
TARGET-30-PASFGG-01A	1.91781	TRUE	1
TARGET-30-PAPICY-01A	0.561644	FALSE	1
TARGET-30-PASXHE-01A	5.74795	FALSE	1
TARGET-30-PARNNC-01A	7.15342	FALSE	1
TARGET-30-PALZZV-01A	5.29863	FALSE	3
TARGET-30-PARAMT-01A	1.35068	TRUE	3
TARGET-30-PALETP-01A	0.687671	TRUE	1
TARGET-30-PALNVP-01A	12.7808	FALSE	2
TARGET-30-PAPBGH-01A	1.98082	TRUE	3
nan	/	/	1
TARGET-30-PAMVRA-01A	6.66575	TRUE	3
TARGET-30-PALCBW-01A	12.5068	FALSE	2
TARGET-30-PATDXC-01A	2.50959	TRUE	1
TARGET-30-PASMNT-01A	4.64658	TRUE	1
TARGET-30-PANZVU-01A	2.5589	TRUE	1
TARGET-30-PASJZC-01A	5.70685	FALSE	2
TARGET-30-PASZPI-01A	2.77808	TRUE	1
TARGET-30-PASSWW-01A	5.73973	FALSE	3
TARGET-30-PALTEG-01A	1.50959	TRUE	1
TARGET-30-PAPTLV-01A	1.57534	TRUE	2
TARGET-30-PANRRW-01A	5.96712	FALSE	1
TARGET-30-PANYGR-01A	0.775342	TRUE	3
TARGET-30-PASHFA-01A	0.912329	TRUE	3
TARGET-30-PATHVK-01A	4.95068	FALSE	3
TARGET-30-PASNML-01A	5.9863	FALSE	3
TARGET-30-PANRVJ-01A	10.1973	FALSE	2
TARGET-30-PAPBZI-01A	1.17808	TRUE	3
TARGET-30-PAPTDH-01A	8.94247	FALSE	2
TARGET-30-PASMDM-01A	3.6274	FALSE	2
TARGET-30-PANWRR-01A	0.945205	TRUE	3
TARGET-30-PALBFW-01A	2.93973	TRUE	1
TARGET-30-PARZIP-01A	6.87945	FALSE	1
TARGET-30-PASNPG-02A	6.23014	FALSE	2
TARGET-30-PAMNLH-01A	2.29315	TRUE	3
TARGET-30-PATINJ-01A	2.25205	TRUE	1
TARGET-30-PALEVG-01A	13.5562	FALSE	3
TARGET-30-PASSRN-01A	6.10137	FALSE	2
TARGET-30-PASUCB-01A	5.4137	FALSE	3
TARGET-30-PALVKK-01A	2.83014	TRUE	2
TARGET-30-PALWVJ-01A	2.2	TRUE	2
TARGET-30-PARHAM-01A	6.75616	TRUE	2
TARGET-30-PATFXV-01A	0.810959	TRUE	3
TARGET-30-PATHKB-01A	5.47397	FALSE	3
TARGET-30-PAIPGU-01A	1.19452	TRUE	1
TARGET-30-PAPTCR-01A	1.24932	TRUE	2
TARGET-30-PASWFB-01A	0.238356	TRUE	3
TARGET-30-PAPKXS-01A	6.53151	TRUE	1
TARGET-30-PARDIW-01A	7.75068	FALSE	1
TARGET-30-PAPVEB-04A	3.31781	TRUE	3
TARGET-30-PASSRS-01A	3.6137	TRUE	3
TARGET-30-PAIVHE-01A	4.39726	TRUE	1
TARGET-30-PAPCTS-01A	7.22192	TRUE	3
TARGET-30-PALIIN-01A	3.82192	TRUE	1
TARGET-30-PANGXK-01A	10.389	FALSE	2
TARGET-30-PASMJG-01A	4.23014	TRUE	2
TARGET-30-PATCFL-01A	5.82192	FALSE	1
TARGET-30-PARKGJ-01A	4.48219	TRUE	2
TARGET-30-PANBMJ-01A	10.3452	TRUE	1
TARGET-30-PASNEF-01A	6.06301	FALSE	1
TARGET-30-PAMYCE-01A	2.72603	TRUE	1
TARGET-30-PAPLSD-01A	3.78904	TRUE	2
TARGET-30-PASWYR-01A	5.1863	FALSE	3
TARGET-30-PARGKK-01A	3.61918	TRUE	1
TARGET-30-PASWVY-01A	5.25479	FALSE	1
TARGET-30-PATNKP-02A	4.24384	TRUE	3
TARGET-30-PASNZU-01A	4.63562	TRUE	3
TARGET-30-PAPBJE-01A	9.49863	FALSE	2
TARGET-30-PASPBZ-01A	6.43014	FALSE	3
TARGET-30-PANZRV-01A	9.40822	FALSE	3
TARGET-30-PANXJL-01A	1.18082	FALSE	2
TARGET-30-PASXRG-01A	4.79178	FALSE	3
TARGET-30-PASCFC-01A	6.90959	FALSE	1
TARGET-30-PANBJH-01A	2.52055	TRUE	3
TARGET-30-PARVLK-01A	2.39726	TRUE	3
TARGET-30-PASRFS-01A	5.68493	FALSE	1
TARGET-30-PATGLU-01A	3.64384	TRUE	1
TARGET-30-PAMZMG-01A	2.09041	TRUE	3
TARGET-30-PATEPF-01A	0.832877	TRUE	3
TARGET-30-PASXIE-01A	5.81644	FALSE	3
TARGET-30-PANUIF-01A	10.2082	FALSE	2
TARGET-30-PARYNK-01A	6.4411	FALSE	1
TARGET-30-PASWIJ-01A	5.31507	FALSE	1
TARGET-30-PASTKC-01A	5.34795	FALSE	1
TARGET-30-PARBGP-01A	5.5863	TRUE	1
TARGET-30-PALXTB-01A	12.6603	FALSE	1
TARGET-30-PANJLH-01A	1.36986	TRUE	2
TARGET-30-PASGUT-01A	1.09863	FALSE	1
TARGET-30-PARZHA-01A	6.81918	FALSE	1
TARGET-30-PAPVRN-01A	7.91507	FALSE	1
TARGET-30-PAPUEB-01A	7.59452	FALSE	1
TARGET-30-PARFRE-01A	6.71507	FALSE	3
TARGET-30-PAMZGT-01A	10.474	FALSE	2
