# Supplementary material for: Immune microenvironment heterogeneity reveals distinct subtypes in neuroblastoma: insights into prognosis and therapeutic targets
Source: Aging (Albany NY). 2023 Nov 27;15(22):13345–67. doi: 10.18632/aging.205246 (PMC10713432; doi:10.18632/aging.205246)
Supplement: Supplementary Table 6 [file aging-15-205246-s006.xlsx]

## Sheet: Sheet 1
Supplementary Table 6. Differentially expressed genes among Fges-derived subtypes.
p_val	avg_log2FC	pct.1	pct.2	p_val_adj	cluster	gene
1.5735e-20	0.547266	1	1	9.1872e-16	C1	FOXP3
3.19334e-20	0.642924	1	1	1.8645e-15	C1	TIGIT
1.70579e-19	0.894715	1	1	9.95959e-15	C1	TBC1D10C
1.95851e-19	0.91804	1	1	1.14352e-14	C1	CD2
2.48927e-19	0.897656	1	0.944	1.45341e-14	C1	SIRPG
3.38242e-19	0.277746	1	0.921	1.97489e-14	C1	GPR55
3.51427e-19	0.995864	1	1	2.05187e-14	C1	CD3E
4.03014e-19	0.983948	1	1	2.35308e-14	C1	CD3D
4.17038e-19	0.89156	1	1	2.43496e-14	C1	CD5
4.31423e-19	0.746054	1	0.966	2.51895e-14	C1	UBASH3A
6.49702e-19	0.541106	1	0.978	3.79341e-14	C1	PYHIN1
8.52574e-19	0.743178	1	1	4.97793e-14	C1	ITGAL
1.1177e-18	0.742432	1	1	6.52594e-14	C1	SKAP1
1.27931e-18	0.712134	1	0.989	7.46953e-14	C1	CD96
1.36857e-18	0.893117	1	1	7.99064e-14	C1	CD8B
1.36857e-18	0.816026	1	1	7.99064e-14	C1	IL2RG
1.51409e-18	0.947896	1	1	8.84032e-14	C1	LCK
1.56592e-18	0.850263	1	1	9.14291e-14	C1	SLAMF6
1.79132e-18	0.793812	1	1	1.0459e-13	C1	TRAF3IP3
1.91575e-18	0.826215	1	1	1.11855e-13	C1	CD6
2.19076e-18	0.631361	1	0.989	1.27912e-13	C1	NCR3
3.27086e-18	0.800382	1	0.966	1.90976e-13	C1	SH2D1A
3.61564e-18	0.558917	1	1	2.11107e-13	C1	RASGRP1
4.71703e-18	0.899957	1	1	2.75413e-13	C1	ZAP70
4.87615e-18	0.805291	1	1	2.84704e-13	C1	SYTL1
5.21044e-18	0.79034	1	1	3.04222e-13	C1	SPN
5.38596e-18	0.616274	1	1	3.1447e-13	C1	SP140
9.03641e-18	0.736642	1	0.888	5.27609e-13	C1	P2RY10
9.13397e-18	0.684274	1	1	5.33305e-13	C1	RAC2
9.4394e-18	0.810721	1	1	5.51138e-13	C1	IKZF3
9.74858e-18	0.807514	1	0.955	5.6919e-13	C1	FCRL3
1.07624e-17	0.664676	1	0.966	6.28387e-13	C1	TRAT1
1.2967e-17	0.463533	1	0.888	7.57103e-13	C1	THEMIS
1.54342e-17	0.599087	1	0.989	9.01158e-13	C1	GRAP2
1.57233e-17	0.666666	1	0.876	9.18038e-13	C1	CD40LG
1.6476e-17	0.694906	1	1	9.61985e-13	C1	RHOH
1.6476e-17	0.514695	1	0.989	9.61985e-13	C1	LAX1
1.75871e-17	0.569989	1	0.989	1.02686e-12	C1	GFI1
2.06988e-17	0.713089	1	0.989	1.20854e-12	C1	CD3G
2.11551e-17	0.626616	1	0.82	1.23518e-12	C1	GPR174
2.51546e-17	0.50169	1	0.978	1.4687e-12	C1	LY9
2.51562e-17	0.766869	1	1	1.46879e-12	C1	CD247
2.68428e-17	0.717724	1	1	1.56727e-12	C1	C11orf21
2.771e-17	0.686676	1	0.955	1.6179e-12	C1	ICOS
2.77275e-17	0.718551	1	1	1.61893e-12	C1	ITK
2.86391e-17	0.602862	1	0.978	1.67215e-12	C1	SLAMF1
3.15631e-17	0.98172	1	1	1.84288e-12	C1	FAIM3
3.4779e-17	0.908665	1	1	2.03064e-12	C1	LTB
4.5021e-17	0.7459	1	1	2.62864e-12	C1	CD27
5.11736e-17	0.770994	1	0.955	2.98788e-12	C1	GPR171
6.41073e-17	0.708943	1	1	3.74303e-12	C1	GBP5
6.61949e-17	0.746128	1	1	3.86492e-12	C1	ACAP1
7.27788e-17	0.437632	1	0.944	4.24933e-12	C1	CNR2
7.5237e-17	0.601971	1	1	4.39286e-12	C1	CCDC88B
8.2808e-17	0.713817	1	1	4.83491e-12	C1	TMC8
8.82678e-17	0.622353	1	1	5.15369e-12	C1	FGD3
9.11293e-17	0.628856	1	1	5.32077e-12	C1	CD38
9.40593e-17	0.361123	1	0.966	5.49184e-12	C1	ZNF831
9.40822e-17	0.899428	1	1	5.49318e-12	C1	CCR7
9.40822e-17	0.583517	1	1	5.49318e-12	C1	SLA2
1.06861e-16	0.766734	1	0.978	6.23928e-12	C1	CXCR3
1.21362e-16	0.572305	1	1	7.08598e-12	C1	SEPT1
1.29313e-16	0.833515	1	0.978	7.55017e-12	C1	SIT1
1.42231e-16	0.693982	1	0.989	8.30446e-12	C1	TESPA1
1.51536e-16	0.703134	1	1	8.84775e-12	C1	CD52
1.51536e-16	0.608123	1	1	8.84775e-12	C1	DAPP1
2.43302e-16	0.693136	1	1	1.42057e-11	C1	IKZF1
2.51077e-16	0.862091	1	0.989	1.46596e-11	C1	IDO1
2.51077e-16	0.761861	1	1	1.46596e-11	C1	C16orf54
2.59095e-16	0.938705	1	1	1.51278e-11	C1	ANO9
2.66481e-16	0.709903	1	0.921	1.5559e-11	C1	CTLA4
2.84697e-16	0.487407	1	1	1.66226e-11	C1	NLRC3
2.93166e-16	0.366625	1	0.933	1.71171e-11	C1	CCR4
3.11758e-16	0.797273	1	0.921	1.82026e-11	C1	GZMK
3.7733e-16	0.494593	1	0.966	2.20312e-11	C1	ZBP1
3.89401e-16	0.739194	1	1	2.2736e-11	C1	PTPRC
4.14502e-16	0.779063	1	0.989	2.42015e-11	C1	S1PR4
4.14502e-16	0.530289	1	0.989	2.42015e-11	C1	BTLA
4.53686e-16	0.286948	1	0.921	2.64894e-11	C1	CPA5
5.48662e-16	0.680168	1	1	3.20347e-11	C1	LTA
5.65986e-16	0.798459	1	1	3.30462e-11	C1	PARP15
6.02265e-16	0.826868	1	1	3.51645e-11	C1	CD7
6.40834e-16	0.831157	1	1	3.74164e-11	C1	HSH2D
7.48226e-16	0.3865	1	1	4.36867e-11	C1	PIM2
8.73306e-16	0.719643	1	1	5.09897e-11	C1	DENND1C
1.08361e-15	0.496357	1	0.978	6.32686e-11	C1	ICAM3
1.18843e-15	0.601077	1	0.989	6.93891e-11	C1	ITGB7
1.30316e-15	0.707145	1	1	7.60877e-11	C1	CD48
1.38564e-15	0.592376	1	1	8.09032e-11	C1	IL16
1.42846e-15	0.534331	1	0.966	8.34036e-11	C1	TTC24
1.47325e-15	0.705114	1	1	8.60187e-11	C1	DENND2D
2.00007e-15	0.294942	1	0.989	1.16778e-10	C1	SAMD3
2.06153e-15	0.956929	1	0.966	1.20367e-10	C1	CCL19
2.06199e-15	0.540288	1	1	1.20394e-10	C1	PTPN22
2.25933e-15	0.829597	1	0.989	1.31916e-10	C1	IL24
2.40097e-15	0.380672	1	0.978	1.40185e-10	C1	SLFN12L
2.63034e-15	0.563277	1	1	1.53577e-10	C1	WDFY4
2.71144e-15	0.633378	1	1	1.58313e-10	C1	CARD11
3.25236e-15	0.64245	1	1	1.89895e-10	C1	GZMM
3.35231e-15	0.448442	1	1	1.95731e-10	C1	FAM159A
3.56116e-15	0.757368	1	0.978	2.07926e-10	C1	POU2AF1
3.56136e-15	0.844785	1	1	2.07937e-10	C1	IL7R
3.899e-15	0.644618	1	0.978	2.27651e-10	C1	GPR18
4.14088e-15	0.459436	1	0.966	2.41774e-10	C1	TBX21
4.81512e-15	0.558775	1	1	2.81141e-10	C1	TSPAN32
5.2697e-15	0.661729	1	1	3.07682e-10	C1	PRF1
5.85107e-15	0.521874	1	0.865	3.41627e-10	C1	TNFRSF17
6.30245e-15	0.48293	1	0.944	3.67981e-10	C1	EOMES
6.30923e-15	0.599549	1	1	3.68377e-10	C1	SNX20
6.5011e-15	0.466757	1	0.989	3.7958e-10	C1	GCSAM
6.69871e-15	0.317067	1	1	3.91118e-10	C1	LPXN
6.90223e-15	0.893161	1	1	4.03001e-10	C1	SELL
7.11183e-15	0.595646	1	1	4.15239e-10	C1	MAP4K1
7.77895e-15	0.647218	1	1	4.5419e-10	C1	PTPN7
8.01302e-15	0.262712	1	0.966	4.67856e-10	C1	COL19A1
8.24872e-15	0.597242	1	0.944	4.81618e-10	C1	FCRL5
8.25577e-15	0.428756	1	0.966	4.8203e-10	C1	CRTAM
8.50757e-15	0.534277	1	1	4.96732e-10	C1	DEF6
9.30326e-15	0.4899	1	1	5.43189e-10	C1	AIM2
9.58442e-15	0.332975	1	1	5.59606e-10	C1	CORO1A
1.0479e-14	0.438391	1	1	6.1184e-10	C1	PATL2
1.14533e-14	0.4245	1	0.966	6.68724e-10	C1	CD244
1.14557e-14	0.459564	1	1	6.68865e-10	C1	ASB2
1.18008e-14	0.780101	1	1	6.89012e-10	C1	GP1BA
1.32862e-14	0.968017	1	1	7.75743e-10	C1	MZB1
1.36855e-14	0.621659	1	1	7.99052e-10	C1	FYB
1.36855e-14	0.524833	1	1	7.99052e-10	C1	PTPN6
1.53363e-14	0.442254	1	0.91	8.95439e-10	C1	XCR1
1.54038e-14	0.537711	1	1	8.99382e-10	C1	IL21R
1.58655e-14	1.03152	1	1	9.26341e-10	C1	CD79A
1.58655e-14	0.654968	1	0.989	9.26341e-10	C1	BANK1
1.7334e-14	0.676391	1	1	1.01208e-09	C1	CYTIP
1.95006e-14	1.00013	1	0.978	1.13858e-09	C1	CD19
2.06834e-14	0.585982	1	1	1.20764e-09	C1	LAMP3
2.13004e-14	0.539618	1	1	1.24366e-09	C1	ARHGAP30
2.19354e-14	0.641827	1	0.989	1.28074e-09	C1	PLAC8
2.19354e-14	0.481559	1	1	1.28074e-09	C1	IL12RB1
2.25892e-14	0.629979	1	1	1.31891e-09	C1	AMICA1
2.25892e-14	0.596437	1	1	1.31891e-09	C1	PDCD1
2.39546e-14	0.657117	1	1	1.39864e-09	C1	ARHGAP9
2.39546e-14	0.572933	1	1	1.39864e-09	C1	BIN2
2.46674e-14	0.654726	1	1	1.44026e-09	C1	CST7
2.54011e-14	0.603107	1	1	1.48309e-09	C1	PSD4
2.61562e-14	0.611585	1	1	1.52718e-09	C1	SASH3
2.69335e-14	0.631054	1	1	1.57256e-09	C1	PDE6G
2.85567e-14	0.299452	1	1	1.66734e-09	C1	MAP4K2
2.9404e-14	0.789884	1	0.989	1.71681e-09	C1	VPREB3
3.71341e-14	0.558369	1	1	2.16815e-09	C1	CD72
3.82311e-14	0.694758	1	1	2.2322e-09	C1	CD37
4.68542e-14	0.579732	1	1	2.73568e-09	C1	RASSF5
6.00776e-14	0.297013	1	0.809	3.50775e-09	C1	TNFRSF13B
7.4392e-14	0.531004	1	1	4.34353e-09	C1	RBP5
7.4392e-14	0.391704	1	1	4.34353e-09	C1	CD8A
8.58912e-14	0.52332	1	1	5.01493e-09	C1	MCOLN2
8.89477e-14	0.412605	1	0.843	5.19339e-09	C1	TREML2
9.36113e-14	0.556867	1	1	5.46569e-09	C1	PSTPIP1
9.55549e-14	0.945353	1	0.888	5.57916e-09	C1	FCRL1
1.11154e-13	0.70259	1	0.989	6.48992e-09	C1	GZMA
1.21098e-13	0.65692	1	1	7.07057e-09	C1	IL2RB
1.43543e-13	0.452499	1	0.944	8.38104e-09	C1	IL17REL
1.43682e-13	0.411564	1	1	8.38917e-09	C1	TRABD2A
1.43682e-13	0.403408	1	1	8.38917e-09	C1	CFP
1.61994e-13	0.916337	0.984	0.899	9.45834e-09	C1	CR2
1.6274e-13	0.801279	1	0.854	9.50189e-09	C1	FCRL2
1.64954e-13	0.30638	1	0.91	9.63116e-09	C1	ARRDC5
1.96329e-13	0.64569	1	1	1.1463e-08	C1	CTSW
2.01963e-13	0.363687	1	1	1.1792e-08	C1	FMNL1
2.11478e-13	0.392317	1	0.876	1.23475e-08	C1	TIFAB
2.13703e-13	0.37511	1	0.978	1.24775e-08	C1	IL18RAP
2.13713e-13	0.606049	1	1	1.24781e-08	C1	RASAL3
2.14003e-13	1.3119	0.968	0.73	1.2495e-08	C1	FDCSP
2.42781e-13	0.330824	1	0.865	1.41753e-08	C1	FASLG
2.46107e-13	0.473347	1	1	1.43694e-08	C1	GPR132
2.8331e-13	0.614351	1	1	1.65416e-08	C1	RUNX3
2.8331e-13	0.450492	1	1	1.65416e-08	C1	KLHL6
2.91388e-13	0.529836	1	1	1.70133e-08	C1	MYO1G
3.17003e-13	0.259148	1	1	1.85089e-08	C1	KLRD1
3.44826e-13	0.780309	1	1	2.01334e-08	C1	LGALS2
3.44826e-13	0.551659	1	1	2.01334e-08	C1	PCED1B
3.64522e-13	1.06025	1	0.955	2.12833e-08	C1	PLA2G2D
3.64676e-13	0.613658	1	0.978	2.12923e-08	C1	TLR10
4.82167e-13	0.563471	1	0.989	2.81523e-08	C1	CXorf65
5.38932e-13	0.57437	1	1	3.14666e-08	C1	BATF
5.54119e-13	0.463712	1	1	3.23534e-08	C1	WAS
6.02218e-13	0.68609	1	0.978	3.51617e-08	C1	STAP1
6.02245e-13	0.780574	1	1	3.51633e-08	C1	FAM129C
6.02245e-13	0.479549	1	1	3.51633e-08	C1	LCP1
6.02245e-13	0.45551	1	1	3.51633e-08	C1	HMHA1
6.02742e-13	0.480372	0.984	0.674	3.51923e-08	C1	CD1A
6.91728e-13	0.616373	1	0.989	4.03879e-08	C1	IRF4
7.726e-13	0.653585	1	1	4.51098e-08	C1	SLAMF7
7.726e-13	0.478697	1	1	4.51098e-08	C1	GPR114
8.62576e-13	0.92547	1	0.966	5.03632e-08	C1	FCER2
8.62733e-13	0.456383	1	1	5.03724e-08	C1	DGKA
9.3703e-13	0.917251	1	1	5.47104e-08	C1	CD22
1.0176e-12	0.539246	1	1	5.94144e-08	C1	NCF1
1.0176e-12	0.462803	1	1	5.94144e-08	C1	CD53
1.04593e-12	0.468672	1	1	6.1069e-08	C1	C1orf228
1.26717e-12	0.427922	1	1	7.3986e-08	C1	CEACAM1
1.61977e-12	0.440201	1	0.966	9.45738e-08	C1	CXCR6
1.7107e-12	0.511788	1	1	9.98829e-08	C1	PARVG
1.90717e-12	0.471912	1	0.989	1.11354e-07	C1	FUT7
1.95964e-12	0.627631	1	0.989	1.14418e-07	C1	SUSD3
2.06888e-12	0.496798	1	1	1.20796e-07	C1	SELPLG
2.1837e-12	0.353421	1	0.966	1.275e-07	C1	WNT10A
2.18408e-12	0.406939	1	1	1.27522e-07	C1	ZC3H12D
2.24392e-12	1.15397	1	0.978	1.31016e-07	C1	MS4A1
2.30557e-12	0.581552	1	1	1.34615e-07	C1	CCL5
2.30557e-12	0.416163	1	1	1.34615e-07	C1	GHRL
2.43368e-12	0.538332	1	1	1.42095e-07	C1	EVI2B
2.49651e-12	0.422568	1	0.933	1.45764e-07	C1	APOBEC3H
2.56876e-12	0.407388	1	1	1.49982e-07	C1	LY75
2.63261e-12	0.786765	1	0.921	1.5371e-07	C1	UBD
2.63261e-12	0.373911	1	0.921	1.5371e-07	C1	CLEC9A
2.78528e-12	0.492361	1	1	1.62624e-07	C1	NCKAP1L
3.01966e-12	0.422637	1	1	1.76309e-07	C1	JAK3
3.18656e-12	0.526573	1	1	1.86053e-07	C1	DPEP2
3.35742e-12	0.463226	1	0.933	1.9603e-07	C1	CCL22
3.45398e-12	0.561868	1	0.989	2.01668e-07	C1	TMIGD2
3.74338e-12	0.406988	1	1	2.18565e-07	C1	SCIMP
3.84503e-12	0.475979	1	0.989	2.245e-07	C1	TNFAIP8L2
3.84503e-12	0.450189	1	1	2.245e-07	C1	MPEG1
4.58029e-12	0.280342	0.984	0.775	2.6743e-07	C1	CA6
4.63638e-12	0.597445	1	1	2.70704e-07	C1	GNLY
4.63638e-12	0.333125	1	1	2.70704e-07	C1	MEI1
4.89043e-12	0.66413	1	1	2.85537e-07	C1	CD69
4.89043e-12	0.449017	1	1	2.85537e-07	C1	CEACAM21
5.1581e-12	0.326182	1	1	3.01166e-07	C1	CASQ1
5.17317e-12	0.549496	0.984	0.843	3.02046e-07	C1	CLEC17A
5.4399e-12	0.61869	1	0.978	3.17619e-07	C1	SLC35F4
5.44013e-12	0.524952	1	1	3.17633e-07	C1	VAV1
5.44013e-12	0.51098	1	1	3.17633e-07	C1	ATP2A3
5.89171e-12	0.51214	1	1	3.44e-07	C1	NLRC5
6.05026e-12	0.410412	1	1	3.53256e-07	C1	ARHGAP25
6.21298e-12	0.481931	1	1	3.62757e-07	C1	CIITA
6.7273e-12	0.893993	1	0.989	3.92787e-07	C1	CXCL9
6.7273e-12	0.451591	1	1	3.92787e-07	C1	P2RY8
7.28329e-12	0.577897	1	1	4.25249e-07	C1	NKG7
8.09177e-12	0.338331	1	0.955	4.72454e-07	C1	TMPRSS3
8.09513e-12	0.381104	1	1	4.72651e-07	C1	CD274
8.76013e-12	0.43776	1	0.966	5.11478e-07	C1	TNFRSF9
9.99325e-12	0.645014	1	0.978	5.83476e-07	C1	IFNLR1
1.02593e-11	0.597555	1	0.978	5.99009e-07	C1	CLEC10A
1.05327e-11	0.486573	1	1	6.14971e-07	C1	TAGAP
1.23244e-11	0.310185	1	0.966	7.19582e-07	C1	ERMN
1.40469e-11	0.522544	1	1	8.20158e-07	C1	APBB1IP
1.47992e-11	0.490359	1	1	8.64078e-07	C1	FGD2
1.47992e-11	0.466318	1	1	8.64078e-07	C1	BTK
1.55908e-11	0.641085	1	1	9.103e-07	C1	BIRC3
1.59956e-11	0.605056	1	0.955	9.33933e-07	C1	CHI3L2
1.68566e-11	0.45372	1	1	9.84206e-07	C1	HLA-DMB
1.68566e-11	0.430488	1	1	9.84206e-07	C1	ANXA2R
1.68566e-11	0.309533	1	1	9.84206e-07	C1	SOWAHD
1.82229e-11	0.298213	1	1	1.06398e-06	C1	FCHO1
1.87019e-11	0.485181	1	1	1.09195e-06	C1	TNFRSF18
1.91933e-11	0.471301	1	1	1.12064e-06	C1	AOAH
1.96974e-11	0.483111	1	1	1.15007e-06	C1	IKBKE
2.02144e-11	0.482509	1	1	1.18026e-06	C1	DOCK8
2.07446e-11	0.413657	1	1	1.21122e-06	C1	SLA
2.12885e-11	0.518791	1	0.989	1.24297e-06	C1	SSTR3
2.12885e-11	0.458404	1	1	1.24297e-06	C1	DOCK2
2.42051e-11	0.980224	0.984	0.955	1.41326e-06	C1	TCL1A
2.42205e-11	0.295682	1	0.966	1.41416e-06	C1	FLT3
2.54218e-11	0.6358	1	0.91	1.4843e-06	C1	CD1E
2.55065e-11	0.845108	1	1	1.48925e-06	C1	IGJ
2.55065e-11	0.722687	1	1	1.48925e-06	C1	CD79B
2.75542e-11	0.425715	1	0.978	1.60881e-06	C1	RUFY4
2.8211e-11	0.401447	1	0.921	1.64716e-06	C1	CCR2
2.8269e-11	0.861359	1	0.966	1.65054e-06	C1	IGLL5
2.85966e-11	0.355505	0.984	0.865	1.66967e-06	C1	TRPC5
2.90098e-11	0.461869	1	1	1.69379e-06	C1	TMEM156
3.38389e-11	0.348213	1	1	1.97575e-06	C1	CR1
3.47168e-11	0.279803	1	1	2.02701e-06	C1	C15orf27
3.654e-11	0.582881	1	1	2.13346e-06	C1	FAM65B
3.654e-11	0.446132	1	1	2.13346e-06	C1	DOK2
3.73507e-11	0.526803	0.935	0.674	2.18079e-06	C1	CD1B
4.0472e-11	0.621145	1	1	2.36304e-06	C1	HLA-DOB
4.0472e-11	0.501517	1	0.989	2.36304e-06	C1	CCR5
4.1518e-11	0.483539	1	1	2.42411e-06	C1	GIMAP2
4.25903e-11	0.418361	1	1	2.48672e-06	C1	CD84
4.36898e-11	0.420575	1	1	2.55092e-06	C1	GIMAP5
4.4817e-11	0.663038	1	1	2.61673e-06	C1	DNASE1L3
4.96155e-11	0.320067	1	0.978	2.8969e-06	C1	DNAJC5B
5.77659e-11	0.622679	1	0.966	3.37278e-06	C1	GZMB
5.90665e-11	0.540097	1	0.91	3.44872e-06	C1	MYH6
5.92563e-11	0.409159	1	1	3.4598e-06	C1	HLA-F
6.55628e-11	0.535184	1	1	3.82802e-06	C1	HLA-DQA1
6.55628e-11	0.436138	1	1	3.82802e-06	C1	UNC13D
6.72393e-11	0.466623	1	1	3.9259e-06	C1	PLEK
7.0719e-11	0.351944	1	1	4.12907e-06	C1	RASGRP2
7.62711e-11	0.29295	1	1	4.45324e-06	C1	RPS6KA1
7.82148e-11	0.486329	1	1	4.56673e-06	C1	ZNF467
7.82148e-11	0.454422	1	1	4.56673e-06	C1	GIMAP7
7.82148e-11	0.309496	1	1	4.56673e-06	C1	CD200R1
8.02069e-11	0.406972	1	1	4.68304e-06	C1	DPP6
8.22487e-11	0.655516	1	1	4.80225e-06	C1	CPA4
8.62135e-11	0.628933	1	0.91	5.03375e-06	C1	CD1C
9.8034e-11	0.412317	1	1	5.72391e-06	C1	FAM26F
9.85703e-11	0.333185	0.903	0.685	5.75522e-06	C1	KRT72
1.00518e-10	0.428113	1	1	5.86896e-06	C1	CD28
1.11085e-10	0.427752	1	0.989	6.48595e-06	C1	FCRL6
1.16769e-10	0.611596	1	1	6.81778e-06	C1	ADAMDEC1
1.16769e-10	0.499317	1	1	6.81778e-06	C1	HCST
1.19716e-10	0.426424	1	1	6.98987e-06	C1	IL10RA
1.19716e-10	0.410035	1	1	6.98987e-06	C1	CD300LF
1.3225e-10	0.481856	1	1	7.72166e-06	C1	IRF8
1.38989e-10	0.257307	1	1	8.11512e-06	C1	ARHGAP4
1.46057e-10	0.373934	1	0.978	8.52785e-06	C1	PRKCQ
1.46063e-10	0.277062	1	1	8.52816e-06	C1	CARNS1
1.53488e-10	0.466128	1	1	8.96171e-06	C1	KLRB1
1.53488e-10	0.417755	1	1	8.96171e-06	C1	APOBEC3D
1.53488e-10	0.384109	1	0.989	8.96171e-06	C1	C11orf94
1.61282e-10	0.274006	1	1	9.41678e-06	C1	IDNK
1.69462e-10	0.307656	1	1	9.89441e-06	C1	CYB561D2
1.78048e-10	0.553497	1	1	1.03957e-05	C1	ZNF683
1.78048e-10	0.419396	1	0.989	1.03957e-05	C1	SIGLEC8
1.78048e-10	0.365964	1	1	1.03957e-05	C1	IGSF6
1.82498e-10	0.486171	1	0.989	1.06555e-05	C1	KCNJ10
1.87057e-10	0.509193	1	1	1.09217e-05	C1	TMEM229B
2.01384e-10	0.537494	1	0.966	1.17582e-05	C1	XCL2
2.01413e-10	0.826303	1	0.989	1.17599e-05	C1	CCL21
2.27756e-10	0.486513	1	0.978	1.3298e-05	C1	PRR33
2.27764e-10	0.55498	1	1	1.32985e-05	C1	CETP
2.27764e-10	0.449375	1	1	1.32985e-05	C1	CNGB1
2.27764e-10	0.376788	1	1	1.32985e-05	C1	RIPK3
2.33425e-10	0.426058	1	1	1.3629e-05	C1	ITGAX
2.38744e-10	0.359167	0.984	0.933	1.39395e-05	C1	KLRF1
2.39223e-10	0.455041	1	1	1.39675e-05	C1	LRMP
2.72114e-10	0.387321	0.952	0.921	1.58879e-05	C1	FAM153C
2.77082e-10	0.303696	1	1	1.6178e-05	C1	GPR113
2.77082e-10	0.292744	1	1	1.6178e-05	C1	DNHD1
2.83936e-10	0.393818	1	1	1.65782e-05	C1	TNFSF13B
2.98146e-10	0.487135	1	1	1.74078e-05	C1	PLA1A
3.03926e-10	0.423214	0.919	0.562	1.77453e-05	C1	DNTT
3.5356e-10	0.384836	1	1	2.06433e-05	C1	GYLTL1B
3.99175e-10	0.265093	1	1	2.33066e-05	C1	CYSLTR1
4.18987e-10	0.462215	1	1	2.44634e-05	C1	TC2N
4.18987e-10	0.444528	1	1	2.44634e-05	C1	PYGM
4.2925e-10	0.361495	1	1	2.50626e-05	C1	APOBEC3G
4.39758e-10	0.376289	1	1	2.56762e-05	C1	IL27RA
4.50517e-10	0.391973	1	1	2.63043e-05	C1	SLAMF8
4.50517e-10	0.250117	1	1	2.63043e-05	C1	CD74
4.61533e-10	0.483611	1	1	2.69475e-05	C1	EBI3
4.72484e-10	0.530771	1	0.944	2.75869e-05	C1	PYY
4.77162e-10	0.636696	0.984	0.921	2.786e-05	C1	CCL24
4.84024e-10	0.559396	1	0.944	2.82607e-05	C1	CXCL11
5.20677e-10	0.256678	1	0.989	3.04008e-05	C1	CLECL1
5.33364e-10	0.422164	1	1	3.11415e-05	C1	LILRB1
5.46352e-10	0.316653	1	1	3.18998e-05	C1	AP1G2
5.7216e-10	0.843769	1	0.921	3.34067e-05	C1	BRINP3
5.87195e-10	0.719208	1	1	3.42846e-05	C1	ITGA8
6.0146e-10	0.289169	1	1	3.51175e-05	C1	GPSM3
6.31013e-10	0.4815	1	1	3.68429e-05	C1	CCDC69
6.46293e-10	0.792632	1	0.978	3.77351e-05	C1	FAM153A
6.46315e-10	0.415776	1	1	3.77364e-05	C1	FAM78A
6.78014e-10	0.359926	1	1	3.95872e-05	C1	CD4
7.00323e-10	0.272518	1	0.843	4.08897e-05	C1	STYK1
7.46028e-10	0.496541	1	1	4.35583e-05	C1	OSBPL3
7.63826e-10	0.653202	0.952	0.787	4.45975e-05	C1	TTLL6
7.66254e-10	0.282161	0.935	0.562	4.47393e-05	C1	FCAMR
7.82486e-10	0.388443	1	1	4.5687e-05	C1	MYO1F
8.19713e-10	0.400432	1	0.933	4.78606e-05	C1	LRCOL1
8.2068e-10	0.382063	1	1	4.79171e-05	C1	APOBR
8.2068e-10	0.345426	1	1	4.79171e-05	C1	SLC9A5
8.4034e-10	0.293442	1	0.966	4.90649e-05	C1	PCP2
8.40453e-10	0.644064	1	1	4.90715e-05	C1	SPIB
8.40453e-10	0.296411	1	1	4.90715e-05	C1	PTK2B
9.01542e-10	0.58509	1	0.933	5.26384e-05	C1	FCRLA
9.02601e-10	0.669159	1	0.989	5.27002e-05	C1	CXCL10
9.02601e-10	0.461923	1	1	5.27002e-05	C1	HLA-DQB1
9.465e-10	0.293952	1	1	5.52633e-05	C1	FUCA1
1.01628e-09	0.297081	1	0.989	5.93373e-05	C1	KHDC1L
1.06555e-09	0.548344	1	1	6.22145e-05	C1	IL4I1
1.09106e-09	0.610034	1	1	6.37037e-05	C1	CAMK2A
1.11716e-09	0.367535	1	1	6.52276e-05	C1	SERPINB9
1.14387e-09	0.319021	1	0.989	6.6787e-05	C1	TLR8
1.17104e-09	0.330452	1	0.966	6.83737e-05	C1	LILRA4
1.1712e-09	0.371558	1	1	6.83827e-05	C1	ACSL6
1.22774e-09	0.312136	1	0.978	7.16842e-05	C1	WNT10B
1.22778e-09	0.392356	1	1	7.16865e-05	C1	LST1
1.22778e-09	0.313333	1	1	7.16865e-05	C1	SPTBN4
1.22778e-09	0.304772	1	1	7.16865e-05	C1	ARHGAP27
1.22778e-09	0.268466	1	1	7.16865e-05	C1	ARAP2
1.25706e-09	0.377379	1	1	7.33963e-05	C1	HCLS1
1.28703e-09	0.41807	1	1	7.51457e-05	C1	CD180
1.31769e-09	0.472609	1	1	7.69358e-05	C1	IL18
1.31769e-09	0.433325	1	1	7.69358e-05	C1	ISG20
1.31769e-09	0.340048	1	1	7.69358e-05	C1	HLA-DPA1
1.35065e-09	0.374252	0.968	0.843	7.88605e-05	C1	NANOS2
1.414e-09	0.297079	1	1	8.25591e-05	C1	ELMO3
1.55315e-09	0.346903	1	1	9.06835e-05	C1	RASSF7
1.70251e-09	0.558864	1	0.921	9.94045e-05	C1	GZMH
1.82943e-09	0.503698	1	1	0.000106815	C1	IQCA1
1.82943e-09	0.324237	1	1	0.000106815	C1	FERMT3
1.87261e-09	0.402217	1	1	0.000109336	C1	SDK1
1.91679e-09	0.418428	1	1	0.000111916	C1	SYK
1.96199e-09	0.346184	1	1	0.000114555	C1	SIDT1
1.96199e-09	0.266711	1	1	0.000114555	C1	CCDC64
2.204e-09	0.597991	1	0.989	0.000128685	C1	FXYD7
2.204e-09	0.359509	1	1	0.000128685	C1	GAB3
2.36291e-09	0.354206	1	1	0.000137963	C1	AKNA
2.41832e-09	0.272611	1	1	0.000141199	C1	FAM117A
2.475e-09	0.411573	1	1	0.000144508	C1	GBP4
2.53216e-09	0.260353	1	0.955	0.000147845	C1	NCCRP1
2.53296e-09	0.372627	1	1	0.000147892	C1	CTSH
2.59061e-09	0.276299	0.984	0.955	0.000151258	C1	FAM71F1
2.59225e-09	0.333221	1	1	0.000151354	C1	AIM1
2.59225e-09	0.331604	1	1	0.000151354	C1	IL18R1
2.71491e-09	0.454564	1	1	0.000158516	C1	TCF7
2.71491e-09	0.261533	1	1	0.000158516	C1	TLR6
2.77835e-09	0.527113	1	1	0.000162219	C1	KCNH3
2.77835e-09	0.320165	1	1	0.000162219	C1	LAT
2.84322e-09	0.328286	1	1	0.000166007	C1	POU2F2
2.90957e-09	0.466801	1	1	0.000169881	C1	P2RY13
2.97742e-09	0.302486	1	0.989	0.000173843	C1	PM20D1
3.01738e-09	0.590003	0.968	0.775	0.000176176	C1	KRT9
3.04682e-09	0.36906	1	1	0.000177895	C1	CASP1
3.11769e-09	0.293119	1	0.978	0.000182032	C1	CLEC12A
3.11779e-09	0.410839	1	1	0.000182038	C1	ITGB2
3.11779e-09	0.385796	1	1	0.000182038	C1	HLA-DOA
3.11779e-09	0.365239	1	0.989	0.000182038	C1	P2RX1
3.19036e-09	0.557694	1	1	0.000186276	C1	RCAN3
3.19036e-09	0.347604	1	1	0.000186276	C1	INPP5D
3.19036e-09	0.342544	1	1	0.000186276	C1	TCAP
3.26458e-09	0.433284	1	1	0.000190609	C1	APOL3
3.26458e-09	0.309157	1	1	0.000190609	C1	LAT2
3.34049e-09	0.37027	1	1	0.000195041	C1	LCP2
3.34049e-09	0.362984	1	1	0.000195041	C1	CXorf21
3.49529e-09	0.433539	1	0.944	0.00020408	C1	PPP4R4
3.49748e-09	0.274738	1	1	0.000204207	C1	GPR162
3.57853e-09	0.740007	1	0.978	0.00020894	C1	CXCL13
3.57864e-09	0.483373	1	1	0.000208946	C1	FAM46C
3.74651e-09	0.369151	1	1	0.000218748	C1	SIGLEC7
3.74651e-09	0.367887	1	1	0.000218748	C1	SIGLEC10
3.8333e-09	0.340699	1	1	0.000223815	C1	FLT3LG
3.8333e-09	0.302655	1	1	0.000223815	C1	GNGT2
4.01278e-09	0.458257	1	1	0.000234294	C1	CSF2RB
4.01278e-09	0.296836	1	1	0.000234294	C1	UFSP1
4.10556e-09	0.41836	1	1	0.000239711	C1	DERL3
4.20043e-09	0.298896	1	1	0.00024525	C1	SLC37A1
4.29743e-09	0.433813	1	1	0.000250914	C1	EXOC3L4
4.39186e-09	0.400476	0.968	0.955	0.000256428	C1	P2RX2
4.3966e-09	0.371759	1	0.989	0.000256705	C1	VNN2
4.49801e-09	0.446529	1	1	0.000262625	C1	SSPO
4.662e-09	0.357543	0.952	0.618	0.0002722	C1	IFNG
4.70769e-09	0.354949	1	1	0.000274868	C1	C10orf128
4.81607e-09	0.304656	1	1	0.000281196	C1	CLCN1
4.81607e-09	0.297614	1	1	0.000281196	C1	GSAP
5.15597e-09	0.40431	1	0.989	0.000301042	C1	TXK
5.51917e-09	0.342147	1	1	0.000322248	C1	TNFSF8
5.64568e-09	0.320293	1	1	0.000329634	C1	GPR65
5.64568e-09	0.268183	1	1	0.000329634	C1	EPHA1
5.90722e-09	0.2535	1	1	0.000344905	C1	DHRS11
6.18052e-09	0.336272	1	1	0.000360862	C1	THEMIS2
6.46611e-09	0.418991	1	1	0.000377537	C1	LYZ
6.46611e-09	0.401675	1	1	0.000377537	C1	PLA2G7
6.61368e-09	0.380429	1	1	0.000386153	C1	SOCS1
6.61368e-09	0.340692	1	1	0.000386153	C1	GPR35
6.91871e-09	0.420567	1	1	0.000403963	C1	GIMAP1
7.07631e-09	0.380743	1	1	0.000413164	C1	TMC6
7.07631e-09	0.373547	1	1	0.000413164	C1	NPY
7.23653e-09	0.387188	1	0.966	0.000422519	C1	IGLL1
7.74236e-09	0.361556	1	1	0.000452053	C1	TNFRSF11A
7.74236e-09	0.356303	1	1	0.000452053	C1	CYBB
7.91817e-09	0.354907	1	1	0.000462318	C1	ACKR1
7.91817e-09	0.262293	1	1	0.000462318	C1	RGS14
8.09786e-09	0.392702	1	1	0.00047281	C1	EVI2A
8.09786e-09	0.321045	1	1	0.00047281	C1	HLA-DMA
8.46821e-09	0.385167	1	0.966	0.000494433	C1	PTCRA
8.46921e-09	0.270107	1	1	0.000494492	C1	HLA-DRB1
9.26224e-09	0.379668	1	1	0.000540794	C1	CBLN3
9.26224e-09	0.374848	1	1	0.000540794	C1	LAIR1
9.47151e-09	0.453213	1	1	0.000553013	C1	PRKCB
9.47151e-09	0.449758	1	1	0.000553013	C1	MMP25
9.68537e-09	0.327402	1	1	0.0005655	C1	PTGDR2
1.03555e-08	0.344545	1	1	0.000604626	C1	PIK3R5
1.05856e-08	0.590187	1	0.955	0.000618063	C1	HCRT
1.05887e-08	0.40849	1	1	0.000618244	C1	FGR
1.05887e-08	0.331583	1	1	0.000618244	C1	GIMAP4
1.08271e-08	0.340375	1	1	0.00063216	C1	EPX
1.15738e-08	0.425415	1	1	0.000675757	C1	KCND2
1.18336e-08	0.350416	1	1	0.000690929	C1	HCK
1.18336e-08	0.302066	1	1	0.000690929	C1	IRF5
1.20991e-08	0.505585	1	1	0.000706431	C1	CACNA1I
1.26476e-08	0.348849	1	1	0.000738456	C1	IRF1
1.32202e-08	0.33231	1	1	0.00077189	C1	CTSS
1.33986e-08	1.06113	0.919	0.719	0.000782302	C1	MUC15
1.35081e-08	0.608795	1	0.944	0.000788697	C1	INS
1.35155e-08	0.31694	1	0.978	0.000789131	C1	CCL17
1.35159e-08	0.385374	1	1	0.000789154	C1	MPP6
1.3818e-08	0.321764	1	1	0.000806792	C1	IL6R
1.47642e-08	0.27574	1	1	0.000862038	C1	PIK3CD
1.50934e-08	0.385445	1	0.989	0.000881256	C1	CHIT1
1.50934e-08	0.342003	1	1	0.000881256	C1	TFEC
1.54296e-08	0.268606	1	1	0.000900891	C1	TRAF1
1.61242e-08	0.275522	1	1	0.000941443	C1	HLA-DPB1
1.64828e-08	0.272428	1	1	0.000962378	C1	NR1H3
1.68394e-08	0.328411	1	0.944	0.000983204	C1	KLRK1
1.76055e-08	0.505668	1	0.989	0.00102793	C1	HLA-DQB2
1.76055e-08	0.432537	1	1	0.00102793	C1	KEL
1.76055e-08	0.361387	1	1	0.00102793	C1	ZNF804A
1.76055e-08	0.303783	1	1	0.00102793	C1	CORT
1.7994e-08	0.451086	1	0.966	0.00105061	C1	PAX5
1.83949e-08	0.312428	1	1	0.00107402	C1	PLCB2
2.00782e-08	0.639463	1	1	0.0011723	C1	PPP1R1A
2.05212e-08	0.352991	1	0.978	0.00119817	C1	HSPC047
2.05218e-08	0.32716	1	1	0.00119821	C1	SAMSN1
2.09726e-08	0.724877	0.984	0.978	0.00122453	C1	FAM153B
2.09749e-08	0.423021	1	1	0.00122466	C1	FCN1
2.09749e-08	0.423012	1	1	0.00122466	C1	BATF2
2.14378e-08	0.422148	1	1	0.00125169	C1	LILRB4
2.23934e-08	0.281685	1	1	0.00130748	C1	SPNS3
2.23934e-08	0.271799	1	1	0.00130748	C1	OPRL1
2.28866e-08	0.289048	1	1	0.00133628	C1	SYT3
2.33903e-08	0.550794	1	1	0.00136569	C1	IL7
2.33903e-08	0.398714	1	1	0.00136569	C1	CYTH4
2.44303e-08	0.401192	1	1	0.00142641	C1	COX6B2
2.44303e-08	0.35159	1	1	0.00142641	C1	IQSEC3
2.4967e-08	0.311243	1	1	0.00145775	C1	MADCAM1
2.69565e-08	0.31188	1	0.854	0.00157391	C1	C6orf222
2.72303e-08	0.471641	1	1	0.0015899	C1	PTER
2.78266e-08	0.420536	1	1	0.00162471	C1	RHPN1
2.90573e-08	0.365132	1	1	0.00169657	C1	PLCG2
2.98756e-08	0.313725	0.952	0.865	0.00174435	C1	SPIC
3.16791e-08	0.426315	1	1	0.00184965	C1	KSR2
3.16791e-08	0.260339	1	1	0.00184965	C1	IGFLR1
3.23687e-08	0.297117	1	0.978	0.00188991	C1	INSL3
3.37947e-08	0.627769	1	1	0.00197317	C1	KIAA1045
3.41276e-08	0.447654	0.984	0.944	0.00199261	C1	SIGLEC14
3.45298e-08	0.314205	1	1	0.00201609	C1	GSDMB
3.60126e-08	0.52553	1	0.933	0.00210267	C1	KLK1
3.6047e-08	0.3482	1	1	0.00210468	C1	ADAM28
3.6047e-08	0.322266	1	1	0.00210468	C1	CTB-133G6.1
3.68296e-08	0.351703	1	1	0.00215037	C1	NCF4
3.76277e-08	0.289751	1	0.978	0.00219697	C1	HTRA4
3.76287e-08	0.397677	1	1	0.00219703	C1	FGL2
3.76287e-08	0.368356	1	1	0.00219703	C1	IL2RA
3.76287e-08	0.367991	1	1	0.00219703	C1	ABCA7
3.76287e-08	0.283957	1	1	0.00219703	C1	STAT5A
3.92404e-08	0.587865	1	0.933	0.00229113	C1	TIMD4
3.92777e-08	0.359238	1	1	0.0022933	C1	CD1D
4.09966e-08	0.468746	1	1	0.00239367	C1	ACTN2
4.09966e-08	0.285128	1	1	0.00239367	C1	HVCN1
4.18832e-08	0.404558	1	1	0.00244543	C1	SMTNL1
4.23323e-08	0.436609	0.984	0.989	0.00247165	C1	SIGLEC12
4.27883e-08	0.728355	1	1	0.00249828	C1	GCGR
4.27883e-08	0.313436	1	1	0.00249828	C1	NFAM1
4.46559e-08	0.549192	1	1	0.00260733	C1	PTGDS
4.46559e-08	0.416803	1	1	0.00260733	C1	GNG8
4.56191e-08	0.357809	1	1	0.00266356	C1	KIF17
4.56191e-08	0.343415	1	1	0.00266356	C1	DHX58
4.66024e-08	0.333177	1	1	0.00272098	C1	CNTNAP2
5.29483e-08	0.278722	1	1	0.00309149	C1	LPAR5
5.64277e-08	0.330866	1	1	0.00329465	C1	SLFNL1
5.7636e-08	0.361239	1	1	0.00336519	C1	LAMC2
6.01283e-08	0.330487	1	1	0.00351071	C1	TNFRSF14
6.01283e-08	0.315948	1	1	0.00351071	C1	CLEC7A
6.40634e-08	0.471615	1	0.989	0.00374047	C1	MAL
6.70416e-08	0.414974	0.968	0.843	0.00391436	C1	KISS1
6.97003e-08	0.418578	1	1	0.00406959	C1	ITGAD
7.42016e-08	0.484419	1	0.944	0.00433241	C1	RP11-683L23.1
8.07412e-08	0.495838	1	1	0.00471424	C1	PROKR1
8.07412e-08	0.253369	1	1	0.00471424	C1	GPR64
8.18649e-08	0.503229	0.984	0.831	0.00477984	C1	C22orf42
8.25971e-08	0.258528	0.855	0.438	0.0048226	C1	NBPF4
8.59752e-08	0.2725	1	1	0.00501984	C1	IGSF22
8.77918e-08	0.332202	1	1	0.0051259	C1	KLHDC7B
9.34673e-08	0.330821	1	1	0.00545728	C1	STXBP2
9.67676e-08	0.664709	0.984	0.831	0.00564997	C1	PPP1R17
9.94948e-08	0.252915	1	0.978	0.0058092	C1	ERP27
1.05903e-07	0.565259	1	1	0.00618337	C1	C1QL3
1.05903e-07	0.318947	1	1	0.00618337	C1	FAM71F2
1.08126e-07	0.479313	1	1	0.00631314	C1	TUBA4A
1.08126e-07	0.405048	1	1	0.00631314	C1	RARRES3
1.08126e-07	0.286226	1	1	0.00631314	C1	SP110
1.10393e-07	0.358724	1	1	0.00644555	C1	MFNG
1.12707e-07	0.466895	1	1	0.00658064	C1	HPCA
1.15068e-07	0.400148	1	1	0.00671847	C1	SPOCK2
1.15068e-07	0.285417	1	1	0.00671847	C1	KCNC4
1.17476e-07	0.324791	1	1	0.00685909	C1	SRMS
1.1993e-07	0.264802	1	0.978	0.00700238	C1	VIPR2
1.19934e-07	0.411107	1	1	0.00700256	C1	FGF17
1.2244e-07	0.290853	1	1	0.00714893	C1	TRIM74
1.24998e-07	0.349243	1	1	0.00729826	C1	SLFN5
1.30269e-07	0.370238	1	1	0.00760602	C1	SGK2
1.30269e-07	0.260736	1	1	0.00760602	C1	ETV7
1.35755e-07	0.41608	1	1	0.00792632	C1	LSP1
1.41464e-07	0.358021	1	1	0.00825965	C1	TRIM22
1.41464e-07	0.301657	1	1	0.00825965	C1	BTN2A2
1.50465e-07	0.291705	1	1	0.00878519	C1	CD300A
1.53587e-07	0.551384	1	1	0.00896746	C1	KLHL14
1.53587e-07	0.494929	1	1	0.00896746	C1	RAB37
1.53587e-07	0.483156	1	1	0.00896746	C1	SLC7A4
1.56771e-07	0.294814	1	1	0.00915337	C1	FAM182B
1.63332e-07	0.259667	1	1	0.00953645	C1	CHRNE
1.66711e-07	0.271971	1	1	0.00973376	C1	CCR10
1.73674e-07	0.307979	1	1	0.0101403	C1	CISH
1.7726e-07	0.356179	1	1	0.0103497	C1	BLNK
1.84647e-07	0.344395	1	1	0.010781	C1	CAPG
1.84647e-07	0.27857	1	1	0.010781	C1	RNF125
1.92332e-07	0.353449	1	1	0.0112297	C1	APOL6
1.92332e-07	0.32134	1	1	0.0112297	C1	SIGIRR
1.9629e-07	0.321293	1	1	0.0114608	C1	TMEM71
2.00326e-07	0.347126	1	1	0.0116964	C1	NTN5
2.26281e-07	0.301064	1	1	0.0132119	C1	IL15
2.35634e-07	0.646938	1	1	0.0137579	C1	SEMA3D
2.40449e-07	0.352418	1	1	0.0140391	C1	PSMB9
2.45359e-07	0.325508	1	0.989	0.0143258	C1	KLHL33
2.50246e-07	0.261737	1	0.944	0.0146111	C1	H1FNT
2.50366e-07	0.275734	1	1	0.0146181	C1	SLC6A13
2.50366e-07	0.253497	1	1	0.0146181	C1	CD83
2.71399e-07	0.274665	1	1	0.0158462	C1	DPP4
2.71399e-07	0.263064	1	1	0.0158462	C1	FAT2
2.76918e-07	0.266966	1	1	0.0161684	C1	ENPP2
2.76918e-07	0.256199	1	1	0.0161684	C1	PITPNM1
2.88284e-07	0.482994	1	1	0.016832	C1	CDH4
2.88284e-07	0.401616	1	1	0.016832	C1	SNX10
2.94134e-07	0.290355	1	1	0.0171736	C1	SPI1
3.00099e-07	0.289783	1	1	0.0175219	C1	SLC45A3
3.18695e-07	0.338212	1	0.978	0.0186076	C1	PRSS45
3.18703e-07	0.295409	1	1	0.0186081	C1	MYCBPAP
3.18703e-07	0.295158	1	1	0.0186081	C1	C7orf61
3.31718e-07	0.301688	1	1	0.019368	C1	CD86
3.38417e-07	0.27263	1	1	0.0197592	C1	AGBL4
3.52209e-07	0.313133	1	1	0.0205644	C1	GPR98
3.66543e-07	0.39787	1	1	0.0214013	C1	BCL2A1
3.66543e-07	0.327375	1	1	0.0214013	C1	ACSL5
3.73919e-07	0.335526	1	1	0.021832	C1	ERAS
3.73919e-07	0.318493	1	1	0.021832	C1	GIMAP6
3.73919e-07	0.261765	1	1	0.021832	C1	TMEM150B
3.81439e-07	0.43291	1	1	0.0222711	C1	KNDC1
3.81439e-07	0.311753	1	1	0.0222711	C1	CARD14
3.81439e-07	0.304615	1	1	0.0222711	C1	STXBP5L
3.96918e-07	0.251648	1	1	0.0231748	C1	FAM222A
4.29714e-07	0.356447	1	1	0.0250897	C1	CFAP46
4.29714e-07	0.319027	1	1	0.0250897	C1	PTAFR
4.29714e-07	0.317711	1	0.989	0.0250897	C1	OCM
4.38303e-07	0.380184	1	0.978	0.0255912	C1	GAPT
4.38313e-07	0.334012	1	0.989	0.0255918	C1	ALOX15B
4.47078e-07	0.323684	1	1	0.0261036	C1	LHFPL5
4.47078e-07	0.312918	1	1	0.0261036	C1	TNFAIP8
4.56012e-07	0.475322	1	1	0.0266252	C1	KRT19
4.56012e-07	0.312324	1	1	0.0266252	C1	KCNA3
4.65118e-07	0.332755	1	1	0.0271569	C1	PLCH2
4.74399e-07	0.282932	1	1	0.0276988	C1	SFN
4.74399e-07	0.273753	1	1	0.0276988	C1	FBXO6
4.74399e-07	0.258595	1	1	0.0276988	C1	MPP7
4.74399e-07	0.251324	1	1	0.0276988	C1	PANX2
4.83859e-07	0.526426	1	0.989	0.0282511	C1	KIF25
4.83859e-07	0.436256	1	1	0.0282511	C1	PACSIN1
4.83859e-07	0.274448	1	1	0.0282511	C1	PLD4
4.88266e-07	0.269893	0.984	0.944	0.0285084	C1	TMEM211
4.99909e-07	0.285036	1	0.742	0.0291882	C1	SERPINA9
5.03327e-07	0.32376	1	1	0.0293878	C1	GIMAP8
5.03327e-07	0.250763	1	1	0.0293878	C1	RGS18
5.2355e-07	0.262161	1	1	0.0305685	C1	NABP1
5.44122e-07	0.315663	1	0.933	0.0317697	C1	VWA5B1
5.51926e-07	0.338372	0.935	0.831	0.0322253	C1	THEG
5.55359e-07	0.421194	1	1	0.0324258	C1	ATHL1
5.66242e-07	0.354842	0.968	0.978	0.0330612	C1	SEPT12
5.6637e-07	0.297936	1	1	0.0330687	C1	CECR1
5.6637e-07	0.267439	1	1	0.0330687	C1	ABI3
5.6637e-07	0.251757	1	1	0.0330687	C1	TDRD6
5.77592e-07	0.382527	1	1	0.0337239	C1	INSM2
5.77592e-07	0.307098	1	1	0.0337239	C1	UNC93B1
5.89028e-07	0.283679	1	1	0.0343916	C1	FRMPD3
5.89028e-07	0.26982	1	1	0.0343916	C1	CYB561
6.00682e-07	0.373699	1	1	0.035072	C1	CLUL1
6.00682e-07	0.357454	1	1	0.035072	C1	EPSTI1
6.00682e-07	0.297769	1	1	0.035072	C1	CLIC2
6.00682e-07	0.269712	1	1	0.035072	C1	PARP10
6.2466e-07	0.284446	1	1	0.036472	C1	SLC6A12
6.2466e-07	0.283184	1	1	0.036472	C1	CYSLTR2
6.36993e-07	0.529852	1	1	0.0371921	C1	BLK
6.62069e-07	0.423137	1	0.944	0.0386562	C1	PNMA5
6.62365e-07	0.269768	1	1	0.0386735	C1	CDHR2
6.75414e-07	0.301107	1	1	0.0394354	C1	MILR1
7.02259e-07	0.521494	1	1	0.0410028	C1	NTN1
7.16064e-07	0.260386	1	1	0.0418088	C1	NUAK2
7.16064e-07	0.256361	1	1	0.0418088	C1	ADAM8
7.26574e-07	0.327721	0.952	0.91	0.0424225	C1	PRSS56
7.30131e-07	0.328092	1	1	0.0426301	C1	LRRC46
7.73945e-07	0.365457	1	1	0.0451883	C1	LRRC56
7.73945e-07	0.357477	1	1	0.0451883	C1	KIF21B
7.81951e-07	0.264873	0.871	0.708	0.0456558	C1	MRGPRD
8.20287e-07	0.42638	1	1	0.0478941	C1	CD209
8.52635e-07	0.411011	1	0.978	0.0497828	C1	UBL4B
8.69295e-07	0.385845	1	1	0.0507555	C1	HAPLN2
8.86249e-07	0.319072	1	1	0.0517454	C1	TAP1
9.03521e-07	0.285057	1	0.989	0.0527539	C1	TAC4
9.21117e-07	0.282912	1	1	0.0537813	C1	LGALS9
9.38838e-07	0.405874	1	0.955	0.054816	C1	PNOC
9.39043e-07	0.386187	1	1	0.0548279	C1	ECEL1
9.39043e-07	0.352028	1	1	0.0548279	C1	ALOX5
9.46425e-07	0.281283	0.968	0.697	0.0552589	C1	FABP12
9.56576e-07	0.36625	1	0.933	0.0558516	C1	AIM1L
9.57304e-07	0.307508	1	1	0.0558941	C1	CARD16
1.03383e-06	0.3371	1	1	0.060362	C1	ALS2CL
1.03383e-06	0.279939	1	1	0.060362	C1	ARMC12
1.05386e-06	0.359097	1	1	0.0615316	C1	KCNH6
1.05386e-06	0.353917	1	0.989	0.0615316	C1	GOLT1A
1.05386e-06	0.318558	1	1	0.0615316	C1	PARP14
1.05386e-06	0.252786	1	1	0.0615316	C1	MYADML2
1.07426e-06	0.310417	1	1	0.062723	C1	TSPAN33
1.09505e-06	0.336408	1	1	0.0639366	C1	RSAD2
1.11435e-06	0.635314	0.968	0.82	0.0650634	C1	CLEC4G
1.11622e-06	0.290763	1	1	0.0651727	C1	CSF1R
1.13778e-06	0.324717	1	1	0.0664318	C1	STX16-NPEPL1
1.15975e-06	0.273744	1	1	0.0677143	C1	MFSD4
1.18212e-06	0.348917	1	1	0.0690207	C1	SP140L
1.20491e-06	0.405492	1	1	0.0703512	C1	CASZ1
1.20491e-06	0.357717	1	1	0.0703512	C1	PAPLN
1.21429e-06	0.387776	0.984	0.921	0.0708985	C1	TNFSF11
1.22812e-06	0.453045	1	1	0.0717064	C1	NXPH4
1.22812e-06	0.280035	1	1	0.0717064	C1	SEL1L3
1.22812e-06	0.270136	1	1	0.0717064	C1	SLC7A7
1.25176e-06	0.326526	1	0.989	0.0730867	C1	SH2D7
1.27584e-06	0.537346	1	0.989	0.0744926	C1	CDH7
1.27584e-06	0.487103	1	1	0.0744926	C1	BAIAP3
1.27584e-06	0.321195	1	1	0.0744926	C1	ACP5
1.27584e-06	0.270858	1	1	0.0744926	C1	VAV3
1.35078e-06	0.381967	0.984	1	0.0788679	C1	CSTA
1.42994e-06	0.448258	1	1	0.0834899	C1	TCEAL6
1.42994e-06	0.307683	1	1	0.0834899	C1	CEBPA
1.4573e-06	0.278967	1	1	0.0850876	C1	P2RY6
1.48517e-06	0.346893	1	1	0.0867147	C1	PDZD7
1.48517e-06	0.258976	1	1	0.0867147	C1	PDCD1LG2
1.57188e-06	0.406284	1	1	0.0917775	C1	TG
1.57188e-06	0.326802	1	1	0.0917775	C1	GPD1
1.60185e-06	0.323384	1	1	0.0935274	C1	KCNJ9
1.66345e-06	0.279725	1	1	0.0971238	C1	KCNB2
1.69509e-06	0.366723	1	1	0.0989715	C1	MYH7
1.76013e-06	0.496843	1	1	0.102769	C1	ERICH3
1.79354e-06	0.307805	1	1	0.10472	C1	DNAAF1
1.79354e-06	0.301898	1	1	0.10472	C1	RCSD1
1.79354e-06	0.287973	1	1	0.10472	C1	CPVL
1.82756e-06	0.287496	1	1	0.106706	C1	ITGA3
2.00717e-06	0.290369	1	1	0.117193	C1	MAN1C1
2.04508e-06	0.349758	1	1	0.119406	C1	SIGLEC1
2.04508e-06	0.254109	1	1	0.119406	C1	RP11-793H13.10
2.04508e-06	0.250274	1	1	0.119406	C1	SNPH
2.12295e-06	0.420362	1	1	0.123953	C1	ASIC2
2.20368e-06	0.451458	1	1	0.128666	C1	SOWAHA
2.20368e-06	0.427548	1	1	0.128666	C1	NMNAT3
2.20368e-06	0.266074	1	0.989	0.128666	C1	ART4
2.23967e-06	0.705117	0.968	0.921	0.130768	C1	CD5L
2.33031e-06	0.458823	1	1	0.13606	C1	CACNA1G
2.38845e-06	0.326384	0.952	0.798	0.139454	C1	KCNC2
2.51006e-06	0.297871	1	1	0.146555	C1	NFATC1
2.55704e-06	0.290365	1	1	0.149298	C1	C3AR1
2.55704e-06	0.264678	1	1	0.149298	C1	NFKB2
2.60485e-06	0.258547	1	1	0.15209	C1	GMFG
2.65353e-06	0.384268	1	1	0.154932	C1	PTPRH
2.79815e-06	0.343511	0.984	0.91	0.163376	C1	AC055866.1
2.85711e-06	0.301993	1	1	0.166818	C1	BTN3A2
2.9103e-06	0.275549	1	1	0.169924	C1	AVPR2
3.05134e-06	0.776269	0.935	0.82	0.178159	C1	MAGEA10
3.07563e-06	0.286603	1	1	0.179577	C1	CASP8
3.1915e-06	0.270074	0.984	0.854	0.186342	C1	CRYM
3.37138e-06	0.368885	1	1	0.196845	C1	TTC39A
3.43372e-06	0.412578	1	1	0.200485	C1	CYP3A5
3.49334e-06	0.342556	1	0.921	0.203965	C1	ANKRD22
3.62744e-06	0.29848	1	1	0.211795	C1	AMOT
3.69431e-06	0.293152	1	1	0.215699	C1	CES4A
3.76235e-06	0.484919	1	0.989	0.219673	C1	CCL18
3.76235e-06	0.396495	1	1	0.219673	C1	GRIK1
3.90208e-06	0.251416	1	1	0.227831	C1	LRRC43
4.04676e-06	0.300396	1	1	0.236278	C1	KATNAL2
4.04676e-06	0.296832	1	1	0.236278	C1	GSDMD
4.04676e-06	0.261608	1	1	0.236278	C1	C2CD4C
4.43132e-06	0.456211	1	1	0.258732	C1	DYNC1I1
4.67861e-06	0.374491	1	0.989	0.27317	C1	MAGEE2
4.67861e-06	0.275654	1	1	0.27317	C1	PIK3AP1
4.93908e-06	0.3273	1	1	0.288378	C1	MX2
4.93908e-06	0.281026	1	0.989	0.288378	C1	DRICH1
5.12039e-06	0.347859	1	1	0.298964	C1	LDLRAP1
5.16573e-06	0.474185	0.984	0.966	0.301611	C1	SYNDIG1L
5.20161e-06	0.283209	1	0.899	0.303706	C1	AC019206.1
5.21243e-06	0.411653	1	0.955	0.304338	C1	GPRIN2
5.21342e-06	0.25814	1	1	0.304396	C1	MYO7B
5.30806e-06	0.376013	1	1	0.309922	C1	GABRQ
5.30806e-06	0.253831	1	1	0.309922	C1	BTN3A1
5.64872e-06	0.312784	0.984	0.944	0.329812	C1	PRSS46
5.80604e-06	0.268225	1	0.966	0.338997	C1	OVOL3
5.80604e-06	0.259215	1	0.966	0.338997	C1	BHLHA15
5.80648e-06	0.420151	1	1	0.339023	C1	GPR123
5.9114e-06	0.281378	1	1	0.345149	C1	TMEM191B
6.01813e-06	0.270038	1	1	0.351381	C1	RNASE6
6.12671e-06	0.283084	1	1	0.35772	C1	CBFA2T3
6.23716e-06	0.366965	1	1	0.364169	C1	LEF1
6.23731e-06	0.468833	0.871	0.573	0.364178	C1	MAGEA9
6.34951e-06	0.29926	1	1	0.370729	C1	MUC1
6.43749e-06	0.670985	1	0.876	0.375866	C1	PAGE5
6.4638e-06	0.355038	1	1	0.377402	C1	NAV3
6.69831e-06	0.276827	1	1	0.391094	C1	LRRC25
6.69831e-06	0.261385	1	1	0.391094	C1	GBP3
6.8186e-06	0.272457	1	1	0.398117	C1	LILRB2
6.94095e-06	0.298077	1	1	0.405261	C1	RAB26
7.0654e-06	0.270937	1	1	0.412527	C1	CRIP1
7.32073e-06	0.354952	1	1	0.427435	C1	ADRA2A
7.32073e-06	0.324073	1	1	0.427435	C1	KIAA0226L
7.32073e-06	0.278756	1	1	0.427435	C1	PAG1
7.58486e-06	0.250124	1	1	0.442857	C1	PANO1
7.72033e-06	0.342308	1	1	0.450767	C1	DUOXA1
7.72457e-06	0.621116	0.984	0.854	0.451015	C1	BTBD17
7.99822e-06	0.485409	1	0.989	0.466992	C1	SEMA3E
8.2004e-06	0.418648	0.984	0.921	0.478797	C1	YBX2
8.43307e-06	0.3793	1	1	0.492382	C1	LTF
8.43307e-06	0.293521	1	1	0.492382	C1	MUC20
8.73479e-06	0.337378	1	0.966	0.509998	C1	IGFL4
8.73542e-06	0.263061	1	1	0.510035	C1	PGPEP1
9.04812e-06	0.255017	1	1	0.528292	C1	UBA7
9.70589e-06	0.313833	1	1	0.566698	C1	ERAP2
1.02289e-05	0.415681	1	1	0.597237	C1	TEX14
1.05925e-05	0.274494	1	1	0.618463	C1	CATSPERG
1.07788e-05	0.262577	1	1	0.629344	C1	KCNC3
1.07788e-05	0.259667	1	1	0.629344	C1	IFI35
1.10619e-05	0.364098	0.71	0.371	0.645869	C1	MAGEA9B
1.1161e-05	0.321621	1	1	0.651657	C1	SYT13
1.13569e-05	0.251717	1	1	0.663095	C1	MICB
1.15185e-05	0.456739	0.952	0.854	0.672531	C1	MAGEA8
1.15561e-05	0.292485	1	1	0.674725	C1	CCR1
1.17586e-05	0.293144	1	1	0.686548	C1	CD97
1.17586e-05	0.280321	1	1	0.686548	C1	FXYD5
1.17586e-05	0.274481	1	1	0.686548	C1	B3GNT8
1.21738e-05	0.30222	1	1	0.710792	C1	OAS2
1.25846e-05	0.42159	1	0.91	0.734776	C1	FGF19
1.2603e-05	0.294354	1	1	0.735852	C1	TFAP2E
1.28152e-05	0.366863	1	0.933	0.74824	C1	TKTL1
1.2823e-05	0.342502	1	1	0.748696	C1	KIAA0513
1.2823e-05	0.280119	1	1	0.748696	C1	IFIH1
1.30421e-05	0.392561	0.984	0.955	0.761489	C1	HTR1B
1.30466e-05	0.28817	1	1	0.761753	C1	CLSTN2
1.30466e-05	0.276219	1	1	0.761753	C1	CFAP43
1.30466e-05	0.270075	1	1	0.761753	C1	CFAP70
1.3141e-05	0.294163	0.871	0.629	0.767261	C1	BSX
1.3274e-05	0.28935	1	1	0.775028	C1	SSTR2
1.37401e-05	0.388552	1	1	0.802242	C1	LMNTD2
1.37401e-05	0.275617	1	1	0.802242	C1	CNTN1
1.39789e-05	0.271619	1	1	0.816188	C1	PIPOX
1.42218e-05	0.260102	1	1	0.830366	C1	SLC9A9
1.42669e-05	0.275266	0.952	0.843	0.832999	C1	FGF16
1.47195e-05	0.293519	1	1	0.859429	C1	CLEC18B
1.47195e-05	0.257595	1	1	0.859429	C1	PRKCH
1.49746e-05	0.27642	1	1	0.874322	C1	TLR4
1.57653e-05	0.341569	1	1	0.920491	C1	DHDH
1.57653e-05	0.255811	1	0.989	0.920491	C1	FAM151A
1.60376e-05	0.299058	1	1	0.93639	C1	CMPK2
1.60376e-05	0.250558	1	1	0.93639	C1	IL32
1.63144e-05	0.389257	1	1	0.952551	C1	RTP5
1.63144e-05	0.252887	1	1	0.952551	C1	STK17B
1.68806e-05	0.265928	1	0.966	0.985608	C1	CLEC4E
1.71712e-05	0.439877	0.984	0.978	1	C1	LGSN
1.74678e-05	0.309334	1	1	1	C1	SAMD9L
1.74678e-05	0.300988	1	1	1	C1	CRB2
1.74678e-05	0.300315	1	1	1	C1	C11orf42
1.77681e-05	0.282103	1	1	1	C1	OASL
1.80732e-05	0.511671	1	1	1	C1	GRIN3A
1.80732e-05	0.310523	1	1	1	C1	GPR183
1.80732e-05	0.29698	1	1	1	C1	PCP4L1
1.93446e-05	0.370797	1	1	1	C1	TNF
1.93446e-05	0.262116	1	1	1	C1	RTP4
2.06995e-05	0.340707	0.984	0.978	1	C1	KRT222
2.10534e-05	0.27257	1	0.978	1	C1	NPY1R
2.14124e-05	0.297518	1	1	1	C1	TEPP
2.14124e-05	0.270631	1	1	1	C1	BTN3A3
2.17769e-05	0.368453	1	1	1	C1	BMPER
2.21473e-05	0.337156	1	0.989	1	C1	IL33
2.32948e-05	0.348684	1	1	1	C1	PRSS50
2.36897e-05	0.256617	1	1	1	C1	ADAM11
2.40909e-05	0.319445	1	1	1	C1	GBP1
2.49129e-05	0.265874	1	1	1	C1	CD40
2.49129e-05	0.263331	1	1	1	C1	HIST3H2BB
2.55284e-05	0.58444	0.968	0.854	1	C1	UCN3
2.57612e-05	0.467197	1	0.978	1	C1	XCL1
2.57616e-05	0.404813	1	1	1	C1	PNMT
2.57616e-05	0.289036	1	1	1	C1	VCAM1
2.61961e-05	0.254148	1	1	1	C1	GRID2IP
2.66377e-05	0.259269	1	1	1	C1	SH2D2A
2.66377e-05	0.255524	1	1	1	C1	ZNF273
2.69294e-05	0.323083	0.871	0.708	1	C1	CFC1
2.75421e-05	0.301096	1	1	1	C1	HAPLN3
2.79961e-05	0.411709	0.984	0.955	1	C1	HS3ST4
2.80051e-05	0.270106	1	1	1	C1	LY86
2.89536e-05	0.26948	1	1	1	C1	AQP3
3.04336e-05	0.269579	1	1	1	C1	MS4A6A
3.09428e-05	0.320573	1	1	1	C1	BEX5
3.09428e-05	0.299178	1	1	1	C1	ADM2
3.09428e-05	0.279422	1	1	1	C1	FNDC5
3.09428e-05	0.257897	1	1	1	C1	FPR3
3.25192e-05	0.441554	1	1	1	C1	TMC2
3.36122e-05	0.353708	1	1	1	C1	LRRC10B
3.36122e-05	0.293334	1	1	1	C1	STRIP2
3.41717e-05	0.280384	1	1	1	C1	CD82
3.41717e-05	0.27778	1	1	1	C1	TNFAIP3
3.41717e-05	0.255396	1	1	1	C1	GBP2
3.53174e-05	0.258181	1	1	1	C1	TAS2R4
3.64995e-05	0.259715	1	1	1	C1	ROM1
3.71045e-05	0.274629	1	1	1	C1	CLEC2D
3.89773e-05	0.337293	1	1	1	C1	SLC7A8
3.89773e-05	0.259167	1	1	1	C1	PRR29
3.96188e-05	0.254923	0.968	0.989	1	C1	FAM92B
4.29953e-05	0.25814	1	1	1	C1	CCDC78
4.44198e-05	0.257522	1	1	1	C1	PLEKHD1
4.51487e-05	0.351387	1	1	1	C1	PNLDC1
4.51487e-05	0.333776	1	1	1	C1	TSTD1
4.51487e-05	0.258708	1	1	1	C1	RNF224
4.58302e-05	0.324499	0.968	0.933	1	C1	GNG13
4.66408e-05	0.283032	1	0.989	1	C1	SELP
4.66408e-05	0.254678	1	1	1	C1	B3GALT1
4.74042e-05	0.43278	1	1	1	C1	INSRR
4.81795e-05	0.303384	1	1	1	C1	PTGER4
4.81795e-05	0.264131	1	1	1	C1	SLCO2B1
5.05704e-05	0.365743	1	0.955	1	C1	ELFN2
5.0578e-05	0.305326	1	1	1	C1	SEMA3A
5.0578e-05	0.266418	1	1	1	C1	TDRD12
5.0578e-05	0.2621	1	1	1	C1	BIK
5.14024e-05	0.327478	1	1	1	C1	NXPH3
5.14024e-05	0.326299	1	1	1	C1	KCNIP4
5.14024e-05	0.264126	1	1	1	C1	LRRC66
5.21863e-05	0.554809	0.968	0.809	1	C1	CRH
5.22395e-05	0.350855	1	1	1	C1	GPR182
5.48289e-05	0.266723	1	1	1	C1	KCNN4
5.66214e-05	0.275806	1	0.978	1	C1	RASGEF1C
5.75397e-05	0.270427	1	1	1	C1	CCL4
5.94168e-05	0.327795	1	1	1	C1	HPCAL4
6.2338e-05	0.309038	1	0.966	1	C1	SPAG6
6.43667e-05	0.308098	1	1	1	C1	TNFRSF13C
6.43667e-05	0.295038	1	1	1	C1	OAS1
6.43667e-05	0.264256	1	1	1	C1	PROCA1
6.68132e-05	0.856056	0.79	0.742	1	C1	CLEC4M
6.8605e-05	0.269192	1	1	1	C1	NPIPB6
6.8605e-05	0.259094	1	1	1	C1	NIPAL3
7.08219e-05	0.296412	1	1	1	C1	CA8
7.08219e-05	0.251668	1	1	1	C1	PEG3
7.19556e-05	0.337864	1	1	1	C1	FAM189A2
7.31065e-05	0.324974	1	1	1	C1	WIPF3
7.78863e-05	0.264304	1	1	1	C1	ALOX5AP
7.79119e-05	0.609667	0.806	0.506	1	C1	TUBA3C
8.03856e-05	0.35141	1	1	1	C1	COL9A2
8.35162e-05	0.28764	0.984	0.921	1	C1	GPR45
8.56133e-05	0.274608	1	1	1	C1	SLC35F3
8.69684e-05	0.265316	1	0.978	1	C1	SLC4A10
8.97432e-05	0.261377	1	1	1	C1	RHCE
9.70474e-05	0.257272	1	1	1	C1	RAP1GAP
0.000101696	0.27255	1	1	1	C1	STPG1
0.000103291	0.330676	1	1	1	C1	ATP8A2
0.000103291	0.250108	1	1	1	C1	RSPH1
0.00010491	0.298974	1	1	1	C1	IL11
0.000106552	0.363845	1	0.978	1	C1	SLC22A3
0.000106553	0.448085	1	0.989	1	C1	MMP12
0.000106553	0.303695	1	1	1	C1	SORCS1
0.000107353	0.559083	0.919	0.719	1	C1	MAGEA11
0.00011163	0.256675	1	1	1	C1	TNFRSF4
0.000112738	0.398678	0.952	0.831	1	C1	C18orf42
0.000118163	0.282183	0.952	0.888	1	C1	RTP1
0.000118747	0.345832	1	0.966	1	C1	TRIM55
0.000118753	0.310753	1	1	1	C1	CACNA2D3
0.000118753	0.251432	1	1	1	C1	TMEM63A
0.0001206	0.255461	1	1	1	C1	CD163L1
0.000128262	0.31143	1	1	1	C1	DUSP2
0.000130247	0.26695	1	1	1	C1	STK26
0.000140618	0.397487	1	1	1	C1	CXorf57
0.000144981	0.384189	1	1	1	C1	ZFR2
0.00014947	0.348514	1	1	1	C1	NOTUM
0.000151764	0.297651	1	1	1	C1	ACHE
0.000158845	0.376304	1	1	1	C1	TBX1
0.00016105	0.467719	0.952	0.854	1	C1	HTR2C
0.000173949	0.286906	1	1	1	C1	MST1R
0.000173949	0.259244	1	1	1	C1	XK
0.000179278	0.42612	1	1	1	C1	FOXN4
0.000190397	0.250371	1	1	1	C1	STK33
0.000203131	0.299352	0.903	0.708	1	C1	KRT71
0.000205209	0.396583	1	1	1	C1	SLC18A2
0.000205209	0.319185	1	1	1	C1	MX1
0.000205209	0.283324	1	1	1	C1	XAF1
0.000217831	0.256493	1	1	1	C1	TNFSF10
0.000217831	0.25115	1	1	1	C1	USP18
0.000221099	0.264145	1	0.989	1	C1	SLC26A7
0.00024169	0.354697	1	1	1	C1	CCDC68
0.000245292	0.289004	1	1	1	C1	SNCG
0.000248684	0.274646	0.968	0.933	1	C1	GPRC5D
0.00026021	0.424937	1	0.989	1	C1	ALDH1A2
0.00026021	0.317576	1	1	1	C1	C17orf107
0.00026021	0.281338	1	1	1	C1	BTNL9
0.000275976	0.27888	1	1	1	C1	SHISA7
0.000280055	0.40168	1	0.989	1	C1	HLA-DQA2
0.000292633	0.355591	1	1	1	C1	C7
0.000310228	0.387156	1	1	1	C1	CPEB1
0.000333616	0.262217	1	1	1	C1	KIAA0319
0.000338488	0.288338	1	1	1	C1	P2RX5
0.000358646	0.327253	1	1	1	C1	C1QTNF2
0.000358646	0.279028	1	0.989	1	C1	MAP1LC3C
0.000374097	0.28011	0.919	0.708	1	C1	SLC30A8
0.000374496	0.328443	1	1	1	C1	IFI44L
0.000388197	0.322335	0.984	0.989	1	C1	PTPN20A
0.000390999	0.358965	1	1	1	C1	UNC5D
0.000396649	0.33297	1	1	1	C1	LDHAL6A
0.000402375	0.250875	1	1	1	C1	CYP46A1
0.000414061	0.253781	1	0.989	1	C1	AMHR2
0.000426062	0.296494	1	1	1	C1	AQP7
0.000432184	0.303125	1	1	1	C1	CYP4X1
0.000438388	0.255503	1	1	1	C1	HLA-DRB5
0.000451046	0.29075	1	1	1	C1	PACRG
0.000464045	0.309113	1	1	1	C1	RAB3B
0.000477392	0.294796	1	1	1	C1	PLA2G16
0.000549668	0.37728	1	1	1	C1	LGI3
0.000549668	0.275336	1	1	1	C1	ELFN1
0.000557431	0.255135	1	1	1	C1	ZBTB7C
0.000573263	0.276775	1	1	1	C1	PTGER1
0.000619596	0.716614	0.758	0.562	1	C1	CTAG2
0.000623309	0.26407	1	1	1	C1	TEKT2
0.000627589	0.430215	0.984	0.966	1	C1	RSPO4
0.000632035	0.265338	1	1	1	C1	SLCO2A1
0.000632035	0.264701	1	1	1	C1	PALM3
0.000648979	0.39161	1	0.899	1	C1	SLC5A12
0.000649828	0.337586	1	1	1	C1	MMP9
0.000649828	0.326979	1	1	1	C1	TMEM132C
0.00065887	0.30426	1	0.966	1	C1	ADH1B
0.000658899	0.393737	1	1	1	C1	EVPL
0.000727514	0.261164	0.484	0.236	1	C1	DCAF8L1
0.000735156	0.654868	0.968	0.933	1	C1	CALB2
0.000755342	0.287995	0.984	0.91	1	C1	CRYGC
0.000756276	0.349077	1	0.966	1	C1	PIWIL1
0.000818904	0.272783	0.984	0.775	1	C1	SBK2
0.000902926	0.251289	1	0.966	1	C1	SLC24A2
0.000966077	0.348112	1	1	1	C1	COL22A1
0.000989733	0.310727	0.694	0.449	1	C1	POTEH
0.00100588	0.300956	1	0.989	1	C1	RP11-35N6.1
0.00103805	0.27421	0.565	0.36	1	C1	OTX2
0.00104699	0.334461	1	0.944	1	C1	PLA2G4D
0.00109008	0.290137	1	1	1	C1	GRIN2D
0.00109008	0.264065	1	1	1	C1	PCSK1
0.00114965	0.255132	0.952	0.854	1	C1	ALX3
0.0011673	0.261638	0.839	0.685	1	C1	CDH9
0.00124302	0.270467	0.968	0.91	1	C1	KLHL1
0.0012616	0.341849	1	1	1	C1	STAB2
0.00127825	0.3681	1	0.955	1	C1	SLCO1A2
0.00127837	0.297162	1	1	1	C1	PRPH2
0.00129534	0.269584	1	1	1	C1	MDGA1
0.00136534	0.304439	1	1	1	C1	TBX20
0.00136534	0.265287	1	1	1	C1	RFPL2
0.00152995	0.317453	0.79	0.573	1	C1	NAA11
0.00159681	0.250845	1	1	1	C1	THEM5
0.00163743	0.459202	0.968	0.933	1	C1	NTS
0.00166006	0.317847	1	1	1	C1	MAGEL2
0.00168166	0.326677	1	1	1	C1	TENM1
0.00181639	0.269402	1	0.944	1	C1	C1QTNF9
0.00184019	0.287735	1	1	1	C1	PTGER3
0.00188759	0.324871	0.952	0.978	1	C1	SPINK9
0.00189988	0.259409	0.984	0.966	1	C1	CCL4L1
0.00196171	0.311772	1	1	1	C1	RGS9
0.00216921	0.510365	0.984	0.91	1	C1	PAGE2
0.00217154	0.279666	1	1	1	C1	DUSP9
0.00217154	0.274312	1	1	1	C1	RBM20
0.0022836	0.261921	1	0.944	1	C1	HIST1H2AI
0.00232446	0.329833	0.871	0.708	1	C1	GRP
0.0025568	0.260331	1	1	1	C1	KIAA1644
0.0026881	0.282203	0.806	0.674	1	C1	AC092384.1
0.0027459	0.605791	0.855	0.798	1	C1	LCN1
0.00280305	0.367319	0.855	0.764	1	C1	MAGEC1
0.00282397	0.347232	1	0.989	1	C1	CXCL14
0.0028591	0.273612	1	1	1	C1	EPHA8
0.00289463	0.362965	1	1	1	C1	WFDC2
0.0029669	0.274998	1	1	1	C1	C1orf111
0.00300364	0.32674	1	1	1	C1	LRRTM1
0.00304081	0.267623	1	1	1	C1	TULP1
0.00304081	0.265602	1	1	1	C1	HS3ST5
0.00307839	0.274699	1	1	1	C1	CNTD2
0.003233	0.360663	1	0.989	1	C1	ZNF812
0.003233	0.332785	1	1	1	C1	GUCA1A
0.00327247	0.423797	0.968	0.978	1	C1	MAL2
0.00339464	0.267795	1	1	1	C1	VSNL1
0.00345828	0.276342	0.855	0.809	1	C1	CFHR3
0.00352067	0.287521	1	1	1	C1	PKIB
0.00369533	0.333362	1	0.989	1	C1	TFF3
0.00374021	0.273102	1	1	1	C1	ADRB2
0.0038778	0.321114	1	0.978	1	C1	GTSF1
0.00387783	0.320177	1	1	1	C1	FUT1
0.00452892	0.260532	1	1	1	C1	SV2B
0.00474828	0.3382	1	0.978	1	C1	CARTPT
0.00486158	0.300011	1	0.989	1	C1	CRYBA2
0.00509548	0.305435	1	1	1	C1	CCBE1
0.0053395	0.274381	1	1	1	C1	PPL
0.00540213	0.252186	1	1	1	C1	GNAL
0.00665251	0.436184	0.726	0.618	1	C1	MAGEC2
0.00711864	0.267131	1	1	1	C1	IGSF21
0.00719956	0.485782	1	0.966	1	C1	C1QTNF9B
0.00753264	0.300406	1	1	1	C1	GPR179
0.00770421	0.279532	1	1	1	C1	CREG2
0.00798691	0.315754	0.871	0.798	1	C1	TAC1
0.00861564	0.260748	1	1	1	C1	TMEM255A
0.00890703	0.285564	0.984	0.978	1	C1	NOG
0.00910655	0.390362	1	1	1	C1	NGEF
0.00962228	0.258713	1	1	1	C1	PRAME
1.15157e-16	0.30804	1	1	6.72365e-12	C2	SPARC
1.4752e-16	0.576713	1	1	8.61327e-12	C2	RAB31
3.93888e-16	0.549588	1	1	2.2998e-11	C2	MSRB3
9.3573e-16	0.420418	1	1	5.46345e-11	C2	HTRA1
1.31865e-15	0.514726	1	1	7.6992e-11	C2	PLS3
1.91923e-15	0.468885	1	1	1.12058e-10	C2	MMP14
2.1253e-15	0.65174	1	1	1.2409e-10	C2	GPX8
2.51821e-15	0.46459	1	1	1.47031e-10	C2	FNDC3B
2.60497e-15	0.456928	1	1	1.52097e-10	C2	COL1A2
5.84245e-15	0.692779	1	1	3.41123e-10	C2	LTBP1
6.0411e-15	0.282719	1	1	3.52722e-10	C2	PLOD1
7.38046e-15	0.641196	1	1	4.30923e-10	C2	KDELR3
7.63048e-15	0.5269	1	1	4.45521e-10	C2	COL5A2
9.62974e-15	0.444384	1	1	5.62251e-10	C2	MYL9
1.02901e-14	0.351114	1	1	6.0081e-10	C2	CALD1
1.06369e-14	0.275973	1	1	6.21054e-10	C2	ANXA5
1.43218e-14	0.561925	1	1	8.36208e-10	C2	GNG12
1.6885e-14	0.664546	1	1	9.85866e-10	C2	CD109
2.26845e-14	0.688456	1	1	1.32448e-09	C2	COL12A1
3.04327e-14	0.556631	1	1	1.77687e-09	C2	PPIC
3.58071e-14	0.498337	1	1	2.09067e-09	C2	PRKG1
4.34984e-14	0.432957	1	1	2.53974e-09	C2	PTRF
4.64067e-14	0.841564	1	1	2.70955e-09	C2	GPC4
4.64067e-14	0.551193	1	1	2.70955e-09	C2	PXDC1
5.11311e-14	0.624458	1	1	2.98539e-09	C2	MYOF
5.63275e-14	0.35346	1	1	3.28879e-09	C2	RHOC
6.4071e-14	0.626364	1	1	3.74091e-09	C2	ECM2
7.28586e-14	0.518639	1	1	4.25399e-09	C2	COL5A1
7.76864e-14	0.565968	1	1	4.53588e-09	C2	CHSY3
8.28283e-14	0.630879	1	1	4.8361e-09	C2	COPZ2
8.28283e-14	0.570581	1	1	4.8361e-09	C2	OLFML1
9.41358e-14	0.336709	1	1	5.49631e-09	C2	VCL
9.71919e-14	0.477519	1	1	5.67474e-09	C2	S100A13
9.71919e-14	0.445459	1	1	5.67474e-09	C2	RCN3
1.03599e-13	0.388631	1	1	6.04886e-09	C2	RRBP1
1.06957e-13	0.577587	1	1	6.24491e-09	C2	TMEM47
1.13997e-13	0.631548	1	1	6.65592e-09	C2	CCDC8
1.13997e-13	0.555474	1	1	6.65592e-09	C2	THBS2
1.17685e-13	0.667873	1	1	6.87128e-09	C2	FAM46A
1.17685e-13	0.508948	1	1	6.87128e-09	C2	OLFML2B
1.17685e-13	0.386549	1	1	6.87128e-09	C2	FSTL1
1.21491e-13	0.627343	1	1	7.09348e-09	C2	CHST3
1.29469e-13	0.547429	1	1	7.55928e-09	C2	MRC2
1.51734e-13	0.755287	1	1	8.85932e-09	C2	KCNE4
1.51734e-13	0.345689	1	1	8.85932e-09	C2	C5AR2
1.61659e-13	0.326266	1	1	9.43876e-09	C2	LGALS1
1.66857e-13	0.358477	1	1	9.74229e-09	C2	CERCAM
1.83458e-13	0.435481	1	1	1.07116e-08	C2	BST1
3.03442e-13	0.454699	1	1	1.77171e-08	C2	LAMB2
3.333e-13	0.692669	1	1	1.94604e-08	C2	WLS
3.66039e-13	0.683406	1	1	2.13719e-08	C2	LATS2
3.77638e-13	0.364633	1	1	2.20491e-08	C2	LMNA
3.89598e-13	0.423773	1	1	2.27474e-08	C2	LRRC32
4.01929e-13	0.547944	1	1	2.34675e-08	C2	DOCK1
4.01929e-13	0.413888	1	1	2.34675e-08	C2	FN1
4.14644e-13	0.381111	1	1	2.42098e-08	C2	TBC1D8B
4.27754e-13	0.61124	1	1	2.49753e-08	C2	YAP1
4.27754e-13	0.519819	1	1	2.49753e-08	C2	CDC42EP1
4.55206e-13	0.335476	1	1	2.65781e-08	C2	NFIC
4.69573e-13	0.50431	1	1	2.7417e-08	C2	CPQ
4.84385e-13	0.516296	1	1	2.82818e-08	C2	LMCD1
5.15399e-13	0.56224	1	1	3.00926e-08	C2	PLXDC2
5.31629e-13	0.354727	1	1	3.10402e-08	C2	MMP2
5.48361e-13	0.576415	1	1	3.20171e-08	C2	EFHD1
5.48361e-13	0.567912	1	1	3.20171e-08	C2	PRKCDBP
5.48361e-13	0.395511	1	1	3.20171e-08	C2	COL3A1
5.8339e-13	0.393011	1	1	3.40624e-08	C2	TAGLN
6.01719e-13	0.537494	1	1	3.51325e-08	C2	FAM114A1
6.20613e-13	0.462032	1	1	3.62357e-08	C2	COL6A3
6.60165e-13	0.723121	1	1	3.8545e-08	C2	CREB3L1
6.80858e-13	0.597835	1	1	3.97533e-08	C2	PLAC9
6.80858e-13	0.574374	1	1	3.97533e-08	C2	PRSS23
7.24174e-13	0.583262	1	1	4.22823e-08	C2	SGMS2
7.46834e-13	0.530807	1	1	4.36054e-08	C2	CTGF
8.44647e-13	0.360253	1	1	4.93164e-08	C2	SERPINH1
9.26154e-13	0.255535	1	1	5.40754e-08	C2	CMTM3
9.55002e-13	0.720174	1	1	5.57597e-08	C2	HEPH
9.55002e-13	0.626851	1	1	5.57597e-08	C2	CYBRD1
9.55002e-13	0.296711	1	1	5.57597e-08	C2	TAX1BP3
9.84731e-13	0.521767	1	1	5.74955e-08	C2	COL15A1
1.07947e-12	0.490813	1	1	6.30273e-08	C2	TMBIM1
1.21983e-12	0.600211	1	1	7.12221e-08	C2	KLF9
1.25763e-12	0.541415	1	1	7.3429e-08	C2	FBN1
1.25763e-12	0.440182	1	1	7.3429e-08	C2	NID1
1.37805e-12	0.631424	1	1	8.046e-08	C2	TMEM30B
1.37805e-12	0.627066	1	1	8.046e-08	C2	MDFI
1.42065e-12	0.405004	1	1	8.29473e-08	C2	COL1A1
1.60435e-12	0.271659	1	1	9.36733e-08	C2	THY1
1.81131e-12	0.531017	1	1	1.05757e-07	C2	SNAI2
1.86701e-12	0.257327	1	1	1.09009e-07	C2	SIL1
1.9835e-12	0.410488	1	1	1.1581e-07	C2	SPATS2L
1.9835e-12	0.403392	1	1	1.1581e-07	C2	ANTXR1
1.9835e-12	0.313173	1	1	1.1581e-07	C2	IGFBP4
1.9835e-12	0.26384	1	1	1.1581e-07	C2	FAM129B
2.10711e-12	0.539489	1	1	1.23028e-07	C2	SYDE1
2.23826e-12	0.613793	1	1	1.30686e-07	C2	PYGL
2.30681e-12	0.445653	1	1	1.34688e-07	C2	UBTD1
2.37742e-12	0.463379	1	1	1.3881e-07	C2	TNS1
2.45014e-12	0.525828	1	1	1.43057e-07	C2	KANK2
2.7635e-12	0.456811	1	1	1.61352e-07	C2	EPS8
2.84779e-12	0.591768	1	1	1.66274e-07	C2	SPON2
2.84779e-12	0.578445	1	1	1.66274e-07	C2	P3H2
3.21087e-12	0.533093	1	1	1.87473e-07	C2	TGFB3
3.40907e-12	0.296016	1	1	1.99045e-07	C2	MCAM
3.61924e-12	0.656738	1	1	2.11317e-07	C2	EMP1
3.61924e-12	0.46725	1	1	2.11317e-07	C2	FOXL1
3.84211e-12	0.581516	1	1	2.24329e-07	C2	ANXA1
4.07841e-12	0.475908	1	1	2.38126e-07	C2	S100A16
4.20185e-12	0.658494	1	1	2.45334e-07	C2	FAP
4.20185e-12	0.39642	1	1	2.45334e-07	C2	RAB13
4.20185e-12	0.291872	1	1	2.45334e-07	C2	BTD
4.32895e-12	0.552467	1	1	2.52754e-07	C2	EVA1A
4.32895e-12	0.50175	1	1	2.52754e-07	C2	SYTL2
4.32895e-12	0.276833	1	1	2.52754e-07	C2	HEXB
4.59456e-12	0.474489	1	1	2.68262e-07	C2	COL16A1
4.59456e-12	0.362535	1	1	2.68262e-07	C2	KIF1C
4.73328e-12	0.523112	1	1	2.76362e-07	C2	SLC2A10
4.73328e-12	0.364722	1	1	2.76362e-07	C2	LAMC1
4.87612e-12	0.554761	1	1	2.84702e-07	C2	AXL
4.87612e-12	0.538139	1	1	2.84702e-07	C2	PDGFC
5.02317e-12	0.548096	1	1	2.93288e-07	C2	NUPR1
5.02317e-12	0.434678	1	1	2.93288e-07	C2	TRAM2
5.17457e-12	0.743896	1	1	3.02128e-07	C2	PODN
5.17457e-12	0.326586	1	1	3.02128e-07	C2	PDGFRB
5.17457e-12	0.306907	1	1	3.02128e-07	C2	BGN
5.49091e-12	0.530249	1	1	3.20598e-07	C2	CAV2
5.65611e-12	0.547064	1	1	3.30243e-07	C2	ARID5B
5.65611e-12	0.364694	1	1	3.30243e-07	C2	JAG1
5.82618e-12	0.37664	1	1	3.40173e-07	C2	RAB32
6.00126e-12	0.62745	1	1	3.50396e-07	C2	WWTR1
6.00126e-12	0.447319	1	1	3.50396e-07	C2	CHST7
6.18149e-12	0.79097	1	1	3.60919e-07	C2	CRISPLD2
6.18149e-12	0.420025	1	1	3.60919e-07	C2	LUZP1
6.55802e-12	0.622518	1	1	3.82903e-07	C2	CDC42EP5
6.55802e-12	0.301633	1	1	3.82903e-07	C2	COL6A2
6.55802e-12	0.294018	1	1	3.82903e-07	C2	COL4A2
6.75462e-12	0.430269	1	1	3.94382e-07	C2	UACA
6.75462e-12	0.32204	1	1	3.94382e-07	C2	OSTF1
6.95699e-12	0.808686	1	1	4.06198e-07	C2	FIBIN
6.95699e-12	0.606437	1	1	4.06198e-07	C2	RUNX1
6.95699e-12	0.400839	1	1	4.06198e-07	C2	CSRP1
6.95699e-12	0.2775	1	0.991	4.06198e-07	C2	TRIM6
7.82759e-12	0.591275	1	1	4.57029e-07	C2	GRAMD3
7.82759e-12	0.506165	1	1	4.57029e-07	C2	PTPN14
7.82759e-12	0.43428	1	1	4.57029e-07	C2	TUBB6
8.0614e-12	0.343616	1	1	4.70681e-07	C2	LIMA1
9.06704e-12	0.639475	1	1	5.29398e-07	C2	SOD3
9.33707e-12	0.51031	1	1	5.45163e-07	C2	MXRA8
9.61497e-12	0.529867	1	1	5.61389e-07	C2	KIAA1217
1.04982e-11	0.79364	1	1	6.12958e-07	C2	VGLL3
1.04982e-11	0.29508	1	1	6.12958e-07	C2	S100A11
1.08099e-11	0.580329	1	1	6.31157e-07	C2	OAF
1.08099e-11	0.36353	1	1	6.31157e-07	C2	LHFP
1.14607e-11	0.584821	1	1	6.69158e-07	C2	TGIF1
1.14607e-11	0.520026	1	1	6.69158e-07	C2	KIRREL
1.14607e-11	0.47998	1	1	6.69158e-07	C2	DAB2
1.18004e-11	0.381706	1	1	6.8899e-07	C2	HEYL
1.21499e-11	0.582171	1	1	7.09397e-07	C2	ADAMTS1
1.21499e-11	0.568725	1	1	7.09397e-07	C2	SSPN
1.21499e-11	0.521923	1	1	7.09397e-07	C2	ARHGAP10
1.28796e-11	0.601081	1	1	7.52004e-07	C2	MYO10
1.36523e-11	0.438355	1	1	7.97114e-07	C2	ARHGAP6
1.36523e-11	0.419644	1	1	7.97114e-07	C2	EHD2
1.40554e-11	0.663447	1	1	8.20653e-07	C2	IL1R1
1.53361e-11	0.343653	1	1	8.95427e-07	C2	ST5
1.62526e-11	0.548805	1	1	9.48942e-07	C2	SIX5
1.67308e-11	0.326503	1	1	9.76862e-07	C2	COL18A1
1.72228e-11	0.360861	1	1	1.00559e-06	C2	ID3
1.77289e-11	0.301955	1	1	1.03514e-06	C2	NAALADL2
1.82495e-11	0.525522	1	1	1.06554e-06	C2	CYR61
1.82495e-11	0.298973	1	1	1.06554e-06	C2	DNAJC1
1.93362e-11	0.442466	1	1	1.12898e-06	C2	CDH11
1.9903e-11	0.605128	1	1	1.16208e-06	C2	SERTAD1
1.9903e-11	0.571593	1	1	1.16208e-06	C2	SASH1
1.9903e-11	0.554826	1	1	1.16208e-06	C2	PHLDB2
1.9903e-11	0.533352	1	1	1.16208e-06	C2	MYO1E
1.9903e-11	0.530774	1	1	1.16208e-06	C2	MN1
2.04861e-11	0.552902	1	1	1.19612e-06	C2	PDGFA
2.04861e-11	0.348815	1	1	1.19612e-06	C2	ANXA2
2.17029e-11	0.660647	1	1	1.26716e-06	C2	TNFRSF12A
2.36618e-11	0.426281	1	1	1.38154e-06	C2	RNASE1
2.36618e-11	0.412567	1	1	1.38154e-06	C2	GNG11
2.43524e-11	0.400013	1	1	1.42187e-06	C2	SYNPO
2.57935e-11	0.431601	1	1	1.506e-06	C2	FGD5
2.65449e-11	0.589458	1	1	1.54988e-06	C2	GLT8D2
2.73178e-11	0.467151	1	1	1.59501e-06	C2	NEXN
2.81128e-11	0.398342	1	1	1.64142e-06	C2	ITGB5
2.81128e-11	0.386497	1	1	1.64142e-06	C2	ANXA4
2.97711e-11	0.533309	1	1	1.73825e-06	C2	COL5A3
2.97711e-11	0.351698	1	1	1.73825e-06	C2	DUSP1
3.15251e-11	0.452239	1	1	1.84066e-06	C2	FAM26E
3.24345e-11	0.355251	1	0.973	1.89376e-06	C2	RNASE4
3.33801e-11	0.389732	1	1	1.94896e-06	C2	ELK3
3.53418e-11	0.544345	1	1	2.0635e-06	C2	TMEM200B
3.63645e-11	0.332686	1	1	2.12321e-06	C2	CRTAP
3.74161e-11	0.763089	1	1	2.18462e-06	C2	COL14A1
3.74161e-11	0.516506	1	1	2.18462e-06	C2	GGT5
3.74161e-11	0.283801	1	1	2.18462e-06	C2	FCGRT
4.07528e-11	0.620228	1	0.991	2.37944e-06	C2	ANG
4.19285e-11	0.512482	1	1	2.44808e-06	C2	PALMD
4.19285e-11	0.442527	1	1	2.44808e-06	C2	TNFRSF1A
4.19285e-11	0.432307	1	1	2.44808e-06	C2	CD93
4.19285e-11	0.426506	1	1	2.44808e-06	C2	MFGE8
4.19285e-11	0.394815	1	1	2.44808e-06	C2	ANGPTL2
4.19285e-11	0.38463	1	1	2.44808e-06	C2	STK3
4.43801e-11	0.709679	1	1	2.59122e-06	C2	INHBA
4.43801e-11	0.413734	1	1	2.59122e-06	C2	KLF6
4.69719e-11	0.31181	1	1	2.74255e-06	C2	A2M
4.83153e-11	0.340668	1	0.973	2.82098e-06	C2	TMEM92
4.83227e-11	0.552281	1	1	2.82142e-06	C2	ADAMTS12
4.83227e-11	0.497836	1	1	2.82142e-06	C2	LMOD1
5.26073e-11	0.489437	1	1	3.07158e-06	C2	EPHA2
5.26073e-11	0.471706	1	1	3.07158e-06	C2	PVRL2
5.56679e-11	0.596157	1	1	3.25028e-06	C2	STARD13
5.72628e-11	0.837791	1	1	3.34341e-06	C2	OSR2
5.72628e-11	0.498751	1	1	3.34341e-06	C2	PLIN3
5.72628e-11	0.282547	1	1	3.34341e-06	C2	CIB1
6.05879e-11	0.685287	1	1	3.53755e-06	C2	FOXC2
6.23206e-11	0.448938	1	1	3.63871e-06	C2	WWC2
6.23206e-11	0.288006	1	1	3.63871e-06	C2	COL4A1
6.41017e-11	0.541608	1	1	3.7427e-06	C2	PRKD1
6.41017e-11	0.266023	1	1	3.7427e-06	C2	VIM
6.59325e-11	0.302757	1	1	3.8496e-06	C2	SORBS3
6.97489e-11	0.44798	1	1	4.07243e-06	C2	TGFBI
7.3781e-11	0.507233	1	1	4.30785e-06	C2	FBXO32
7.58817e-11	0.697694	1	1	4.4305e-06	C2	CSRNP1
7.58817e-11	0.486066	1	1	4.4305e-06	C2	LTBR
7.58817e-11	0.44181	1	0.991	4.4305e-06	C2	CRYBB1
7.58817e-11	0.413977	1	1	4.4305e-06	C2	ITPRIPL2
7.80408e-11	0.587663	1	1	4.55657e-06	C2	GLI3
7.80408e-11	0.5119	1	1	4.55657e-06	C2	TMEM200A
8.026e-11	0.603076	1	1	4.68614e-06	C2	CFH
8.026e-11	0.507764	1	1	4.68614e-06	C2	ITGA2
8.25408e-11	0.405408	1	1	4.81931e-06	C2	LRP10
8.97702e-11	0.45258	1	0.991	5.24141e-06	C2	ARSJ
9.23149e-11	0.618463	1	1	5.38999e-06	C2	PRRX1
9.23149e-11	0.614108	1	1	5.38999e-06	C2	OLFML3
9.23149e-11	0.553926	1	1	5.38999e-06	C2	SNTB1
9.493e-11	0.410792	1	1	5.54268e-06	C2	LGALS3
9.76176e-11	0.372725	1	1	5.6996e-06	C2	RRAS
1.00379e-10	0.518527	1	1	5.86085e-06	C2	CLEC3B
1.06134e-10	0.38342	1	1	6.19686e-06	C2	PDIA5
1.06134e-10	0.305477	1	1	6.19686e-06	C2	CTSK
1.09131e-10	0.601067	1	1	6.37185e-06	C2	THBS1
1.09131e-10	0.4248	1	1	6.37185e-06	C2	KIAA1462
1.09131e-10	0.283837	1	1	6.37185e-06	C2	ADAM9
1.12211e-10	0.711356	1	1	6.55168e-06	C2	TNFAIP6
1.12211e-10	0.572392	1	1	6.55168e-06	C2	NID2
1.12211e-10	0.399715	1	1	6.55168e-06	C2	CADPS2
1.18628e-10	0.547459	1	1	6.92632e-06	C2	KAL1
1.18628e-10	0.449438	1	1	6.92632e-06	C2	LENG9
1.18628e-10	0.41232	1	1	6.92632e-06	C2	DUSP6
1.21969e-10	0.669653	1	1	7.12142e-06	C2	ZCCHC24
1.21969e-10	0.490831	1	1	7.12142e-06	C2	ITGA5
1.25403e-10	0.676814	1	1	7.32188e-06	C2	MMP28
1.25403e-10	0.573456	1	1	7.32188e-06	C2	FOSL2
1.25403e-10	0.365005	1	1	7.32188e-06	C2	IFITM2
1.2893e-10	0.546075	1	1	7.52786e-06	C2	LRP4
1.2893e-10	0.492248	1	1	7.52786e-06	C2	PON2
1.44037e-10	0.39991	1	1	8.4099e-06	C2	EFEMP2
1.48076e-10	0.503118	1	1	8.64573e-06	C2	TRIP10
1.52226e-10	0.589941	1	1	8.88803e-06	C2	MSR1
1.52226e-10	0.506681	1	1	8.88803e-06	C2	RASL12
1.56489e-10	0.6645	1	1	9.13695e-06	C2	GADD45B
1.56489e-10	0.521907	1	1	9.13695e-06	C2	PROSER2
1.60869e-10	0.529505	1	1	9.39268e-06	C2	MICA
1.60869e-10	0.421418	1	1	9.39268e-06	C2	PDE1A
1.60869e-10	0.372688	1	1	9.39268e-06	C2	EVA1B
1.65369e-10	0.599413	1	1	9.6554e-06	C2	IL1RAP
1.67199e-10	0.418556	1	0.874	9.76226e-06	C2	GALNT5
1.69991e-10	0.612521	1	1	9.92529e-06	C2	ACOX2
1.69991e-10	0.499164	1	1	9.92529e-06	C2	AHNAK
1.69991e-10	0.433069	1	1	9.92529e-06	C2	TEAD2
1.7474e-10	0.424768	1	1	1.02026e-05	C2	MAML2
1.7474e-10	0.361082	1	1	1.02026e-05	C2	JUNB
1.8463e-10	0.576984	1	1	1.078e-05	C2	LOX
1.8463e-10	0.375735	1	1	1.078e-05	C2	C10orf11
1.89777e-10	0.50839	1	1	1.10805e-05	C2	RASD1
1.95065e-10	0.592081	1	1	1.13893e-05	C2	FRMD6
1.95065e-10	0.459466	1	1	1.13893e-05	C2	HAAO
1.95065e-10	0.371379	1	1	1.13893e-05	C2	NOTCH3
2.00497e-10	0.484708	1	1	1.17064e-05	C2	NBL1
2.00497e-10	0.438825	1	1	1.17064e-05	C2	FOS
2.00497e-10	0.389595	1	1	1.17064e-05	C2	MGP
2.00497e-10	0.366155	1	1	1.17064e-05	C2	SUCLG2
2.06076e-10	0.46859	1	1	1.20322e-05	C2	PDGFD
2.11807e-10	0.648322	1	1	1.23668e-05	C2	DAAM2
2.11807e-10	0.457878	1	1	1.23668e-05	C2	GLIS3
2.17694e-10	0.346326	1	1	1.27105e-05	C2	PEAK1
2.2995e-10	0.566844	1	1	1.34261e-05	C2	HTRA3
2.36328e-10	0.292177	1	1	1.37985e-05	C2	PPAP2A
2.49608e-10	0.388792	1	1	1.45738e-05	C2	CTSO
2.49608e-10	0.319976	1	1	1.45738e-05	C2	SDC2
2.56518e-10	0.602484	1	1	1.49773e-05	C2	YBX3
2.56518e-10	0.420482	1	1	1.49773e-05	C2	TRIP6
2.56518e-10	0.320818	1	1	1.49773e-05	C2	IFITM3
2.63615e-10	0.778437	1	1	1.53917e-05	C2	COL8A1
2.70904e-10	0.381283	1	1	1.58173e-05	C2	GPR124
2.70904e-10	0.270062	1	1	1.58173e-05	C2	ACVR1
2.78389e-10	0.493437	1	1	1.62543e-05	C2	FAT1
2.86076e-10	0.407219	1	1	1.67031e-05	C2	CREB3L2
2.93971e-10	0.416342	1	1	1.71641e-05	C2	ELTD1
2.93971e-10	0.290431	1	1	1.71641e-05	C2	SUMF1
3.02077e-10	0.387026	1	1	1.76374e-05	C2	GPR116
3.10403e-10	0.494777	1	1	1.81235e-05	C2	BICC1
3.10403e-10	0.343822	1	1	1.81235e-05	C2	PQLC3
3.18952e-10	0.480158	1	1	1.86226e-05	C2	ATP10A
3.18952e-10	0.349296	1	1	1.86226e-05	C2	LPP
3.2773e-10	0.424566	1	1	1.91352e-05	C2	EGR1
3.36733e-10	0.258372	1	0.982	1.96608e-05	C2	FANK1
3.36745e-10	0.721857	1	1	1.96615e-05	C2	MT1E
3.46001e-10	0.782113	1	1	2.0202e-05	C2	FNDC1
3.55506e-10	0.897667	1	1	2.07569e-05	C2	KLF4
3.55506e-10	0.477458	1	1	2.07569e-05	C2	HBEGF
3.55506e-10	0.270938	1	1	2.07569e-05	C2	MSN
3.65265e-10	0.624962	1	1	2.13267e-05	C2	SOX17
3.65265e-10	0.590659	1	1	2.13267e-05	C2	NNMT
3.65265e-10	0.487867	1	1	2.13267e-05	C2	SMOC2
3.65265e-10	0.482291	1	1	2.13267e-05	C2	EDNRA
3.75286e-10	0.610737	1	1	2.19118e-05	C2	CCDC80
3.85575e-10	0.484282	1	1	2.25126e-05	C2	SGK1
3.9614e-10	0.37081	1	1	2.31294e-05	C2	LAMA4
4.06986e-10	0.64442	1	1	2.37627e-05	C2	SRPX2
4.06986e-10	0.478279	1	1	2.37627e-05	C2	CXCL16
4.06986e-10	0.342609	1	1	2.37627e-05	C2	RBMS2
4.18123e-10	0.371434	1	1	2.44129e-05	C2	IL13RA1
4.29556e-10	0.722141	1	1	2.50805e-05	C2	SRPX
4.29556e-10	0.545187	1	1	2.50805e-05	C2	FZD7
4.29556e-10	0.375593	1	1	2.50805e-05	C2	CCDC3
4.39458e-10	0.512115	0.975	0.928	2.56586e-05	C2	CCL26
4.53346e-10	0.665353	1	1	2.64695e-05	C2	CRYAB
4.53346e-10	0.494352	1	1	2.64695e-05	C2	TMEM133
4.53346e-10	0.419537	1	1	2.64695e-05	C2	RBPMS
4.65719e-10	0.421045	1	1	2.71919e-05	C2	GSN
4.65719e-10	0.270102	1	1	2.71919e-05	C2	AEBP1
4.78421e-10	0.54109	1	1	2.79335e-05	C2	KANK1
4.9146e-10	0.447485	1	1	2.86949e-05	C2	GHR
5.00186e-10	0.378954	1	0.775	2.92044e-05	C2	MSX2
5.04847e-10	0.495156	1	1	2.94765e-05	C2	RHOJ
5.04847e-10	0.459025	1	1	2.94765e-05	C2	NFIA
5.04847e-10	0.281968	1	1	2.94765e-05	C2	ENG
5.18589e-10	0.723825	1	1	3.02788e-05	C2	FGF1
5.18589e-10	0.502169	1	1	3.02788e-05	C2	ARHGAP42
5.18589e-10	0.401185	1	1	3.02788e-05	C2	ZFP36L1
5.32696e-10	0.632523	1	1	3.11025e-05	C2	PLN
5.32696e-10	0.340599	1	1	3.11025e-05	C2	TGFB1I1
5.47177e-10	0.461924	1	1	3.1948e-05	C2	FOXS1
5.62041e-10	0.493747	1	1	3.28159e-05	C2	S100A10
5.773e-10	0.643849	1	1	3.37068e-05	C2	FZD1
5.773e-10	0.588079	1	1	3.37068e-05	C2	GXYLT2
5.92963e-10	0.530373	1	1	3.46213e-05	C2	BAG3
5.92963e-10	0.529491	1	1	3.46213e-05	C2	KLF5
6.0904e-10	0.638248	1	1	3.556e-05	C2	COL21A1
6.0904e-10	0.632389	1	1	3.556e-05	C2	TPBG
6.25542e-10	0.515315	1	1	3.65235e-05	C2	MDFIC
6.25542e-10	0.394618	1	1	3.65235e-05	C2	TMEM173
6.4248e-10	0.339729	1	1	3.75125e-05	C2	MAP7D3
6.77709e-10	0.722767	1	1	3.95694e-05	C2	PLEKHA4
6.77709e-10	0.468733	1	1	3.95694e-05	C2	PLAU
6.96023e-10	0.394104	1	1	4.06387e-05	C2	MAF
7.1482e-10	0.586775	1	1	4.17362e-05	C2	FCGR2A
7.34112e-10	0.644552	1	1	4.28626e-05	C2	HSPB6
7.34112e-10	0.454502	1	1	4.28626e-05	C2	JDP2
7.34112e-10	0.311912	1	1	4.28626e-05	C2	PLXND1
7.53911e-10	0.516463	1	1	4.40186e-05	C2	SMIM10
7.53911e-10	0.449492	1	0.991	4.40186e-05	C2	HSPB2
7.53911e-10	0.266181	1	1	4.40186e-05	C2	REXO2
7.7423e-10	0.44893	1	1	4.5205e-05	C2	BHLHE40
7.95084e-10	0.61662	1	1	4.64226e-05	C2	NFIX
8.16485e-10	0.469508	1	1	4.76721e-05	C2	HSPG2
8.38448e-10	0.423085	1	1	4.89544e-05	C2	PCSK5
8.60986e-10	0.307187	1	1	5.02704e-05	C2	ITGAV
8.84115e-10	0.271867	1	1	5.16208e-05	C2	KIFC3
9.07849e-10	0.64912	1	1	5.30066e-05	C2	PLSCR4
9.32205e-10	0.604562	1	1	5.44286e-05	C2	DUSP5
9.32205e-10	0.458201	1	1	5.44286e-05	C2	FHL2
9.32205e-10	0.427459	1	1	5.44286e-05	C2	ERG
9.57197e-10	0.556381	1	1	5.58879e-05	C2	HMCN1
9.57197e-10	0.449426	1	1	5.58879e-05	C2	TINAGL1
9.57197e-10	0.393345	1	1	5.58879e-05	C2	CAV1
9.57197e-10	0.325103	1	1	5.58879e-05	C2	PPP2R5A
9.82186e-10	0.571987	1	0.955	5.73469e-05	C2	FAM180A
1.03616e-09	0.409577	1	1	6.04981e-05	C2	SYPL2
1.03616e-09	0.373279	1	1	6.04981e-05	C2	SPRY4
1.06386e-09	0.426166	1	1	6.21158e-05	C2	PLEKHG1
1.09229e-09	0.808836	1	1	6.37755e-05	C2	F3
1.12146e-09	0.588428	1	1	6.54785e-05	C2	RHBDF1
1.12146e-09	0.443213	1	1	6.54785e-05	C2	MAP3K6
1.12146e-09	0.414721	1	1	6.54785e-05	C2	ARHGAP18
1.14818e-09	0.510655	1	0.928	6.7039e-05	C2	NRK
1.15138e-09	0.311989	1	1	6.72258e-05	C2	SGMS1
1.21359e-09	0.517378	1	1	7.08578e-05	C2	CEBPD
1.21359e-09	0.410252	1	1	7.08578e-05	C2	PROCR
1.21359e-09	0.290862	1	1	7.08578e-05	C2	TPM2
1.24591e-09	0.471082	1	1	7.27449e-05	C2	HFE
1.24591e-09	0.276826	1	1	7.27449e-05	C2	PLTP
1.27907e-09	0.449383	1	1	7.46809e-05	C2	ZFP36
1.27907e-09	0.445007	1	1	7.46809e-05	C2	EPHB4
1.27907e-09	0.278547	1	1	7.46809e-05	C2	SH3BGRL
1.34798e-09	0.280737	1	1	7.87047e-05	C2	TIMP1
1.38379e-09	0.594116	1	1	8.07951e-05	C2	ANGPTL1
1.38379e-09	0.330396	1	1	8.07951e-05	C2	ECM1
1.42051e-09	0.494315	1	1	8.29396e-05	C2	LTBP2
1.49685e-09	0.662376	1	1	8.73963e-05	C2	THBD
1.49685e-09	0.389524	1	1	8.73963e-05	C2	MYLIP
1.57717e-09	0.815481	1	1	9.20861e-05	C2	DCN
1.57717e-09	0.607706	1	1	9.20861e-05	C2	ITPRIP
1.57717e-09	0.454699	1	1	9.20861e-05	C2	TM4SF1
1.57717e-09	0.31778	1	1	9.20861e-05	C2	CLEC11A
1.61889e-09	0.343488	1	1	9.45221e-05	C2	B4GALT1
1.66168e-09	0.381755	1	1	9.70208e-05	C2	CASP7
1.66168e-09	0.328896	1	1	9.70208e-05	C2	ACTA2
1.70558e-09	0.433266	1	1	9.95838e-05	C2	TCF7L1
1.70558e-09	0.362042	1	1	9.95838e-05	C2	ATP8B1
1.70558e-09	0.345708	1	1	9.95838e-05	C2	VASN
1.75061e-09	0.543926	1	1	0.000102213	C2	HRH1
1.79679e-09	0.486384	1	1	0.000104909	C2	NPNT
1.84416e-09	0.36504	1	1	0.000107675	C2	RILPL2
1.9937e-09	0.540673	1	1	0.000116406	C2	MT2A
2.09988e-09	0.449804	1	1	0.000122606	C2	NR2F2
2.09988e-09	0.432819	1	1	0.000122606	C2	LPAR6
2.09988e-09	0.350197	1	1	0.000122606	C2	MRVI1
2.15501e-09	0.601381	1	1	0.000125825	C2	FAM129A
2.15501e-09	0.469401	1	1	0.000125825	C2	CDA
2.21156e-09	0.381319	1	1	0.000129126	C2	ANXA11
2.26955e-09	0.521584	1	1	0.000132512	C2	SMIM3
2.26955e-09	0.27856	1	1	0.000132512	C2	FRRS1
2.39001e-09	0.522368	1	1	0.000139546	C2	CEBPB
2.39001e-09	0.371033	1	1	0.000139546	C2	ZBTB47
2.39001e-09	0.367782	1	1	0.000139546	C2	SMAD7
2.39001e-09	0.321631	1	1	0.000139546	C2	EFNB1
2.45255e-09	0.378929	1	1	0.000143197	C2	AAED1
2.51669e-09	0.582429	1	1	0.000146942	C2	FBLN2
2.51669e-09	0.567114	1	1	0.000146942	C2	TMEM233
2.51669e-09	0.514672	1	1	0.000146942	C2	EMP2
2.58246e-09	0.631578	1	1	0.000150782	C2	TREM2
2.58246e-09	0.429808	1	1	0.000150782	C2	RREB1
2.6499e-09	0.570499	1	1	0.000154719	C2	LUM
2.6499e-09	0.50897	1	1	0.000154719	C2	PHYHD1
2.78996e-09	0.455736	1	1	0.000162897	C2	EMCN
2.86267e-09	0.442816	1	1	0.000167143	C2	IER3
2.86267e-09	0.282512	1	1	0.000167143	C2	SPRED1
3.01367e-09	0.408339	1	1	0.000175959	C2	TEAD3
3.09205e-09	0.403996	1	1	0.000180535	C2	STAB1
3.09205e-09	0.293509	1	1	0.000180535	C2	THRB
3.17241e-09	0.518973	1	1	0.000185228	C2	ENDOD1
3.17241e-09	0.509614	1	1	0.000185228	C2	ISLR
3.17241e-09	0.507102	1	1	0.000185228	C2	LRIG3
3.33928e-09	0.4205	1	1	0.000194971	C2	KAZALD1
3.42589e-09	0.441169	1	1	0.000200028	C2	EMP3
3.42589e-09	0.437691	1	0.991	0.000200028	C2	FOXF2
3.42589e-09	0.35184	1	1	0.000200028	C2	BDH2
3.42589e-09	0.298929	1	1	0.000200028	C2	DNASE2
3.51469e-09	0.429347	1	1	0.000205212	C2	SH3D19
3.60573e-09	0.633972	1	1	0.000210528	C2	MXRA5
3.60573e-09	0.366576	1	1	0.000210528	C2	TLR3
3.69905e-09	0.318828	1	1	0.000215977	C2	HEG1
3.79473e-09	0.54559	1	1	0.000221563	C2	ELL2
3.79473e-09	0.428615	1	1	0.000221563	C2	SNX33
3.89234e-09	0.624601	1	0.973	0.000227262	C2	FOXD1
3.89282e-09	0.553422	1	1	0.00022729	C2	PLAT
3.99337e-09	0.809399	1	1	0.000233161	C2	NR4A2
3.99337e-09	0.569775	1	1	0.000233161	C2	ASPN
3.99337e-09	0.412115	1	1	0.000233161	C2	AOC3
3.99337e-09	0.352343	1	1	0.000233161	C2	TGFB1
4.09645e-09	0.448656	1	1	0.000239179	C2	EYA2
4.20211e-09	0.489182	1	1	0.000245349	C2	NACC2
4.31043e-09	0.527726	1	1	0.000251673	C2	SVEP1
4.31043e-09	0.459659	1	1	0.000251673	C2	TLCD2
4.42146e-09	0.541119	1	1	0.000258156	C2	SNAI1
4.42146e-09	0.449864	1	1	0.000258156	C2	BDKRB2
4.53528e-09	0.583471	1	1	0.000264801	C2	MYH11
4.53528e-09	0.454255	1	1	0.000264801	C2	CD302
4.77152e-09	0.493987	1	1	0.000278595	C2	NOTCH2
4.89409e-09	0.423156	1	1	0.000285751	C2	ZMYM6NB
4.89409e-09	0.319455	1	1	0.000285751	C2	GNB4
5.14849e-09	0.445452	1	1	0.000300605	C2	TBXA2R
5.28047e-09	0.421495	1	1	0.000308311	C2	RIN3
5.41574e-09	0.558846	1	1	0.000316209	C2	EGFR
5.41574e-09	0.472668	1	1	0.000316209	C2	FAM198B
5.41574e-09	0.441511	1	1	0.000316209	C2	SH3RF3
5.55437e-09	0.492916	1	1	0.000324303	C2	C8orf4
5.55437e-09	0.430518	1	1	0.000324303	C2	SCN1B
5.69646e-09	0.34912	1	1	0.000332599	C2	STON1
5.69646e-09	0.346363	1	1	0.000332599	C2	PPP1R15A
5.84208e-09	0.665473	1	1	0.000341102	C2	AGT
5.84208e-09	0.556251	1	1	0.000341102	C2	PAMR1
6.14427e-09	0.588267	1	1	0.000358745	C2	SPHK1
6.14427e-09	0.524872	1	1	0.000358745	C2	SERPINE1
6.14427e-09	0.253053	1	1	0.000358745	C2	RIN2
6.46163e-09	0.605354	1	1	0.000377275	C2	ADAMTSL1
6.46163e-09	0.447525	1	1	0.000377275	C2	NT5E
6.46163e-09	0.394753	1	1	0.000377275	C2	MYLK
6.46163e-09	0.296031	1	1	0.000377275	C2	NBPF14
6.62624e-09	0.716476	1	1	0.000386886	C2	GPRC5A
6.62624e-09	0.593527	1	1	0.000386886	C2	AHR
6.62624e-09	0.372046	1	1	0.000386886	C2	AJUBA
6.79492e-09	0.403496	1	1	0.000396735	C2	ZNF469
6.79492e-09	0.262796	1	1	0.000396735	C2	DENND2C
6.96778e-09	0.962172	1	0.991	0.000406828	C2	OGN
6.96778e-09	0.465688	1	1	0.000406828	C2	PARD3B
6.96778e-09	0.272248	1	1	0.000406828	C2	EMILIN1
7.14491e-09	0.490467	1	1	0.00041717	C2	MPZL2
7.14491e-09	0.268187	1	1	0.00041717	C2	SUSD6
7.32641e-09	0.706196	1	1	0.000427767	C2	NR4A3
7.32641e-09	0.386202	1	1	0.000427767	C2	BCAM
7.5124e-09	0.539276	1	1	0.000438627	C2	CSPG4
7.5124e-09	0.507414	1	1	0.000438627	C2	AFAP1L2
7.5124e-09	0.263416	1	1	0.000438627	C2	FERMT2
7.70297e-09	0.79264	1	1	0.000449754	C2	PTGS2
7.70297e-09	0.424538	1	1	0.000449754	C2	ANTXR2
7.89825e-09	0.531792	1	1	0.000461155	C2	CPED1
7.89825e-09	0.405806	1	1	0.000461155	C2	MERTK
8.09833e-09	0.457173	1	1	0.000472837	C2	COX7A1
8.30333e-09	0.771469	1	1	0.000484807	C2	LAMA2
8.30333e-09	0.574663	1	1	0.000484807	C2	OSMR
8.30333e-09	0.388983	1	1	0.000484807	C2	FSTL3
8.51338e-09	0.448599	1	1	0.000497071	C2	ZEB2
8.72859e-09	0.287993	1	1	0.000509636	C2	HOMER3
9.17499e-09	0.714345	1	1	0.0005357	C2	ITGBL1
9.17499e-09	0.304524	1	1	0.0005357	C2	RAP2B
9.17499e-09	0.273836	1	1	0.0005357	C2	H2AFJ
9.40644e-09	0.534429	1	1	0.000549214	C2	MSX1
9.40644e-09	0.52986	1	1	0.000549214	C2	NEDD9
9.40644e-09	0.261322	1	1	0.000549214	C2	CAST
9.64356e-09	0.563506	1	1	0.000563059	C2	OLFML2A
9.64356e-09	0.457571	1	1	0.000563059	C2	BACE2
9.64356e-09	0.393614	1	1	0.000563059	C2	WTIP
9.88648e-09	0.460757	1	1	0.000577242	C2	CLEC2B
9.88648e-09	0.427735	1	1	0.000577242	C2	SGCD
9.88648e-09	0.398158	1	1	0.000577242	C2	VWA1
9.88648e-09	0.26534	1	1	0.000577242	C2	COQ10B
1.01351e-08	0.779478	1	0.982	0.000591755	C2	FST
1.03796e-08	0.381833	1	0.946	0.000606035	C2	FAM69C
1.03903e-08	0.547361	1	1	0.000606659	C2	S1PR3
1.06515e-08	0.479228	1	1	0.000621908	C2	A4GALT
1.06515e-08	0.432734	1	0.991	0.000621908	C2	FOXD2
1.09187e-08	0.466948	1	0.982	0.000637512	C2	HPGDS
1.11931e-08	0.401655	1	1	0.000653533	C2	PLEK2
1.14739e-08	0.287982	1	1	0.000669926	C2	KDELC2
1.14739e-08	0.287502	1	0.991	0.000669926	C2	SLC4A4
1.17615e-08	0.548109	1	1	0.000686719	C2	IL34
1.17615e-08	0.52149	1	1	0.000686719	C2	HEY2
1.17615e-08	0.35215	1	1	0.000686719	C2	TNFSF12
1.20266e-08	0.507392	1	0.928	0.0007022	C2	KCNK1
1.20561e-08	0.497463	1	1	0.00070392	C2	SOX7
1.23579e-08	0.385997	1	1	0.000721539	C2	CNN2
1.23579e-08	0.376845	1	1	0.000721539	C2	PLA2R1
1.2667e-08	0.776798	1	1	0.000739587	C2	PDGFRL
1.2667e-08	0.538923	1	1	0.000739587	C2	ABCG2
1.2667e-08	0.465534	1	1	0.000739587	C2	SPRY1
1.2667e-08	0.344594	1	1	0.000739587	C2	MMRN2
1.2667e-08	0.30585	1	1	0.000739587	C2	SLC30A1
1.29836e-08	0.898318	1	0.991	0.000758073	C2	SFRP4
1.29836e-08	0.334646	1	1	0.000758073	C2	RIPK2
1.33079e-08	0.342052	1	1	0.000777008	C2	VAMP5
1.364e-08	0.824219	1	1	0.000796401	C2	FOSB
1.364e-08	0.415448	1	0.991	0.000796401	C2	TPD52L1
1.39803e-08	0.408096	1	1	0.000816265	C2	B3GNT9
1.43287e-08	0.612073	1	1	0.00083661	C2	RUNX2
1.43287e-08	0.507175	1	1	0.00083661	C2	ADAMTS15
1.46856e-08	0.499476	1	1	0.000857447	C2	SOCS3
1.54254e-08	0.498607	1	1	0.000900643	C2	ATF3
1.54254e-08	0.394414	1	1	0.000900643	C2	C3orf58
1.54254e-08	0.310509	1	1	0.000900643	C2	AKAP13
1.58088e-08	0.489931	1	1	0.000923027	C2	TBX18
1.58088e-08	0.389545	1	1	0.000923027	C2	FILIP1L
1.62014e-08	0.459533	1	0.991	0.000945951	C2	PLA2G5
1.66035e-08	0.348856	1	1	0.000969427	C2	MRO
1.66035e-08	0.324407	1	1	0.000969427	C2	ESAM
1.70152e-08	0.663274	1	1	0.000993469	C2	VSIG4
1.70152e-08	0.480446	1	1	0.000993469	C2	FCGR3A
1.70152e-08	0.422317	1	1	0.000993469	C2	HRC
1.70152e-08	0.268595	1	1	0.000993469	C2	MOCOS
1.74369e-08	0.308633	1	1	0.00101809	C2	ETV6
1.78687e-08	0.416643	1	1	0.0010433	C2	ENPEP
1.78687e-08	0.402632	1	1	0.0010433	C2	SERPINF1
1.83109e-08	0.469565	1	1	0.00106912	C2	ID4
1.83109e-08	0.408158	1	1	0.00106912	C2	EDN1
1.87637e-08	0.527622	1	1	0.00109556	C2	C1R
1.87637e-08	0.274024	1	1	0.00109556	C2	C1orf54
1.92274e-08	0.422239	1	1	0.00112263	C2	PROS1
1.95636e-08	0.296264	0.975	0.865	0.00114226	C2	XIRP1
1.97022e-08	0.433819	1	1	0.00115035	C2	P2RY1
1.97022e-08	0.330129	1	1	0.00115035	C2	ST3GAL4
2.01884e-08	0.653031	1	1	0.00117874	C2	NTM
2.01884e-08	0.428971	1	1	0.00117874	C2	HES1
2.01884e-08	0.295373	1	1	0.00117874	C2	KLHL5
2.06862e-08	0.577235	1	1	0.0012078	C2	ITGA11
2.06862e-08	0.439402	1	1	0.0012078	C2	ARHGAP31
2.06862e-08	0.345399	1	1	0.0012078	C2	EVC2
2.11959e-08	0.504073	1	1	0.00123756	C2	WFDC1
2.17178e-08	0.439986	1	1	0.00126804	C2	WIPI1
2.22515e-08	0.690337	1	0.982	0.0012992	C2	ARSI
2.22521e-08	0.58012	1	0.991	0.00129924	C2	CYS1
2.22521e-08	0.427558	1	1	0.00129924	C2	NOTCH1
2.27993e-08	0.386095	1	1	0.00133118	C2	KCNMB1
2.39329e-08	0.567859	1	1	0.00139737	C2	BOC
2.39329e-08	0.325413	1	1	0.00139737	C2	RGCC
2.39329e-08	0.305495	1	1	0.00139737	C2	OTUD1
2.45201e-08	0.609696	1	1	0.00143166	C2	EGR2
2.45201e-08	0.352873	1	1	0.00143166	C2	CITED2
2.45201e-08	0.339992	1	1	0.00143166	C2	CLEC14A
2.51212e-08	0.428499	1	1	0.00146675	C2	TRPV4
2.57367e-08	0.470216	1	1	0.00150269	C2	PLBD1
2.57367e-08	0.43175	1	1	0.00150269	C2	RAB34
2.57367e-08	0.369291	1	1	0.00150269	C2	S100A4
2.63667e-08	0.409318	1	1	0.00153947	C2	SMAD6
2.63667e-08	0.404811	1	1	0.00153947	C2	EPB41L2
2.63667e-08	0.300831	1	1	0.00153947	C2	RILP
2.76721e-08	0.787466	1	1	0.00161569	C2	TFPI2
2.76721e-08	0.55429	1	1	0.00161569	C2	MMP19
2.76721e-08	0.442026	1	1	0.00161569	C2	CXCL12
2.76721e-08	0.317414	1	1	0.00161569	C2	GAS2L1
2.76721e-08	0.265175	1	1	0.00161569	C2	GLMP
2.76721e-08	0.262732	1	1	0.00161569	C2	F2R
2.8348e-08	0.410034	1	1	0.00165516	C2	CALCRL
2.8348e-08	0.40027	1	1	0.00165516	C2	SHROOM4
2.8348e-08	0.295769	1	1	0.00165516	C2	KLHL21
2.97483e-08	0.404803	1	1	0.00173692	C2	TANC1
3.04734e-08	0.375607	1	1	0.00177925	C2	SYNJ2
3.04734e-08	0.375082	1	1	0.00177925	C2	NQO1
3.12157e-08	0.511691	1	0.991	0.00182259	C2	RHOD
3.12157e-08	0.500267	1	1	0.00182259	C2	NR4A1
3.19754e-08	0.579783	1	1	0.00186695	C2	CFI
3.19754e-08	0.497964	1	1	0.00186695	C2	OSGIN1
3.19754e-08	0.469162	1	1	0.00186695	C2	METRNL
3.27531e-08	0.369714	1	1	0.00191236	C2	KCTD12
3.43639e-08	0.48174	1	1	0.00200641	C2	SEMA6B
3.43639e-08	0.424848	1	1	0.00200641	C2	ITGA6
3.51979e-08	0.392378	1	1	0.0020551	C2	MEF2C
3.51979e-08	0.35493	1	1	0.0020551	C2	TNS2
3.51979e-08	0.323436	1	1	0.0020551	C2	COBLL1
3.60514e-08	0.358313	1	1	0.00210494	C2	CCDC102A
3.69251e-08	0.52191	1	1	0.00215594	C2	LDHD
3.69251e-08	0.331133	1	1	0.00215594	C2	SPARCL1
3.69251e-08	0.316589	1	1	0.00215594	C2	AQP1
3.78192e-08	0.499154	1	1	0.00220815	C2	GNA15
3.87343e-08	0.389394	1	1	0.00226158	C2	RNF217
4.06295e-08	0.3687	1	1	0.00237223	C2	PLK2
4.16104e-08	0.413928	1	1	0.00242951	C2	GJA1
4.16104e-08	0.361076	1	1	0.00242951	C2	GPR137B
4.16104e-08	0.286865	1	1	0.00242951	C2	TACC1
4.26143e-08	0.460953	1	1	0.00248812	C2	ZMYND15
4.26143e-08	0.345797	1	1	0.00248812	C2	SCARF2
4.36417e-08	0.395074	1	1	0.00254811	C2	CRIM1
4.46931e-08	0.488937	1	1	0.0026095	C2	BTBD19
4.46931e-08	0.332778	1	1	0.0026095	C2	CD34
4.5769e-08	0.514133	1	1	0.00267232	C2	COL27A1
4.5769e-08	0.419615	1	0.991	0.00267232	C2	GSTM5
4.687e-08	0.630282	1	1	0.0027366	C2	SPON1
4.687e-08	0.365208	1	1	0.0027366	C2	CD248
4.79967e-08	0.477376	1	1	0.00280238	C2	SOX13
4.91496e-08	0.39136	1	1	0.0028697	C2	PPAP2B
4.91496e-08	0.287427	1	1	0.0028697	C2	MITF
5.15365e-08	0.40834	1	1	0.00300906	C2	PREX2
5.15365e-08	0.371889	1	1	0.00300906	C2	IGF1
5.27717e-08	0.3356	1	1	0.00308118	C2	ADAP2
5.40355e-08	0.665874	1	1	0.00315497	C2	MAMDC2
5.40355e-08	0.359545	1	1	0.00315497	C2	PTPRB
5.66519e-08	0.542278	1	1	0.00330773	C2	ABI3BP
5.80057e-08	0.629039	1	1	0.00338678	C2	CPXM2
5.80057e-08	0.463205	1	1	0.00338678	C2	SELENBP1
5.80057e-08	0.368352	1	1	0.00338678	C2	ARHGAP24
5.80057e-08	0.339794	1	1	0.00338678	C2	SH3BP5
5.80057e-08	0.251836	1	1	0.00338678	C2	ABHD4
5.80057e-08	0.251282	1	1	0.00338678	C2	MYO1D
6.08079e-08	0.339788	1	1	0.00355039	C2	ABHD15
6.22578e-08	0.321478	1	1	0.00363505	C2	PDLIM1
6.37411e-08	0.368676	1	1	0.00372165	C2	CD58
6.52587e-08	0.470989	1	1	0.00381026	C2	C1S
6.52587e-08	0.438771	1	1	0.00381026	C2	PCDH18
6.68112e-08	0.320492	1	1	0.00390091	C2	ANGPT1
6.83977e-08	0.445568	1	0.982	0.00399354	C2	CLEC5A
6.83995e-08	0.385642	1	1	0.00399364	C2	ECSCR
6.83995e-08	0.261289	1	1	0.00399364	C2	GLIPR2
7.16866e-08	0.412299	1	1	0.00418556	C2	TNS3
7.16866e-08	0.343856	1	1	0.00418556	C2	SUGCT
7.33869e-08	0.493246	1	0.991	0.00428484	C2	APOL4
7.33869e-08	0.356417	1	1	0.00428484	C2	ITGA9
7.68657e-08	0.289151	1	0.955	0.00448796	C2	S100A2
7.87258e-08	0.374684	1	1	0.00459656	C2	MR1
7.87258e-08	0.368721	1	1	0.00459656	C2	REST
7.87258e-08	0.345302	1	0.991	0.00459656	C2	CFAP45
7.87258e-08	0.281471	1	1	0.00459656	C2	FKBP10
8.05876e-08	0.408918	1	1	0.00470527	C2	SEMA3G
8.05876e-08	0.381442	1	1	0.00470527	C2	MFSD7
8.05876e-08	0.33448	1	1	0.00470527	C2	FZD4
8.2492e-08	0.339389	1	1	0.00481646	C2	ACSS3
8.84703e-08	0.533257	1	1	0.00516552	C2	UST
8.84703e-08	0.273659	1	1	0.00516552	C2	FGFR1
9.05548e-08	0.513023	1	1	0.00528722	C2	BHLHE41
9.05548e-08	0.336088	1	1	0.00528722	C2	TSPO
9.26867e-08	0.431227	1	1	0.0054117	C2	TFPI
9.26867e-08	0.399167	1	1	0.0054117	C2	CYP7B1
9.26867e-08	0.398574	1	1	0.0054117	C2	VCAN
9.48672e-08	0.589802	1	1	0.00553901	C2	PHLDA2
9.48672e-08	0.33586	1	1	0.00553901	C2	SERPING1
9.93781e-08	0.565375	1	1	0.00580239	C2	TGFBR3
9.93781e-08	0.385207	1	1	0.00580239	C2	PER1
1.01711e-07	0.284838	1	1	0.00593859	C2	TMEM204
1.04096e-07	0.405766	1	1	0.00607787	C2	CARD6
1.04096e-07	0.399673	1	1	0.00607787	C2	KIF16B
1.06536e-07	0.58435	1	1	0.00622032	C2	KIAA1755
1.06536e-07	0.419983	1	1	0.00622032	C2	FMO4
1.09031e-07	0.322928	1	0.991	0.006366	C2	MALL
1.09031e-07	0.305304	1	1	0.006366	C2	PDGFB
1.14192e-07	0.387744	1	0.991	0.00666732	C2	ODF3L1
1.14192e-07	0.364825	1	1	0.00666732	C2	STARD8
1.14192e-07	0.319499	1	0.991	0.00666732	C2	CCDC170
1.1686e-07	0.428823	1	1	0.00682311	C2	CSF1
1.1686e-07	0.392346	1	1	0.00682311	C2	MICAL2
1.1686e-07	0.36784	1	1	0.00682311	C2	MGLL
1.1686e-07	0.362065	1	1	0.00682311	C2	RNF180
1.1686e-07	0.282142	1	1	0.00682311	C2	MVP
1.19589e-07	0.317085	1	1	0.00698242	C2	P4HA2
1.22379e-07	0.356109	1	1	0.00714533	C2	TMEM2
1.22379e-07	0.323897	1	1	0.00714533	C2	ASB9
1.25232e-07	0.539748	1	1	0.00731191	C2	SAMD5
1.25232e-07	0.45959	1	1	0.00731191	C2	SULF1
1.28149e-07	0.540856	1	1	0.00748225	C2	FOXC1
1.28149e-07	0.344365	1	1	0.00748225	C2	HNMT
1.28149e-07	0.290613	1	1	0.00748225	C2	RXRA
1.34183e-07	0.415699	1	1	0.00783452	C2	RFTN2
1.37301e-07	0.655736	1	1	0.00801661	C2	GPC3
1.4049e-07	0.413053	1	0.991	0.0082028	C2	CASQ2
1.4049e-07	0.333719	1	1	0.0082028	C2	CDH5
1.43747e-07	0.25077	1	0.982	0.00839296	C2	C10orf55
1.43751e-07	0.497802	1	1	0.00839317	C2	P4HA3
1.47084e-07	0.358929	1	1	0.0085878	C2	GYPC
1.47084e-07	0.328264	1	1	0.0085878	C2	LRRC17
1.50492e-07	0.587316	1	1	0.0087868	C2	MRGPRF
1.5754e-07	0.960147	1	0.991	0.00919827	C2	CXCL8
1.5754e-07	0.36044	1	1	0.00919827	C2	IFFO2
1.5754e-07	0.269361	1	1	0.00919827	C2	NPC2
1.61182e-07	0.515715	1	1	0.00941092	C2	KLF2
1.61182e-07	0.394084	1	1	0.00941092	C2	C11orf96
1.64901e-07	0.489954	1	0.982	0.00962809	C2	TREM1
1.64905e-07	0.268246	1	1	0.00962833	C2	SLC2A9
1.68708e-07	0.654379	1	0.982	0.00985035	C2	TIMP4
1.72604e-07	0.471014	1	1	0.0100778	C2	AKR1C3
1.72604e-07	0.403958	1	1	0.0100778	C2	GIPC3
1.72604e-07	0.325278	1	1	0.0100778	C2	PHACTR2
1.72604e-07	0.264782	1	1	0.0100778	C2	TEC
1.76582e-07	0.252009	1	1	0.0103101	C2	PBXIP1
1.80649e-07	0.501894	1	1	0.0105475	C2	TIPARP
1.80649e-07	0.442523	1	1	0.0105475	C2	ANO1
1.84806e-07	0.619001	1	1	0.0107903	C2	FBLN5
1.84806e-07	0.415417	1	1	0.0107903	C2	RASSF8
1.84806e-07	0.380795	1	1	0.0107903	C2	CASP4
1.89056e-07	0.362432	1	1	0.0110384	C2	TMEM119
1.89056e-07	0.360234	1	1	0.0110384	C2	AFAP1L1
1.934e-07	0.4931	1	1	0.0112921	C2	C5AR1
1.934e-07	0.392415	1	1	0.0112921	C2	C10orf10
1.97793e-07	0.371064	1	0.964	0.0115485	C2	SIX1
1.97841e-07	0.438775	1	1	0.0115513	C2	HMOX1
1.97841e-07	0.415734	1	1	0.0115513	C2	IQGAP2
1.97841e-07	0.363877	1	1	0.0115513	C2	LY96
1.97841e-07	0.305709	1	1	0.0115513	C2	KCNK6
2.0238e-07	0.341289	1	1	0.0118164	C2	FAM124B
2.07019e-07	0.265602	1	1	0.0120872	C2	ATL3
2.07019e-07	0.253015	1	0.991	0.0120872	C2	ADRA1D
2.11762e-07	0.440708	1	1	0.0123641	C2	RARRES2
2.11762e-07	0.31377	1	1	0.0123641	C2	AGTRAP
2.16609e-07	0.899661	1	0.991	0.0126472	C2	FOSL1
2.26627e-07	0.522223	1	1	0.0132321	C2	LDLRAD2
2.31803e-07	0.591242	1	1	0.0135343	C2	MEDAG
2.31803e-07	0.408736	1	1	0.0135343	C2	SP100
2.31803e-07	0.322452	1	1	0.0135343	C2	PEAR1
2.31803e-07	0.310995	1	1	0.0135343	C2	SELM
2.42499e-07	0.263322	1	1	0.0141588	C2	HMG20B
2.5367e-07	0.360654	1	1	0.0148111	C2	SHE
2.5367e-07	0.261947	1	1	0.0148111	C2	IL6ST
2.59441e-07	0.652734	1	0.991	0.015148	C2	BHMT2
2.59441e-07	0.36664	1	1	0.015148	C2	ACSF2
2.59441e-07	0.289911	1	1	0.015148	C2	GLIPR1
2.65339e-07	0.486623	1	1	0.0154923	C2	SUSD2
2.65339e-07	0.326082	1	1	0.0154923	C2	C19orf35
2.71366e-07	0.325201	1	1	0.0158442	C2	SCUBE2
2.77525e-07	0.910258	1	0.991	0.0162038	C2	OMD
2.77525e-07	0.390094	1	1	0.0162038	C2	PTPRE
2.77525e-07	0.33032	1	1	0.0162038	C2	VEGFC
2.83818e-07	0.46744	1	1	0.0165713	C2	PLA2G4A
2.83818e-07	0.348501	1	1	0.0165713	C2	DACT1
2.9025e-07	0.967257	1	1	0.0169468	C2	APOD
2.9025e-07	0.324301	1	1	0.0169468	C2	TSPAN15
2.9025e-07	0.300071	1	1	0.0169468	C2	PLD1
2.9025e-07	0.287895	1	1	0.0169468	C2	UTRN
2.96822e-07	0.430301	1	1	0.0173306	C2	EVC
2.96822e-07	0.408726	1	1	0.0173306	C2	DOCK6
3.17413e-07	0.549286	1	1	0.0185328	C2	EPHA3
3.17413e-07	0.47516	1	1	0.0185328	C2	PAPPA
3.17413e-07	0.461714	1	1	0.0185328	C2	FBN2
3.17413e-07	0.42047	1	1	0.0185328	C2	HHEX
3.17413e-07	0.390218	1	1	0.0185328	C2	TGFBR2
3.17413e-07	0.352268	1	1	0.0185328	C2	LXN
3.17413e-07	0.335459	1	1	0.0185328	C2	CYYR1
3.31899e-07	0.430586	1	1	0.0193786	C2	NGF
3.31899e-07	0.400436	1	1	0.0193786	C2	FILIP1
3.39379e-07	0.378381	1	1	0.0198153	C2	KCTD11
3.39379e-07	0.368849	1	1	0.0198153	C2	RAB7B
3.39379e-07	0.361651	1	0.991	0.0198153	C2	C1QTNF7
3.47022e-07	0.581385	1	1	0.0202616	C2	PRELP
3.47022e-07	0.332215	1	1	0.0202616	C2	MAN1A1
3.5483e-07	0.284903	1	1	0.0207175	C2	RGL1
3.62809e-07	0.698499	1	1	0.0211833	C2	SLC11A1
3.62809e-07	0.424866	1	1	0.0211833	C2	PLOD2
3.62809e-07	0.298956	1	1	0.0211833	C2	GALNT18
3.79288e-07	0.323087	1	1	0.0221455	C2	NR3C1
3.87796e-07	0.337382	1	1	0.0226423	C2	GRASP
3.96489e-07	0.706136	1	1	0.0231498	C2	CXCL2
4.05369e-07	0.472201	1	1	0.0236683	C2	POSTN
4.14441e-07	0.650347	1	1	0.0241979	C2	EGR3
4.14441e-07	0.356264	1	1	0.0241979	C2	GIPC2
4.14441e-07	0.315207	1	1	0.0241979	C2	LAMB3
4.14441e-07	0.31005	1	1	0.0241979	C2	LMO2
4.23708e-07	0.31143	1	1	0.0247391	C2	FAM43A
4.33176e-07	0.351387	1	1	0.0252918	C2	IL17RC
4.42847e-07	0.414279	1	1	0.0258565	C2	CPM
4.42847e-07	0.411886	1	1	0.0258565	C2	PRDM1
4.42847e-07	0.379131	1	1	0.0258565	C2	BMP4
4.52726e-07	0.378582	1	1	0.0264333	C2	APOL1
4.62818e-07	0.582894	1	1	0.0270226	C2	MAP3K8
4.62818e-07	0.33425	1	1	0.0270226	C2	EHD4
4.83657e-07	0.366782	1	1	0.0282393	C2	SLFN12
4.94413e-07	0.343915	1	1	0.0288673	C2	ADAMTS2
4.94413e-07	0.282187	1	1	0.0288673	C2	DSE
5.05399e-07	0.586041	1	1	0.0295087	C2	ANPEP
5.14683e-07	0.457657	1	0.91	0.0300508	C2	CLDN14
5.16621e-07	0.599803	1	0.991	0.0301639	C2	CH25H
5.16621e-07	0.421212	1	1	0.0301639	C2	PTGS1
5.28082e-07	0.487179	1	1	0.0308331	C2	SLC2A3
5.39789e-07	0.416323	1	1	0.0315167	C2	DHRS3
5.39789e-07	0.388453	1	1	0.0315167	C2	PPP1R13L
5.51746e-07	0.368674	1	1	0.0322148	C2	IRAK2
5.51746e-07	0.298186	1	1	0.0322148	C2	LILRA2
5.63958e-07	0.554671	1	1	0.0329278	C2	IGFBP6
5.63958e-07	0.405128	1	1	0.0329278	C2	JPH2
5.63958e-07	0.287238	1	1	0.0329278	C2	KIAA1671
5.63958e-07	0.255629	1	1	0.0329278	C2	EFNA4
5.76378e-07	0.650832	1	0.973	0.033653	C2	TNFSF9
5.76417e-07	0.284162	1	0.982	0.0336552	C2	DDIT4L
5.7643e-07	0.266043	1	1	0.033656	C2	GEM
5.89168e-07	0.563488	1	1	0.0343997	C2	TIMP3
5.89168e-07	0.300341	1	1	0.0343997	C2	BLVRB
6.02177e-07	0.54833	1	1	0.0351593	C2	MAFF
6.02177e-07	0.333714	1	1	0.0351593	C2	C19orf66
6.02177e-07	0.326371	1	1	0.0351593	C2	PAPSS2
6.02177e-07	0.277257	1	1	0.0351593	C2	GJA4
6.02177e-07	0.263502	1	1	0.0351593	C2	PECAM1
6.15462e-07	0.356606	1	1	0.035935	C2	PIEZO1
6.2903e-07	0.718296	1	0.991	0.0367272	C2	MT1M
6.2903e-07	0.518672	1	1	0.0367272	C2	FCGR1A
6.42886e-07	0.322479	1	1	0.0375362	C2	PDLIM4
6.69782e-07	0.32976	0.875	0.757	0.0391066	C2	DLX2
7.0131e-07	0.377017	1	1	0.0409474	C2	NR3C2
7.0131e-07	0.307128	1	1	0.0409474	C2	PPARG
7.16696e-07	0.496538	1	1	0.0418458	C2	EFEMP1
7.16696e-07	0.320079	1	1	0.0418458	C2	HIC1
7.32408e-07	0.501136	1	0.991	0.0427631	C2	FHL5
7.32408e-07	0.350429	1	1	0.0427631	C2	TIE1
7.48451e-07	0.295654	1	1	0.0436998	C2	MARCH3
7.64833e-07	0.353045	1	1	0.0446563	C2	FAM84B
7.64833e-07	0.311473	1	0.991	0.0446563	C2	SGCA
7.98638e-07	0.362305	1	1	0.0466301	C2	LIMS2
8.33879e-07	0.443652	1	1	0.0486877	C2	SSC5D
8.33879e-07	0.369374	1	1	0.0486877	C2	TGFB2
8.33879e-07	0.356687	1	1	0.0486877	C2	GPC6
8.33879e-07	0.30696	1	1	0.0486877	C2	ID1
8.52039e-07	0.73956	1	0.982	0.049748	C2	FXYD1
8.70617e-07	0.375735	1	1	0.0508327	C2	SH3TC1
8.89565e-07	0.494793	1	1	0.051939	C2	MGST1
8.89565e-07	0.349169	1	1	0.051939	C2	FAS
9.0891e-07	0.453299	1	0.991	0.0530685	C2	XPNPEP2
9.0891e-07	0.359825	1	1	0.0530685	C2	ARHGEF15
9.0891e-07	0.28302	1	1	0.0530685	C2	TMEM117
9.28659e-07	0.606343	1	1	0.0542216	C2	PLAUR
9.28659e-07	0.45094	1	1	0.0542216	C2	CD163
9.28659e-07	0.361363	1	1	0.0542216	C2	ROR1
9.28659e-07	0.355042	1	1	0.0542216	C2	ITPKB
9.28659e-07	0.340236	1	1	0.0542216	C2	HOPX
9.28659e-07	0.266426	1	1	0.0542216	C2	CCDC159
9.48739e-07	0.568209	0.975	0.982	0.0553941	C2	TWIST2
9.48801e-07	0.999496	1	0.982	0.0553977	C2	IL6
9.48822e-07	0.716958	1	1	0.0553989	C2	F13A1
9.69406e-07	0.585203	1	1	0.0566007	C2	EBF2
9.90419e-07	0.308639	1	1	0.0578276	C2	MAST4
1.03375e-06	0.312666	1	0.982	0.0603573	C2	DMGDH
1.03377e-06	0.456467	1	1	0.0603586	C2	ADORA3
1.05612e-06	0.331307	1	1	0.0616638	C2	SLC25A43
1.05612e-06	0.310654	1	1	0.0616638	C2	ERRFI1
1.05612e-06	0.285384	1	1	0.0616638	C2	EDA
1.07894e-06	0.478985	1	1	0.0629961	C2	ADAMTSL3
1.07894e-06	0.418761	1	1	0.0629961	C2	IFIT2
1.10223e-06	0.339155	1	1	0.0643561	C2	DRAM1
1.10223e-06	0.315346	1	1	0.0643561	C2	RBPMS2
1.10223e-06	0.267315	1	1	0.0643561	C2	SAMD4A
1.17505e-06	0.464612	1	1	0.0686078	C2	BAMBI
1.17505e-06	0.447092	1	1	0.0686078	C2	EDIL3
1.20034e-06	0.375098	1	1	0.0700841	C2	C1QTNF1
1.22615e-06	0.651093	1	1	0.071591	C2	TNXB
1.22615e-06	0.498594	1	1	0.071591	C2	FZD2
1.22615e-06	0.476112	1	1	0.071591	C2	GULP1
[truncated: 1,182 more rows]
