# Supplementary material for: Immune microenvironment heterogeneity reveals distinct subtypes in neuroblastoma: insights into prognosis and therapeutic targets
Source: Aging (Albany NY). 2023 Nov 27;15(22):13345–67. doi: 10.18632/aging.205246 (PMC10713432; doi:10.18632/aging.205246)
Supplement: Supplementary Table 7 [file aging-15-205246-s007.xlsx]

## Sheet: Sheet 1
Supplementary Table 7. Gene ontology analysis results of Fges-derived subtypes.
ID	Description	GeneRatio	BgRatio	pvalue	p.adjust	qvalue	geneID	Count
GO:0050851	antigen receptor-mediated signaling pathway	50/150	252/18903	7.09518e-57	7.5067e-54	5.28777e-54	CD3E/CD3D/UBASH3A/TRBC2/SKAP1/CD8B/LCK/SH2D1A/ZAP70/FCRL3/CD3G/TRAC/CD247/ITK/CCR7/TRDC/PTPRC/CD79A/CD19/IGHM/CD22/IGHV3-74/IGHV1-24/IGHV3-33/MS4A1/IGHG1/IGHV4-34/IGKC/IGHV3-30/IGHD/CD79B/IGLL5/IGHV3-53/IGHV3-73/IGHV3-23/IGHV4-39/IGHV5-51/IGHV4-59/IGHV3-49/IGHV4-31/IGHV2-26/IGHV3-11/IGHV1-18/IGHV1-69-2/IGHV3-21/IGHV3-15/IGHV1-69/IGHG3/IGHV3-48/IGHG4	50
GO:0002429	immune response-activating cell surface receptor signaling pathway	51/150	312/18903	1.80345e-53	6.36016e-51	4.48014e-51	CD3E/CD3D/UBASH3A/TRBC2/SKAP1/CD8B/LCK/SH2D1A/ZAP70/FCRL3/CD3G/TRAC/CD247/ITK/CCR7/TRDC/PTPRC/CD79A/CD19/IGHM/CR2/CD22/IGHV3-74/IGHV1-24/IGHV3-33/MS4A1/IGHG1/IGHV4-34/IGKC/IGHV3-30/IGHD/CD79B/IGLL5/IGHV3-53/IGHV3-73/IGHV3-23/IGHV4-39/IGHV5-51/IGHV4-59/IGHV3-49/IGHV4-31/IGHV2-26/IGHV3-11/IGHV1-18/IGHV1-69-2/IGHV3-21/IGHV3-15/IGHV1-69/IGHG3/IGHV3-48/IGHG4	51
GO:0002757	immune response-activating signal transduction	51/150	312/18903	1.80345e-53	6.36016e-51	4.48014e-51	CD3E/CD3D/UBASH3A/TRBC2/SKAP1/CD8B/LCK/SH2D1A/ZAP70/FCRL3/CD3G/TRAC/CD247/ITK/CCR7/TRDC/PTPRC/CD79A/CD19/IGHM/CR2/CD22/IGHV3-74/IGHV1-24/IGHV3-33/MS4A1/IGHG1/IGHV4-34/IGKC/IGHV3-30/IGHD/CD79B/IGLL5/IGHV3-53/IGHV3-73/IGHV3-23/IGHV4-39/IGHV5-51/IGHV4-59/IGHV3-49/IGHV4-31/IGHV2-26/IGHV3-11/IGHV1-18/IGHV1-69-2/IGHV3-21/IGHV3-15/IGHV1-69/IGHG3/IGHV3-48/IGHG4	51
GO:0050853	B cell receptor signaling pathway	39/150	130/18903	7.67782e-52	2.03078e-49	1.4305e-49	TRBC2/LCK/FCRL3/ITK/TRDC/PTPRC/CD79A/CD19/IGHM/CD22/IGHV3-74/IGHV1-24/IGHV3-33/MS4A1/IGHG1/IGHV4-34/IGKC/IGHV3-30/IGHD/CD79B/IGLL5/IGHV3-53/IGHV3-73/IGHV3-23/IGHV4-39/IGHV5-51/IGHV4-59/IGHV3-49/IGHV4-31/IGHV2-26/IGHV3-11/IGHV1-18/IGHV1-69-2/IGHV3-21/IGHV3-15/IGHV1-69/IGHG3/IGHV3-48/IGHG4	39
GO:0002768	immune response-regulating cell surface receptor signaling pathway	51/150	341/18903	2.12494e-51	4.49637e-49	3.16728e-49	CD3E/CD3D/UBASH3A/TRBC2/SKAP1/CD8B/LCK/SH2D1A/ZAP70/FCRL3/CD3G/TRAC/CD247/ITK/CCR7/TRDC/PTPRC/CD79A/CD19/IGHM/CR2/CD22/IGHV3-74/IGHV1-24/IGHV3-33/MS4A1/IGHG1/IGHV4-34/IGKC/IGHV3-30/IGHD/CD79B/IGLL5/IGHV3-53/IGHV3-73/IGHV3-23/IGHV4-39/IGHV5-51/IGHV4-59/IGHV3-49/IGHV4-31/IGHV2-26/IGHV3-11/IGHV1-18/IGHV1-69-2/IGHV3-21/IGHV3-15/IGHV1-69/IGHG3/IGHV3-48/IGHG4	51
GO:0002253	activation of immune response	51/150	397/18903	6.60831e-48	1.16527e-45	8.20822e-46	CD3E/CD3D/UBASH3A/TRBC2/SKAP1/CD8B/LCK/SH2D1A/ZAP70/FCRL3/CD3G/TRAC/CD247/ITK/CCR7/TRDC/PTPRC/CD79A/CD19/IGHM/CR2/CD22/IGHV3-74/IGHV1-24/IGHV3-33/MS4A1/IGHG1/IGHV4-34/IGKC/IGHV3-30/IGHD/CD79B/IGLL5/IGHV3-53/IGHV3-73/IGHV3-23/IGHV4-39/IGHV5-51/IGHV4-59/IGHV3-49/IGHV4-31/IGHV2-26/IGHV3-11/IGHV1-18/IGHV1-69-2/IGHV3-21/IGHV3-15/IGHV1-69/IGHG3/IGHV3-48/IGHG4	51
GO:0042113	B cell activation	47/150	350/18903	6.78359e-45	1.02529e-42	7.22222e-43	TBC1D10C/TRBC2/IL2RG/ZAP70/IKZF3/FCRL3/CD27/TRDC/PTPRC/POU2AF1/IL7R/MZB1/CD79A/CD19/IGHM/FCRL1/CR2/CD22/IGHV3-74/IGHV1-24/IGHV3-33/MS4A1/IGHG1/IGHV4-34/IGKC/IGHV3-30/IGHD/CD79B/IGLL5/IGHV3-53/IGHV3-73/IGHV3-23/IGHV4-39/IGHV5-51/IGHV4-59/IGHV3-49/IGHV4-31/IGHV2-26/IGHV3-11/IGHV1-18/IGHV1-69-2/IGHV3-21/IGHV3-15/IGHV1-69/IGHG3/IGHV3-48/IGHG4	47
GO:0050864	regulation of B cell activation	39/150	204/18903	2.55694e-43	3.38155e-41	2.38199e-41	TBC1D10C/TRBC2/IL2RG/IKZF3/FCRL3/CD27/TRDC/PTPRC/MZB1/CD19/IGHM/CD22/IGHV3-74/IGHV1-24/IGHV3-33/IGHG1/IGHV4-34/IGKC/IGHV3-30/IGHD/IGLL5/IGHV3-53/IGHV3-73/IGHV3-23/IGHV4-39/IGHV5-51/IGHV4-59/IGHV3-49/IGHV4-31/IGHV2-26/IGHV3-11/IGHV1-18/IGHV1-69-2/IGHV3-21/IGHV3-15/IGHV1-69/IGHG3/IGHV3-48/IGHG4	39
GO:0002455	humoral immune response mediated by circulating immunoglobulin	33/150	119/18903	1.7461e-42	2.05263e-40	1.44589e-40	TRBC2/TRDC/PTPRC/IGHM/CR2/FCER2/IGHV3-74/IGHV1-24/IGHV3-33/IGHG1/IGHV4-34/IGKC/IGHV3-30/IGHD/IGLL5/IGHV3-53/IGHV3-73/IGHV3-23/IGHV4-39/IGHV5-51/IGHV4-59/IGHV3-49/IGHV4-31/IGHV2-26/IGHV3-11/IGHV1-18/IGHV1-69-2/IGHV3-21/IGHV3-15/IGHV1-69/IGHG3/IGHV3-48/IGHG4	33
GO:0006958	complement activation, classical pathway	31/150	106/18903	9.96916e-41	1.05474e-38	7.42965e-39	TRBC2/TRDC/IGHM/CR2/IGHV3-74/IGHV1-24/IGHV3-33/IGHG1/IGHV4-34/IGKC/IGHV3-30/IGHD/IGLL5/IGHV3-53/IGHV3-73/IGHV3-23/IGHV4-39/IGHV5-51/IGHV4-59/IGHV3-49/IGHV4-31/IGHV2-26/IGHV3-11/IGHV1-18/IGHV1-69-2/IGHV3-21/IGHV3-15/IGHV1-69/IGHG3/IGHV3-48/IGHG4	31
GO:0050871	positive regulation of B cell activation	34/150	155/18903	6.659e-40	6.40475e-38	4.51155e-38	TRBC2/IL2RG/FCRL3/CD27/TRDC/PTPRC/IGHM/IGHV3-74/IGHV1-24/IGHV3-33/IGHG1/IGHV4-34/IGKC/IGHV3-30/IGHD/IGLL5/IGHV3-53/IGHV3-73/IGHV3-23/IGHV4-39/IGHV5-51/IGHV4-59/IGHV3-49/IGHV4-31/IGHV2-26/IGHV3-11/IGHV1-18/IGHV1-69-2/IGHV3-21/IGHV3-15/IGHV1-69/IGHG3/IGHV3-48/IGHG4	34
GO:0006910	phagocytosis, recognition	30/150	103/18903	2.3516e-39	2.07333e-37	1.46047e-37	TRBC2/TRDC/IGHM/IGHV3-74/IGHV1-24/IGHV3-33/IGHG1/IGHV4-34/IGKC/IGHV3-30/IGHD/IGLL5/IGHV3-53/IGHV3-73/IGHV3-23/IGHV4-39/IGHV5-51/IGHV4-59/IGHV3-49/IGHV4-31/IGHV2-26/IGHV3-11/IGHV1-18/IGHV1-69-2/IGHV3-21/IGHV3-15/IGHV1-69/IGHG3/IGHV3-48/IGHG4	30
GO:0002377	immunoglobulin production	37/150	219/18903	6.0883e-39	4.95494e-37	3.4903e-37	FCRL3/PTPRC/TRDV1/MZB1/VPREB3/CD22/IGLV2-14/IGKV4-1/IGLV2-23/IGKV1-5/IGLV1-40/IGKV3-20/IGKV1-9/IGKV1-17/IGLV1-44/IGKV1-8/IGLV3-27/IGLV2-11/IGLV3-19/IGLV9-49/IGKV1-27/IGKV2-30/IGLV7-46/IGLV3-21/IGLV4-69/IGKV3-15/IGLV1-47/IGKV1-16/IGKV2-24/IGKV1-6/IGLV3-10/IGLV6-57/IGLV8-61/IGLV3-1/IGLV3-25/IGLV4-60/IGKV2D-29	37
GO:0051251	positive regulation of lymphocyte activation	44/150	400/18903	4.92014e-38	3.71822e-36	2.61914e-36	SIRPG/CD3E/CD5/TRBC2/IL2RG/LCK/CD6/ZAP70/FCRL3/CD27/CCR7/TRDC/PTPRC/CCL19/IL7R/IGHM/IGHV3-74/IGHV1-24/IGHV3-33/IGHG1/IGHV4-34/IGKC/IGHV3-30/IGHD/IGLL5/IGHV3-53/IGHV3-73/IGHV3-23/IGHV4-39/IGHV5-51/IGHV4-59/IGHV3-49/IGHV4-31/CCL21/IGHV2-26/IGHV3-11/IGHV1-18/IGHV1-69-2/IGHV3-21/IGHV3-15/IGHV1-69/IGHG3/IGHV3-48/IGHG4	44
GO:0050867	positive regulation of cell activation	46/150	467/18903	1.25911e-37	8.88091e-36	6.25578e-36	CD2/SIRPG/CD3E/CD5/TRBC2/IL2RG/LCK/CD6/ZAP70/FCRL3/CD27/CCR7/TRDC/PTPRC/CCL19/IL7R/GP1BA/IGHM/IGHV3-74/IGHV1-24/IGHV3-33/IGHG1/IGHV4-34/IGKC/IGHV3-30/IGHD/IGLL5/IGHV3-53/IGHV3-73/IGHV3-23/IGHV4-39/IGHV5-51/IGHV4-59/IGHV3-49/IGHV4-31/CCL21/IGHV2-26/IGHV3-11/IGHV1-18/IGHV1-69-2/IGHV3-21/IGHV3-15/IGHV1-69/IGHG3/IGHV3-48/IGHG4	46
GO:0006956	complement activation	31/150	132/18903	2.18137e-37	1.44243e-35	1.01606e-35	TRBC2/TRDC/IGHM/CR2/IGHV3-74/IGHV1-24/IGHV3-33/IGHG1/IGHV4-34/IGKC/IGHV3-30/IGHD/IGLL5/IGHV3-53/IGHV3-73/IGHV3-23/IGHV4-39/IGHV5-51/IGHV4-59/IGHV3-49/IGHV4-31/IGHV2-26/IGHV3-11/IGHV1-18/IGHV1-69-2/IGHV3-21/IGHV3-15/IGHV1-69/IGHG3/IGHV3-48/IGHG4	31
GO:0002696	positive regulation of leukocyte activation	45/150	450/18903	4.5664e-37	2.84191e-35	2.00186e-35	CD2/SIRPG/CD3E/CD5/TRBC2/IL2RG/LCK/CD6/ZAP70/FCRL3/CD27/CCR7/TRDC/PTPRC/CCL19/IL7R/IGHM/IGHV3-74/IGHV1-24/IGHV3-33/IGHG1/IGHV4-34/IGKC/IGHV3-30/IGHD/IGLL5/IGHV3-53/IGHV3-73/IGHV3-23/IGHV4-39/IGHV5-51/IGHV4-59/IGHV3-49/IGHV4-31/CCL21/IGHV2-26/IGHV3-11/IGHV1-18/IGHV1-69-2/IGHV3-21/IGHV3-15/IGHV1-69/IGHG3/IGHV3-48/IGHG4	45
GO:0006959	humoral immune response	40/150	320/18903	1.00797e-36	5.92464e-35	4.17336e-35	TRBC2/SH2D1A/CCR7/TRDC/PTPRC/POU2AF1/IGHM/CR2/FCER2/IGHV3-74/IGHV1-24/IGHV3-33/MS4A1/IGHG1/IGHV4-34/CXCL9/IGKC/IGHV3-30/IGKV3-20/IGHD/IGLL5/IGHV3-53/IGHV3-73/IGHV3-23/IGHV4-39/IGHV5-51/IGHV4-59/IGHV3-49/IGHV4-31/IGHV2-26/IGHV3-11/IGHV1-18/IGHV1-69-2/IGHV3-21/IGHV3-15/IGHV1-69/IGHG3/CXCL13/IGHV3-48/IGHG4	40
GO:0008037	cell recognition	36/150	230/18903	1.28064e-36	7.13112e-35	5.02321e-35	CD5/TRBC2/CD6/CCR7/TRDC/CCL19/IGHM/IGHV3-74/IGHV1-24/IGHV3-33/IGHG1/IGHV4-34/IGKC/IGHV3-30/IGHD/IGLL5/IGHV3-53/IGHV3-73/IGHV3-23/IGHV4-39/IGHV5-51/IGHV4-59/IGHV3-49/IGHV4-31/CCL21/IGHV2-26/IGHV3-11/IGHV1-18/IGHV1-69-2/IGHV3-21/IGHV3-15/IGHV1-69/IGHG3/IGHV3-48/IGHG4/CLEC4M	36
GO:0006911	phagocytosis, engulfment	30/150	127/18903	2.86516e-36	1.51567e-34	1.06765e-34	TRBC2/TRDC/IGHM/IGHV3-74/IGHV1-24/IGHV3-33/IGHG1/IGHV4-34/IGKC/IGHV3-30/IGHD/IGLL5/IGHV3-53/IGHV3-73/IGHV3-23/IGHV4-39/IGHV5-51/IGHV4-59/IGHV3-49/IGHV4-31/IGHV2-26/IGHV3-11/IGHV1-18/IGHV1-69-2/IGHV3-21/IGHV3-15/IGHV1-69/IGHG3/IGHV3-48/IGHG4	30
GO:0016064	immunoglobulin mediated immune response	35/150	215/18903	3.22489e-36	1.62473e-34	1.14447e-34	TRBC2/CD27/TRDC/PTPRC/CD19/IGHM/CR2/FCER2/IGHV3-74/IGHV1-24/IGHV3-33/IGHG1/IGHV4-34/IGKC/IGHV3-30/IGHD/IGLL5/IGHV3-53/IGHV3-73/IGHV3-23/IGHV4-39/IGHV5-51/IGHV4-59/IGHV3-49/IGHV4-31/IGHV2-26/IGHV3-11/IGHV1-18/IGHV1-69-2/IGHV3-21/IGHV3-15/IGHV1-69/IGHG3/IGHV3-48/IGHG4	35
GO:0019724	B cell mediated immunity	35/150	218/18903	5.36876e-36	2.58189e-34	1.8187e-34	TRBC2/CD27/TRDC/PTPRC/CD19/IGHM/CR2/FCER2/IGHV3-74/IGHV1-24/IGHV3-33/IGHG1/IGHV4-34/IGKC/IGHV3-30/IGHD/IGLL5/IGHV3-53/IGHV3-73/IGHV3-23/IGHV4-39/IGHV5-51/IGHV4-59/IGHV3-49/IGHV4-31/IGHV2-26/IGHV3-11/IGHV1-18/IGHV1-69-2/IGHV3-21/IGHV3-15/IGHV1-69/IGHG3/IGHV3-48/IGHG4	35
GO:0099024	plasma membrane invagination	30/150	136/18903	2.76174e-35	1.2704e-33	8.9488e-34	TRBC2/TRDC/IGHM/IGHV3-74/IGHV1-24/IGHV3-33/IGHG1/IGHV4-34/IGKC/IGHV3-30/IGHD/IGLL5/IGHV3-53/IGHV3-73/IGHV3-23/IGHV4-39/IGHV5-51/IGHV4-59/IGHV3-49/IGHV4-31/IGHV2-26/IGHV3-11/IGHV1-18/IGHV1-69-2/IGHV3-21/IGHV3-15/IGHV1-69/IGHG3/IGHV3-48/IGHG4	30
GO:0010324	membrane invagination	30/150	143/18903	1.43109e-34	6.30872e-33	4.44391e-33	TRBC2/TRDC/IGHM/IGHV3-74/IGHV1-24/IGHV3-33/IGHG1/IGHV4-34/IGKC/IGHV3-30/IGHD/IGLL5/IGHV3-53/IGHV3-73/IGHV3-23/IGHV4-39/IGHV5-51/IGHV4-59/IGHV3-49/IGHV4-31/IGHV2-26/IGHV3-11/IGHV1-18/IGHV1-69-2/IGHV3-21/IGHV3-15/IGHV1-69/IGHG3/IGHV3-48/IGHG4	30
GO:0002449	lymphocyte mediated immunity	40/150	367/18903	2.58769e-34	1.09511e-32	7.71405e-33	CD2/TRBC2/CD96/SLAMF6/SH2D1A/CD27/TRDC/PTPRC/IL7R/CD19/IGHM/CR2/FCER2/IGHV3-74/IGHV1-24/IGHV3-33/IGHG1/IGHV4-34/IGKC/IGHV3-30/IGHD/IGLL5/IGHV3-53/IGHV3-73/IGHV3-23/IGHV4-39/IGHV5-51/IGHV4-59/IGHV3-49/IGHV4-31/IGHV2-26/IGHV3-11/IGHV1-18/IGHV1-69-2/IGHV3-21/IGHV3-15/IGHV1-69/IGHG3/IGHV3-48/IGHG4	40
GO:0002460	adaptive immune response based on somatic recombination of immune receptors built from immunoglobulin superfamily domains	40/150	375/18903	6.14593e-34	2.50092e-32	1.76167e-32	TRBC2/SLAMF6/SPN/CD27/TRDC/PTPRC/CCL19/IL7R/CD19/IGHM/CR2/FCER2/IGHV3-74/IGHV1-24/IGHV3-33/IGHG1/IGHV4-34/IGKC/IGHV3-30/IGHD/IGLL5/IGHV3-53/IGHV3-73/IGHV3-23/IGHV4-39/IGHV5-51/IGHV4-59/IGHV3-49/IGHV4-31/IGHV2-26/IGHV3-11/IGHV1-18/IGHV1-69-2/IGHV3-21/IGHV3-15/IGHV1-69/IGHG3/CXCL13/IGHV3-48/IGHG4	40
GO:0002440	production of molecular mediator of immune response	38/150	333/18903	2.52293e-33	9.88615e-32	6.96388e-32	CD96/FCRL3/PTPRC/TRDV1/MZB1/VPREB3/CD22/IGLV2-14/IGKV4-1/IGLV2-23/IGKV1-5/IGLV1-40/IGKV3-20/IGKV1-9/IGKV1-17/IGLV1-44/IGKV1-8/IGLV3-27/IGLV2-11/IGLV3-19/IGLV9-49/IGKV1-27/IGKV2-30/IGLV7-46/IGLV3-21/IGLV4-69/IGKV3-15/IGLV1-47/IGKV1-16/IGKV2-24/IGKV1-6/IGLV3-10/IGLV6-57/IGLV8-61/IGLV3-1/IGLV3-25/IGLV4-60/IGKV2D-29	38
GO:0002443	leukocyte mediated immunity	40/150	463/18903	2.58178e-30	9.75544e-29	6.87181e-29	CD2/TRBC2/CD96/SLAMF6/SH2D1A/CD27/TRDC/PTPRC/IL7R/CD19/IGHM/CR2/FCER2/IGHV3-74/IGHV1-24/IGHV3-33/IGHG1/IGHV4-34/IGKC/IGHV3-30/IGHD/IGLL5/IGHV3-53/IGHV3-73/IGHV3-23/IGHV4-39/IGHV5-51/IGHV4-59/IGHV3-49/IGHV4-31/IGHV2-26/IGHV3-11/IGHV1-18/IGHV1-69-2/IGHV3-21/IGHV3-15/IGHV1-69/IGHG3/IGHV3-48/IGHG4	40
GO:0006909	phagocytosis	34/150	314/18903	5.30084e-29	1.93389e-27	1.36225e-27	SIRPG/TRBC2/ITGAL/IL2RG/TRDC/PTPRC/IGHM/IGHV3-74/IGHV1-24/IGHV3-33/IGHG1/IGHV4-34/IGKC/IGHV3-30/IGHD/IGLL5/IGHV3-53/IGHV3-73/IGHV3-23/IGHV4-39/IGHV5-51/IGHV4-59/IGHV3-49/IGHV4-31/IGHV2-26/IGHV3-11/IGHV1-18/IGHV1-69-2/IGHV3-21/IGHV3-15/IGHV1-69/IGHG3/IGHV3-48/IGHG4	34
GO:0042742	defense response to bacterium	34/150	382/18903	3.86516e-26	1.36311e-24	9.60186e-25	TRBC2/SPN/TRDC/IL7R/IGHM/IGHV3-74/IGHV1-24/IGHV3-33/IGHG1/IGHV4-34/IGKC/IGHV3-30/IGKV3-20/IGHD/IGLL5/IGHV3-53/IGHV3-73/IGHV3-23/IGHV4-39/IGHV5-51/IGHV4-59/IGHV3-49/IGHV4-31/IGHV2-26/IGHV3-11/IGHV1-18/IGHV1-69-2/IGHV3-21/IGHV3-15/IGHV1-69/IGHG3/CXCL13/IGHV3-48/IGHG4	34
GO:0050852	T cell receptor signaling pathway	16/150	139/18903	1.79937e-14	6.14106e-13	4.32581e-13	CD3E/CD3D/UBASH3A/TRBC2/SKAP1/CD8B/LCK/SH2D1A/ZAP70/CD3G/TRAC/CD247/ITK/CCR7/TRDC/PTPRC	16
GO:0030098	lymphocyte differentiation	24/150	419/18903	3.08176e-14	1.01891e-12	7.17725e-13	CD2/CD3E/CD3D/IL2RG/LCK/SLAMF6/ZAP70/SPN/IKZF3/FCRL3/CD3G/ITK/CD27/CCR7/PTPRC/CCL19/POU2AF1/IL7R/CD79A/CD19/CR2/PLA2G2D/MS4A1/CD79B	24
GO:1903131	mononuclear cell differentiation	25/150	473/18903	5.27373e-14	1.69079e-12	1.19101e-12	CD2/CD3E/CD3D/IL2RG/LCK/SLAMF6/ZAP70/SPN/IKZF3/FCRL3/CD3G/ITK/CD27/CCR7/PTPRC/CCL19/POU2AF1/IL7R/CD79A/CD19/CR2/PLA2G2D/MS4A1/UBD/CD79B	25
GO:0007159	leukocyte cell-cell adhesion	21/150	414/18903	1.43823e-11	4.47544e-10	3.15254e-10	SIRPG/CD3E/CD5/ITGAL/SKAP1/IL2RG/LCK/CD6/ZAP70/SPN/CD27/CCR7/IDO1/PTPRC/CCL19/IL7R/SELL/GP1BA/PLA2G2D/CCL21/CLEC4M	21
GO:0046631	alpha-beta T cell activation	14/150	174/18903	1.1195e-10	3.3841e-09	2.38379e-09	CD3E/CD3D/TRBC2/IL2RG/SLAMF6/ZAP70/SPN/CD3G/TRAC/CD247/ITK/PTPRC/CCL19/PLA2G2D	14
GO:0030217	T cell differentiation	17/150	296/18903	2.14982e-10	6.31807e-09	4.45049e-09	CD2/CD3E/CD3D/IL2RG/LCK/SLAMF6/ZAP70/SPN/IKZF3/CD3G/ITK/CD27/CCR7/PTPRC/CCL19/IL7R/PLA2G2D	17
GO:0046651	lymphocyte proliferation	17/150	305/18903	3.41482e-10	9.76454e-09	6.87821e-09	CD3E/CD6/ZAP70/SPN/IKZF3/FCRL3/IDO1/PTPRC/CCL19/IL7R/MZB1/CD79A/CD19/CR2/PLA2G2D/CD22/MS4A1	17
GO:0032943	mononuclear cell proliferation	17/150	312/18903	4.84125e-10	1.3479e-08	9.49474e-09	CD3E/CD6/ZAP70/SPN/IKZF3/FCRL3/IDO1/PTPRC/CCL19/IL7R/MZB1/CD79A/CD19/CR2/PLA2G2D/CD22/MS4A1	17
GO:0050863	regulation of T cell activation	18/150	376/18903	1.15684e-09	3.13829e-08	2.21063e-08	CD2/SIRPG/CD3E/CD5/IL2RG/LCK/CD6/ZAP70/SPN/CD27/CCR7/SIT1/IDO1/PTPRC/CCL19/IL7R/PLA2G2D/CCL21	18
GO:1903037	regulation of leukocyte cell-cell adhesion	18/150	377/18903	1.20671e-09	3.19175e-08	2.24829e-08	SIRPG/CD3E/CD5/SKAP1/IL2RG/LCK/CD6/ZAP70/SPN/CD27/CCR7/IDO1/PTPRC/CCL19/IL7R/GP1BA/PLA2G2D/CCL21	18
GO:0070661	leukocyte proliferation	17/150	348/18903	2.54816e-09	6.5755e-08	4.63183e-08	CD3E/CD6/ZAP70/SPN/IKZF3/FCRL3/IDO1/PTPRC/CCL19/IL7R/MZB1/CD79A/CD19/CR2/PLA2G2D/CD22/MS4A1	17
GO:1903039	positive regulation of leukocyte cell-cell adhesion	15/150	275/18903	5.30785e-09	1.33707e-07	9.41845e-08	SIRPG/CD3E/CD5/SKAP1/IL2RG/LCK/CD6/ZAP70/CD27/CCR7/PTPRC/CCL19/IL7R/GP1BA/CCL21	15
GO:0022409	positive regulation of cell-cell adhesion	16/150	322/18903	6.0602e-09	1.49109e-07	1.05034e-07	SIRPG/CD3E/CD5/SKAP1/IL2RG/LCK/CD6/ZAP70/CD27/CCR7/PTPRC/CCL19/IL7R/GP1BA/CCL21/CXCL13	16
GO:0045058	T cell selection	8/150	51/18903	6.21702e-09	1.49491e-07	1.05303e-07	CD3E/CD3D/SLAMF6/ZAP70/SPN/CD3G/CCR7/PTPRC	8
GO:0042100	B cell proliferation	10/150	104/18903	1.01008e-08	2.37482e-07	1.67284e-07	IKZF3/FCRL3/PTPRC/IL7R/MZB1/CD79A/CD19/CR2/CD22/MS4A1	10
GO:0022407	regulation of cell-cell adhesion	19/150	490/18903	1.23356e-08	2.83718e-07	1.99853e-07	SIRPG/CD3E/CD5/SKAP1/IL2RG/LCK/CD6/ZAP70/SPN/CD27/CCR7/IDO1/PTPRC/CCL19/IL7R/GP1BA/PLA2G2D/CCL21/CXCL13	19
GO:0045061	thymic T cell selection	6/150	22/18903	1.51722e-08	3.41536e-07	2.4058e-07	CD3E/CD3D/ZAP70/CD3G/CCR7/PTPRC	6
GO:0043368	positive T cell selection	7/150	38/18903	1.76771e-08	3.89632e-07	2.7446e-07	CD3E/CD3D/SLAMF6/ZAP70/SPN/CD3G/PTPRC	7
GO:0030183	B cell differentiation	11/150	152/18903	3.60742e-08	7.78909e-07	5.4867e-07	IL2RG/IKZF3/FCRL3/CD27/PTPRC/POU2AF1/CD79A/CD19/CR2/MS4A1/CD79B	11
GO:0046629	gamma-delta T cell activation	6/150	26/18903	4.56069e-08	9.65041e-07	6.79782e-07	CD3E/CD3G/CD247/ITK/TRDC/PTPRC	6
GO:0050854	regulation of antigen receptor-mediated signaling pathway	8/150	66/18903	5.07235e-08	1.05226e-06	7.41222e-07	UBASH3A/LCK/SH2D1A/FCRL3/CCR7/PTPRC/CD19/CD22	8
GO:0045059	positive thymic T cell selection	5/150	14/18903	5.5615e-08	1.13155e-06	7.97073e-07	CD3E/CD3D/ZAP70/CD3G/PTPRC	5
GO:0050870	positive regulation of T cell activation	13/150	251/18903	1.06779e-07	2.13156e-06	1.50149e-06	SIRPG/CD3E/CD5/IL2RG/LCK/CD6/ZAP70/CD27/CCR7/PTPRC/CCL19/IL7R/CCL21	13
GO:0033077	T cell differentiation in thymus	8/150	86/18903	4.09956e-07	8.03211e-06	5.65788e-06	CD3E/CD3D/IL2RG/ZAP70/CD3G/CCR7/PTPRC/IL7R	8
GO:0050670	regulation of lymphocyte proliferation	12/150	239/18903	4.69e-07	9.02185e-06	6.35506e-06	CD3E/CD6/ZAP70/SPN/IKZF3/FCRL3/IDO1/PTPRC/CCL19/MZB1/PLA2G2D/CD22	12
GO:0032944	regulation of mononuclear cell proliferation	12/150	243/18903	5.59691e-07	1.05742e-05	7.44852e-06	CD3E/CD6/ZAP70/SPN/IKZF3/FCRL3/IDO1/PTPRC/CCL19/MZB1/PLA2G2D/CD22	12
GO:0045060	negative thymic T cell selection	4/150	11/18903	1.20379e-06	2.23441e-05	1.57393e-05	CD3E/ZAP70/CCR7/PTPRC	4
GO:0031295	T cell costimulation	6/150	45/18903	1.42507e-06	2.59953e-05	1.83113e-05	CD3E/CD5/LCK/CCR7/CCL19/CCL21	6
GO:0045785	positive regulation of cell adhesion	16/150	484/18903	1.56486e-06	2.80614e-05	1.97666e-05	SIRPG/CD3E/CD5/SKAP1/IL2RG/LCK/CD6/ZAP70/CD27/CCR7/PTPRC/CCL19/IL7R/GP1BA/CCL21/CXCL13	16
GO:0070663	regulation of leukocyte proliferation	12/150	269/18903	1.63303e-06	2.87958e-05	2.0284e-05	CD3E/CD6/ZAP70/SPN/IKZF3/FCRL3/IDO1/PTPRC/CCL19/MZB1/PLA2G2D/CD22	12
GO:0043383	negative T cell selection	4/150	12/18903	1.79454e-06	3.1125e-05	2.19247e-05	CD3E/ZAP70/CCR7/PTPRC	4
GO:0031294	lymphocyte costimulation	6/150	47/18903	1.85429e-06	3.16426e-05	2.22893e-05	CD3E/CD5/LCK/CCR7/CCL19/CCL21	6
GO:2000107	negative regulation of leukocyte apoptotic process	6/150	55/18903	4.75164e-06	7.97975e-05	5.62099e-05	CD27/CCR7/IDO1/CCL19/IL7R/CCL21	6
GO:0001771	immunological synapse formation	4/150	15/18903	4.85758e-06	8.03019e-05	5.65653e-05	CD6/CCR7/CCL19/CCL21	4
GO:0051209	release of sequestered calcium ion into cytosol	8/150	124/18903	6.60008e-06	0.000107429	7.56738e-05	LCK/CCR7/PTPRC/CCL19/GP1BA/CD19/CXCL9/CCL21	8
GO:0051283	negative regulation of sequestering of calcium ion	8/150	125/18903	7.0045e-06	0.000112284	7.90939e-05	LCK/CCR7/PTPRC/CCL19/GP1BA/CD19/CXCL9/CCL21	8
GO:0051282	regulation of sequestering of calcium ion	8/150	127/18903	7.87644e-06	0.000124377	8.76123e-05	LCK/CCR7/PTPRC/CCL19/GP1BA/CD19/CXCL9/CCL21	8
GO:2000106	regulation of leukocyte apoptotic process	7/150	93/18903	9.22037e-06	0.000143458	0.000101053	CD3G/CD27/CCR7/IDO1/CCL19/IL7R/CCL21	7
GO:0051208	sequestering of calcium ion	8/150	131/18903	9.89761e-06	0.000151763	0.000106903	LCK/CCR7/PTPRC/CCL19/GP1BA/CD19/CXCL9/CCL21	8
GO:0097553	calcium ion transmembrane import into cytosol	9/150	182/18903	1.51006e-05	0.000228235	0.00016077	LCK/CCR7/PTPRC/CCL19/GP1BA/CD19/MS4A1/CXCL9/CCL21	9
GO:0033630	positive regulation of cell adhesion mediated by integrin	4/150	22/18903	2.49295e-05	0.000371484	0.000261676	CD3E/SKAP1/CCL21/CXCL13	4
GO:0002920	regulation of humoral immune response	5/150	46/18903	3.10351e-05	0.000456044	0.000321241	CCR7/PTPRC/CR2/FCER2/CXCL13	5
GO:0046632	alpha-beta T cell differentiation	7/150	117/18903	4.11971e-05	0.000589007	0.000414901	IL2RG/SLAMF6/ZAP70/SPN/ITK/CCL19/PLA2G2D	7
GO:0071887	leukocyte apoptotic process	7/150	117/18903	4.11971e-05	0.000589007	0.000414901	CD3G/CD27/CCR7/IDO1/CCL19/IL7R/CCL21	7
GO:0045619	regulation of lymphocyte differentiation	9/150	210/18903	4.66243e-05	0.000657714	0.000463298	CD2/IL2RG/ZAP70/IKZF3/FCRL3/CD27/PTPRC/CCL19/IL7R	9
GO:0002438	acute inflammatory response to antigenic stimulus	4/150	26/18903	4.97069e-05	0.000691972	0.00048743	CD6/CCR7/PLA2G2D/IGHG1	4
GO:0072676	lymphocyte migration	7/150	124/18903	5.97089e-05	0.000820416	0.000577907	ITGAL/ZAP70/SPN/CCR7/CCL19/CCL21/CXCL13	7
GO:0002683	negative regulation of immune system process	13/150	449/18903	6.17144e-05	0.000837101	0.00058966	TBC1D10C/UBASH3A/CD96/SH2D1A/SPN/FCRL3/IDO1/PTPRC/IL7R/CR2/PLA2G2D/CD22/CCL21	13
GO:0033627	cell adhesion mediated by integrin	6/150	88/18903	7.16513e-05	0.000959583	0.000675938	CD3E/ITGAL/SKAP1/CCL21/ITGA8/CXCL13	6
GO:0002604	regulation of dendritic cell antigen processing and presentation	3/150	11/18903	7.71256e-05	0.00100739	0.000709616	CCR7/CCL19/CCL21	3
GO:0033632	regulation of cell-cell adhesion mediated by integrin	3/150	11/18903	7.71256e-05	0.00100739	0.000709616	CD3E/SKAP1/CXCL13	3
GO:0070098	chemokine-mediated signaling pathway	6/150	90/18903	8.12557e-05	0.0010379	0.000731106	CCR7/CXCR3/CCL19/CXCL9/CCL21/CXCL13	6
GO:0050900	leukocyte migration	12/150	398/18903	8.14233e-05	0.0010379	0.000731106	ITGAL/LCK/ZAP70/SPN/CCR7/CXCR3/CCL19/SELL/GP1BA/CXCL9/CCL21/CXCL13	12
GO:0042129	regulation of T cell proliferation	8/150	182/18903	0.00010408	0.00131091	0.000923414	CD3E/CD6/ZAP70/SPN/IDO1/PTPRC/CCL19/PLA2G2D	8
GO:0043552	positive regulation of phosphatidylinositol 3-kinase activity	4/150	32/18903	0.00011522	0.00143415	0.00101023	CCR7/CCL19/CD19/CCL21	4
GO:0045577	regulation of B cell differentiation	4/150	33/18903	0.000130307	0.00151954	0.00107038	IL2RG/IKZF3/FCRL3/CD27	4
GO:0050858	negative regulation of antigen receptor-mediated signaling pathway	4/150	33/18903	0.000130307	0.00151954	0.00107038	UBASH3A/SH2D1A/FCRL3/CD22	4
GO:0050901	leukocyte tethering or rolling	4/150	33/18903	0.000130307	0.00151954	0.00107038	SPN/SELL/GP1BA/CCL21	4
GO:1990868	response to chemokine	6/150	98/18903	0.000130418	0.00151954	0.00107038	CCR7/CXCR3/CCL19/CXCL9/CCL21/CXCL13	6
GO:1990869	cellular response to chemokine	6/150	98/18903	0.000130418	0.00151954	0.00107038	CCR7/CXCR3/CCL19/CXCL9/CCL21/CXCL13	6
GO:0097048	dendritic cell apoptotic process	3/150	13/18903	0.000132134	0.00151954	0.00107038	CCR7/CCL19/CCL21	3
GO:2000668	regulation of dendritic cell apoptotic process	3/150	13/18903	0.000132134	0.00151954	0.00107038	CCR7/CCL19/CCL21	3
GO:0001819	positive regulation of cytokine production	13/150	486/18903	0.000136284	0.00155041	0.00109212	CD2/CD3E/SLAMF6/CD6/SPN/ITK/LTB/CCR7/IDO1/PTPRC/CCL19/POU2AF1/IGHD	13
GO:0090218	positive regulation of lipid kinase activity	4/150	36/18903	0.000184146	0.00207262	0.00145997	CCR7/CCL19/CD19/CCL21	4
GO:0030888	regulation of B cell proliferation	5/150	67/18903	0.000191294	0.00213041	0.00150067	IKZF3/FCRL3/PTPRC/MZB1/CD22	5
GO:0001768	establishment of T cell polarity	3/150	15/18903	0.000207777	0.00226626	0.00159637	CCR7/CCL19/CCL21	3
GO:0002468	dendritic cell antigen processing and presentation	3/150	15/18903	0.000207777	0.00226626	0.00159637	CCR7/CCL19/CCL21	3
GO:0002697	regulation of immune effector process	11/150	379/18903	0.000225507	0.00243455	0.00171492	CD96/SLAMF6/SH2D1A/FCRL3/PTPRC/CCL19/IL7R/MZB1/CR2/FCER2/CD22	11
GO:0009988	cell-cell recognition	5/150	71/18903	0.000251419	0.00268688	0.00189266	CD6/CCR7/CCL19/CCL21/CLEC4M	5
GO:0001767	establishment of lymphocyte polarity	3/150	16/18903	0.00025424	0.00268986	0.00189475	CCR7/CCL19/CCL21	3
GO:0046635	positive regulation of alpha-beta T cell activation	5/150	73/18903	0.000286387	0.00297056	0.00209249	CD3E/IL2RG/ZAP70/PTPRC/CCL19	5
GO:0072678	T cell migration	5/150	73/18903	0.000286387	0.00297056	0.00209249	ITGAL/ZAP70/SPN/CCL21/CXCL13	5
GO:0042098	T cell proliferation	8/150	212/18903	0.000295558	0.00303593	0.00213853	CD3E/CD6/ZAP70/SPN/IDO1/PTPRC/CCL19/PLA2G2D	8
GO:0045123	cellular extravasation	5/150	74/18903	0.000305196	0.00309265	0.00217849	ITGAL/SPN/SELL/GP1BA/CCL21	5
GO:0033631	cell-cell adhesion mediated by integrin	3/150	17/18903	0.000306927	0.00309265	0.00217849	CD3E/SKAP1/CXCL13	3
GO:0035710	CD4-positive, alpha-beta T cell activation	6/150	115/18903	0.000312217	0.00311628	0.00219513	CD3E/IL2RG/SLAMF6/SPN/CCL19/PLA2G2D	6
GO:0032735	positive regulation of interleukin-12 production	4/150	42/18903	0.00033723	0.00333448	0.00234883	LTB/CCR7/IDO1/CCL19	4
GO:0045582	positive regulation of T cell differentiation	6/150	117/18903	0.000342576	0.00335597	0.00236397	IL2RG/ZAP70/CD27/PTPRC/CCL19/IL7R	6
GO:0050856	regulation of T cell receptor signaling pathway	4/150	44/18903	0.000404002	0.00392142	0.00276228	UBASH3A/LCK/SH2D1A/CCR7	4
GO:0002698	negative regulation of immune effector process	6/150	122/18903	0.000428637	0.00412057	0.00290256	CD96/FCRL3/PTPRC/IL7R/CR2/CD22	6
GO:0002923	regulation of humoral immune response mediated by circulating immunoglobulin	3/150	19/18903	0.000432309	0.00412057	0.00290256	PTPRC/CR2/FCER2	3
GO:0051651	maintenance of location in cell	8/150	226/18903	0.000453031	0.00427953	0.00301453	LCK/CCR7/PTPRC/CCL19/GP1BA/CD19/CXCL9/CCL21	8
GO:0002577	regulation of antigen processing and presentation	3/150	20/18903	0.000505649	0.00473431	0.00333488	CCR7/CCL19/CCL21	3
GO:0002706	regulation of lymphocyte mediated immunity	7/150	179/18903	0.000573136	0.00527286	0.00371424	CD96/SLAMF6/SH2D1A/PTPRC/IL7R/CR2/FCER2	7
GO:0045580	regulation of T cell differentiation	7/150	179/18903	0.000573136	0.00527286	0.00371424	CD2/IL2RG/ZAP70/CD27/PTPRC/CCL19/IL7R	7
GO:0045621	positive regulation of lymphocyte differentiation	6/150	130/18903	0.000600467	0.00547668	0.00385781	IL2RG/ZAP70/CD27/PTPRC/CCL19/IL7R	6
GO:0033628	regulation of cell adhesion mediated by integrin	4/150	49/18903	0.000611487	0.00552952	0.00389503	CD3E/SKAP1/CCL21/CXCL13	4
GO:0043367	CD4-positive, alpha-beta T cell differentiation	5/150	88/18903	0.000679162	0.00608943	0.00428944	IL2RG/SLAMF6/SPN/CCL19/PLA2G2D	5
GO:0001909	leukocyte mediated cytotoxicity	6/150	134/18903	0.000704306	0.00626182	0.00441087	CD2/SLAMF6/SH2D1A/PTPRC/IL7R/IGHG1	6
GO:0006968	cellular defense response	4/150	52/18903	0.00076708	0.00669445	0.00471562	SH2D1A/SPN/ITK/CXCL9	4
GO:0010560	positive regulation of glycoprotein biosynthetic process	3/150	23/18903	0.00077195	0.00669445	0.00471562	CCR7/CCL19/CCL21	3
GO:0034695	response to prostaglandin E	3/150	23/18903	0.00077195	0.00669445	0.00471562	CCR7/CCL19/CCL21	3
GO:0001906	cell killing	7/150	189/18903	0.00079031	0.00679795	0.00478853	CD2/SLAMF6/SH2D1A/PTPRC/IL7R/FCER2/IGHG1	7
GO:0002922	positive regulation of humoral immune response	3/150	24/18903	0.000877119	0.00736501	0.00518797	CCR7/PTPRC/FCER2	3
GO:0050855	regulation of B cell receptor signaling pathway	3/150	24/18903	0.000877119	0.00736501	0.00518797	FCRL3/CD19/CD22	3
GO:0070233	negative regulation of T cell apoptotic process	3/150	24/18903	0.000877119	0.00736501	0.00518797	CD27/IDO1/IL7R	3
GO:1902105	regulation of leukocyte differentiation	9/150	317/18903	0.000984656	0.00812737	0.00572498	CD2/IL2RG/ZAP70/IKZF3/FCRL3/CD27/PTPRC/CCL19/IL7R	9
GO:0046641	positive regulation of alpha-beta T cell proliferation	3/150	25/18903	0.000990955	0.00812737	0.00572498	CD3E/ZAP70/PTPRC	3
GO:0090023	positive regulation of neutrophil chemotaxis	3/150	25/18903	0.000990955	0.00812737	0.00572498	CCR7/CCL19/CCL21	3
GO:0001954	positive regulation of cell-matrix adhesion	4/150	56/18903	0.00101548	0.00813924	0.00573334	CD3E/SKAP1/CCR7/CCL21	4
GO:0002707	negative regulation of lymphocyte mediated immunity	4/150	56/18903	0.00101548	0.00813924	0.00573334	CD96/PTPRC/IL7R/CR2	4
GO:0043551	regulation of phosphatidylinositol 3-kinase activity	4/150	56/18903	0.00101548	0.00813924	0.00573334	CCR7/CCL19/CD19/CCL21	4
GO:0061756	leukocyte adhesion to vascular endothelial cell	4/150	57/18903	0.00108545	0.00860089	0.00605853	SPN/SELL/GP1BA/CCL21	4
GO:0050671	positive regulation of lymphocyte proliferation	6/150	146/18903	0.00110073	0.00860089	0.00605853	CD3E/CD6/ZAP70/FCRL3/PTPRC/CCL19	6
GO:0033622	integrin activation	3/150	26/18903	0.00111373	0.00860089	0.00605853	SKAP1/MZB1/CXCL13	3
GO:0050857	positive regulation of antigen receptor-mediated signaling pathway	3/150	26/18903	0.00111373	0.00860089	0.00605853	LCK/CCR7/PTPRC	3
GO:1903020	positive regulation of glycoprotein metabolic process	3/150	26/18903	0.00111373	0.00860089	0.00605853	CCR7/CCL19/CCL21	3
GO:0032946	positive regulation of mononuclear cell proliferation	6/150	149/18903	0.00122234	0.00937126	0.00660119	CD3E/CD6/ZAP70/FCRL3/PTPRC/CCL19	6
GO:0002407	dendritic cell chemotaxis	3/150	27/18903	0.00124569	0.00948161	0.00667891	CCR7/CCL19/CCL21	3
GO:0071674	mononuclear cell migration	7/150	206/18903	0.0013042	0.00985604	0.00694267	ITGAL/ZAP70/SPN/CCR7/CCL19/CCL21/CXCL13	7
GO:0031341	regulation of cell killing	5/150	102/18903	0.00132156	0.00991637	0.00698517	SLAMF6/SH2D1A/PTPRC/IL7R/FCER2	5
GO:0002285	lymphocyte activation involved in immune response	7/150	207/18903	0.00134104	0.00999171	0.00703824	ITGAL/SLAMF6/SPN/PTPRC/CCL19/POU2AF1/CD19	7

## Sheet: Sheet 2
ID	Description	GeneRatio	BgRatio	pvalue	p.adjust	qvalue	geneID	Count
GO:0030198	extracellular matrix organization	24/178	318/18903	3.50047e-15	4.4741e-12	3.25488e-12	COL12A1/ECM2/CREB3L1/FAP/CRISPLD2/RUNX1/COL14A1/FOXC2/MMP28/COL8A1/CCDC80/AGT/ADAMTSL1/LAMA2/FBLN5/IL6/TNXB/PTX3/PDPN/COL10A1/SFRP2/VIT/COL9A3/ANGPTL7	24
GO:0043062	extracellular structure organization	24/178	319/18903	3.75529e-15	4.4741e-12	3.25488e-12	COL12A1/ECM2/CREB3L1/FAP/CRISPLD2/RUNX1/COL14A1/FOXC2/MMP28/COL8A1/CCDC80/AGT/ADAMTSL1/LAMA2/FBLN5/IL6/TNXB/PTX3/PDPN/COL10A1/SFRP2/VIT/COL9A3/ANGPTL7	24
GO:0045229	external encapsulating structure organization	24/178	321/18903	4.31863e-15	4.4741e-12	3.25488e-12	COL12A1/ECM2/CREB3L1/FAP/CRISPLD2/RUNX1/COL14A1/FOXC2/MMP28/COL8A1/CCDC80/AGT/ADAMTSL1/LAMA2/FBLN5/IL6/TNXB/PTX3/PDPN/COL10A1/SFRP2/VIT/COL9A3/ANGPTL7	24
GO:0050673	epithelial cell proliferation	22/178	481/18903	9.85622e-10	7.65828e-07	5.57136e-07	CD109/YAP1/KLF9/FAP/ANG/OSR2/THBS1/COL8A1/FGF1/F3/NR4A3/FST/RUNX2/MIR27A/GPC3/EGR3/IL6/FGF7/MIR23A/CLDN1/SFRP2/SOX2	22
GO:0032496	response to lipopolysaccharide	18/178	339/18903	3.60607e-09	2.24153e-06	1.6307e-06	SPON2/PLSCR4/THBD/TREM2/PTGS2/CXCL8/TIMP4/SLC11A1/CXCL2/IL6/SELE/FMO1/CXCL3/GJB2/CLDN1/CXCL1/PENK/CSF3	18
GO:0001503	ossification	20/178	429/18903	4.34885e-09	2.2527e-06	1.63883e-06	YAP1/CREB3L1/WWTR1/RUNX1/OSR2/FOXC2/TNFAIP6/FZD1/PTGS2/RUNX2/MIR27A/EGR2/GPC3/OMD/IL6/SOX8/DHH/PENK/SFRP2/SOX2	20
GO:0007369	gastrulation	14/178	196/18903	5.12479e-09	2.27541e-06	1.65534e-06	COL12A1/WLS/INHBA/FOXC2/COL8A1/KLF4/SOX17/DUSP5/NR4A3/GPC3/ITGB4/SFRP2/MIR221/SOX2	14
GO:0042060	wound healing	20/178	442/18903	7.20753e-09	2.80013e-06	2.03708e-06	CD109/MYOF/YAP1/FAP/TNFRSF12A/FOXC2/THBS1/FGF1/F3/THBD/TFPI2/SLC11A1/PLAUR/IL6/F13A1/PDPN/CLDN1/MIR221/ENTPD2/ERBB3	20
GO:0001667	ameboidal-type cell migration	21/178	492/18903	8.23799e-09	2.84485e-06	2.06962e-06	FAP/STARD13/FOXC2/THBS1/DAAM2/KLF4/SOX17/SRPX2/FGF1/TPBG/DCN/AGT/PTGS2/MIR27A/GPC3/EGR3/FGF7/SOX8/MIR23A/ITGB4/MIR221	21
GO:0002237	response to molecule of bacterial origin	18/178	360/18903	9.21771e-09	2.86486e-06	2.08417e-06	SPON2/PLSCR4/THBD/TREM2/PTGS2/CXCL8/TIMP4/SLC11A1/CXCL2/IL6/SELE/FMO1/CXCL3/GJB2/CLDN1/CXCL1/PENK/CSF3	18
GO:0002042	cell migration involved in sprouting angiogenesis	10/178	94/18903	1.94323e-08	5.49051e-06	3.99432e-06	STARD13/FOXC2/THBS1/KLF4/SRPX2/PTGS2/MIR27A/EGR3/MIR23A/MIR221	10
GO:0001704	formation of primary germ layer	11/178	127/18903	3.27125e-08	8.47254e-06	6.16372e-06	COL12A1/WLS/INHBA/FOXC2/COL8A1/KLF4/SOX17/DUSP5/ITGB4/SFRP2/SOX2	11
GO:0060070	canonical Wnt signaling pathway	16/178	310/18903	4.1274e-08	9.86767e-06	7.17867e-06	WLS/LATS2/YAP1/WWTR1/DAAM2/KLF4/SOX17/FZD1/TPBG/PLEKHA4/FOXD1/NR4A2/SFRP4/GPC3/SFRP2/SOX2	16
GO:0090049	regulation of cell migration involved in sprouting angiogenesis	9/178	78/18903	4.96131e-08	1.10141e-05	8.01269e-06	STARD13/FOXC2/THBS1/KLF4/SRPX2/PTGS2/MIR27A/MIR23A/MIR221	9
GO:1903053	regulation of extracellular matrix organization	8/178	57/18903	5.88757e-08	1.2199e-05	8.87473e-06	FAP/RUNX1/AGT/LAMA2/IL6/TNXB/PDPN/ANGPTL7	8
GO:0050678	regulation of epithelial cell proliferation	18/178	414/18903	7.78666e-08	1.51256e-05	1.10038e-05	CD109/YAP1/KLF9/ANG/OSR2/THBS1/FGF1/F3/NR4A3/RUNX2/MIR27A/GPC3/EGR3/FGF7/MIR23A/CLDN1/SFRP2/SOX2	18
GO:0090287	regulation of cellular response to growth factor stimulus	16/178	338/18903	1.35475e-07	2.4768e-05	1.80186e-05	LTBP1/CD109/LATS2/CREB3L1/THBS1/TNFAIP6/FGF1/FZD1/DCN/FOXD1/AGT/FST/SFRP4/RUNX2/GPC3/SFRP2	16
GO:0002040	sprouting angiogenesis	12/178	185/18903	1.90237e-07	3.28476e-05	2.38964e-05	CREB3L1/STARD13/FOXC2/THBS1/KLF4/SRPX2/FGF1/PTGS2/MIR27A/EGR3/MIR23A/MIR221	12
GO:0001656	metanephros development	9/178	92/18903	2.11131e-07	3.45366e-05	2.51251e-05	YAP1/WWTR1/OSR2/FOXC2/SOX17/FOXD1/GPC3/SOX8/LIF	9
GO:0010001	glial cell differentiation	13/178	227/18903	2.46736e-07	3.71827e-05	2.70502e-05	DAAM2/TREM2/EGR2/IL6/SOX8/ASPA/ITGB4/RELN/PTPRZ1/LIF/PLP1/ERBB3/SOX2	13
GO:0042063	gliogenesis	15/178	310/18903	2.56352e-07	3.71827e-05	2.70502e-05	DAAM2/TREM2/EGR2/IL6/SOX8/ASPA/ITGB4/PENK/RELN/PTPRZ1/LIF/PLP1/MIR221/ERBB3/SOX2	15
GO:1901342	regulation of vasculature development	16/178	355/18903	2.63198e-07	3.71827e-05	2.70502e-05	CREB3L1/RUNX1/FOXC2/THBS1/KLF4/FGF1/HSPB6/F3/DCN/AGT/CXCL8/IL6/ANGPTL4/SFRP2/ANGPTL7/MIR221	16
GO:0016055	Wnt signaling pathway	18/178	456/18903	3.26198e-07	4.40792e-05	3.20674e-05	GPC4/WLS/LATS2/YAP1/MDFI/WWTR1/DAAM2/KLF4/SOX17/FZD1/TPBG/PLEKHA4/FOXD1/NR4A2/SFRP4/GPC3/SFRP2/SOX2	18
GO:0198738	cell-cell signaling by wnt	18/178	458/18903	3.47756e-07	4.50344e-05	3.27623e-05	GPC4/WLS/LATS2/YAP1/MDFI/WWTR1/DAAM2/KLF4/SOX17/FZD1/TPBG/PLEKHA4/FOXD1/NR4A2/SFRP4/GPC3/SFRP2/SOX2	18
GO:0010631	epithelial cell migration	16/178	366/18903	3.96211e-07	4.75889e-05	3.46206e-05	FAP/STARD13/FOXC2/THBS1/DAAM2/KLF4/SRPX2/FGF1/DCN/AGT/PTGS2/MIR27A/EGR3/FGF7/MIR23A/MIR221	16
GO:2000027	regulation of animal organ morphogenesis	10/178	129/18903	3.98105e-07	4.75889e-05	3.46206e-05	GPC4/FGF1/FZD1/PLEKHA4/AGT/RUNX2/GPC3/FGF7/SOX8/SFRP2	10
GO:0090132	epithelium migration	16/178	369/18903	4.41795e-07	5.08555e-05	3.69971e-05	FAP/STARD13/FOXC2/THBS1/DAAM2/KLF4/SRPX2/FGF1/DCN/AGT/PTGS2/MIR27A/EGR3/FGF7/MIR23A/MIR221	16
GO:0043542	endothelial cell migration	14/178	281/18903	4.59768e-07	5.10342e-05	3.71271e-05	FAP/STARD13/FOXC2/THBS1/KLF4/SRPX2/FGF1/DCN/AGT/PTGS2/MIR27A/EGR3/MIR23A/MIR221	14
GO:0090130	tissue migration	16/178	374/18903	5.28426e-07	5.66327e-05	4.12e-05	FAP/STARD13/FOXC2/THBS1/DAAM2/KLF4/SRPX2/FGF1/DCN/AGT/PTGS2/MIR27A/EGR3/FGF7/MIR23A/MIR221	16
GO:0001649	osteoblast differentiation	13/178	246/18903	6.17697e-07	6.39935e-05	4.65549e-05	YAP1/CREB3L1/WWTR1/TNFAIP6/FZD1/RUNX2/MIR27A/IL6/SOX8/DHH/PENK/SFRP2/SOX2	13
GO:0033002	muscle cell proliferation	13/178	247/18903	6.46724e-07	6.48393e-05	4.71702e-05	YAP1/RUNX1/ANG/FOXC2/THBS1/AGT/OGN/NR4A3/PTGS2/MIR27A/APOD/IL6/MIR221	13
GO:0061041	regulation of wound healing	10/178	137/18903	6.95803e-07	6.75798e-05	4.9164e-05	CD109/FAP/TNFRSF12A/FOXC2/THBS1/F3/THBD/PLAUR/CLDN1/MIR221	10
GO:1903034	regulation of response to wounding	11/178	172/18903	7.1892e-07	6.77092e-05	4.9258e-05	CD109/FAP/TNFRSF12A/FOXC2/THBS1/KLF4/F3/THBD/PLAUR/CLDN1/MIR221	11
GO:0014013	regulation of gliogenesis	9/178	107/18903	7.72201e-07	6.8767e-05	5.00276e-05	DAAM2/TREM2/EGR2/IL6/SOX8/ASPA/PTPRZ1/LIF/MIR221	9
GO:0045785	positive regulation of cell adhesion	18/178	484/18903	7.74403e-07	6.8767e-05	5.00276e-05	ECM2/RUNX1/MYO10/FOXC2/COL8A1/CCDC80/NR4A3/LAMA2/EGR3/TNFSF9/PLAUR/IL6/SELE/PDPN/SFRP2/VIT/LIF/SOX2	18
GO:0045765	regulation of angiogenesis	15/178	349/18903	1.14714e-06	9.67588e-05	7.03915e-05	CREB3L1/RUNX1/FOXC2/THBS1/KLF4/FGF1/HSPB6/F3/DCN/AGT/CXCL8/IL6/ANGPTL4/SFRP2/MIR221	15
GO:0060828	regulation of canonical Wnt signaling pathway	13/178	260/18903	1.15189e-06	9.67588e-05	7.03915e-05	WLS/LATS2/YAP1/WWTR1/DAAM2/SOX17/FZD1/TPBG/PLEKHA4/SFRP4/GPC3/SFRP2/SOX2	13
GO:0072073	kidney epithelium development	10/178	146/18903	1.24853e-06	0.000102117	7.42894e-05	YAP1/WWTR1/FOXC2/FGF1/FOXD1/AGT/GPC3/CRLF1/SOX8/LIF	10
GO:0010466	negative regulation of peptidase activity	13/178	263/18903	1.3095e-06	0.000104357	7.59191e-05	CD109/THBS1/KLF4/CRYAB/AGT/PTGS2/TFPI2/GPC3/TIMP4/PLAUR/ITIH5/SFRP2/PI16	13
GO:0050679	positive regulation of epithelial cell proliferation	12/178	224/18903	1.46709e-06	0.000113993	8.29291e-05	YAP1/ANG/OSR2/FGF1/F3/NR4A3/RUNX2/MIR27A/EGR3/FGF7/MIR23A/CLDN1	12
GO:0072009	nephron epithelium development	9/178	116/18903	1.52716e-06	0.000115766	8.42191e-05	YAP1/WWTR1/FOXC2/FGF1/FOXD1/AGT/GPC3/SOX8/LIF	9
GO:0010594	regulation of endothelial cell migration	12/178	230/18903	1.93409e-06	0.000143122	0.000104121	STARD13/FOXC2/THBS1/KLF4/SRPX2/FGF1/DCN/AGT/PTGS2/MIR27A/MIR23A/MIR221	12
GO:0051346	negative regulation of hydrolase activity	15/178	373/18903	2.60917e-06	0.000186211	0.000135468	CD109/THBS1/KLF4/CRYAB/AGT/PTGS2/TFPI2/GPC3/TIMP4/PLAUR/PTX3/ANGPTL4/ITIH5/SFRP2/PI16	15
GO:0072089	stem cell proliferation	9/178	124/18903	2.66521e-06	0.000186211	0.000135468	CD109/YAP1/RUNX1/OSR2/PRRX1/SOX17/RUNX2/SFRP2/MIR221	9
GO:2001233	regulation of apoptotic signaling pathway	15/178	374/18903	2.69611e-06	0.000186211	0.000135468	YAP1/CREB3L1/TNFRSF12A/INHBA/THBS1/YBX3/SRPX/ITPRIP/TREM2/NR4A2/AGT/PTGS2/PLAUR/SFRP2/MIR221	15
GO:0045165	cell fate commitment	13/178	282/18903	2.8357e-06	0.000191595	0.000139384	LATS2/FOXC2/PRRX1/KLF4/SOX17/RUNX2/IL6/TNXB/SOX8/DHH/PDPN/SFRP2/SOX2	13
GO:0072080	nephron tubule development	8/178	96/18903	3.45866e-06	0.000228713	0.000166388	YAP1/WWTR1/FGF1/FOXD1/AGT/GPC3/SOX8/LIF	8
GO:0045444	fat cell differentiation	12/178	244/18903	3.56753e-06	0.000230997	0.000168049	YAP1/WWTR1/KLF4/NR4A2/NR4A3/PTGS2/MIR27A/EGR2/MEDAG/IL6/SOX8/SFRP2	12
GO:0006979	response to oxidative stress	16/178	434/18903	3.66566e-06	0.000232507	0.000169148	GPX8/SOD3/ACOX2/CRYAB/FZD1/TREM2/NR4A2/NR4A3/PTGS2/FBLN5/FOSL1/APOD/IL6/GJB2/PENK/ANGPTL7	16
GO:0030111	regulation of Wnt signaling pathway	14/178	336/18903	3.78783e-06	0.000234381	0.000170511	WLS/LATS2/YAP1/MDFI/WWTR1/DAAM2/SOX17/FZD1/TPBG/PLEKHA4/SFRP4/GPC3/SFRP2/SOX2	14
GO:0014015	positive regulation of gliogenesis	7/178	69/18903	3.84862e-06	0.000234381	0.000170511	EGR2/IL6/SOX8/ASPA/PTPRZ1/LIF/MIR221	7
GO:2000050	regulation of non-canonical Wnt signaling pathway	5/178	26/18903	3.92144e-06	0.000234381	0.000170511	DAAM2/PLEKHA4/SFRP4/GPC3/SFRP2	5
GO:0010632	regulation of epithelial cell migration	13/178	292/18903	4.15209e-06	0.000241582	0.00017575	STARD13/FOXC2/THBS1/KLF4/SRPX2/FGF1/DCN/AGT/PTGS2/MIR27A/FGF7/MIR23A/MIR221	13
GO:0010595	positive regulation of endothelial cell migration	9/178	131/18903	4.19738e-06	0.000241582	0.00017575	FOXC2/THBS1/SRPX2/FGF1/AGT/PTGS2/MIR27A/MIR23A/MIR221	9
GO:0061326	renal tubule development	8/178	99/18903	4.35975e-06	0.000246366	0.00017923	YAP1/WWTR1/FGF1/FOXD1/AGT/GPC3/SOX8/LIF	8
GO:1903055	positive regulation of extracellular matrix organization	5/178	27/18903	4.7761e-06	0.000265073	0.000192839	RUNX1/AGT/IL6/TNXB/PDPN	5
GO:0035567	non-canonical Wnt signaling pathway	7/178	72/18903	5.13167e-06	0.000279811	0.000203561	GPC4/DAAM2/FZD1/PLEKHA4/SFRP4/GPC3/SFRP2	7
GO:0001823	mesonephros development	8/178	102/18903	5.45232e-06	0.000292169	0.000212551	OSR2/FOXC2/FGF1/FOXD1/AGT/GPC3/CRLF1/SOX8	8
GO:0030178	negative regulation of Wnt signaling pathway	10/178	174/18903	6.06037e-06	0.000319248	0.000232251	LATS2/MDFI/WWTR1/SOX17/FZD1/TPBG/SFRP4/GPC3/SFRP2/SOX2	10
GO:0048660	regulation of smooth muscle cell proliferation	10/178	175/18903	6.37594e-06	0.000330274	0.000240272	ANG/THBS1/AGT/OGN/NR4A3/PTGS2/MIR27A/APOD/IL6/MIR221	10
GO:0010634	positive regulation of epithelial cell migration	10/178	176/18903	6.70563e-06	0.000338484	0.000246245	FOXC2/THBS1/SRPX2/FGF1/AGT/PTGS2/MIR27A/FGF7/MIR23A/MIR221	10
GO:0043536	positive regulation of blood vessel endothelial cell migration	7/178	75/18903	6.75225e-06	0.000338484	0.000246245	FOXC2/THBS1/SRPX2/PTGS2/MIR27A/MIR23A/MIR221	7
GO:0043534	blood vessel endothelial cell migration	10/178	177/18903	7.04998e-06	0.000347799	0.000253022	STARD13/FOXC2/THBS1/KLF4/SRPX2/PTGS2/MIR27A/EGR3/MIR23A/MIR221	10
GO:0045685	regulation of glial cell differentiation	7/178	76/18903	7.37871e-06	0.000358329	0.000260682	DAAM2/TREM2/EGR2/IL6/ASPA/PTPRZ1/LIF	7
GO:0090090	negative regulation of canonical Wnt signaling pathway	9/178	141/18903	7.66349e-06	0.000366433	0.000266578	LATS2/WWTR1/SOX17/FZD1/TPBG/SFRP4/GPC3/SFRP2/SOX2	9
GO:0048659	smooth muscle cell proliferation	10/178	179/18903	7.7848e-06	0.000366593	0.000266695	ANG/THBS1/AGT/OGN/NR4A3/PTGS2/MIR27A/APOD/IL6/MIR221	10
GO:0050730	regulation of peptidyl-tyrosine phosphorylation	12/178	266/18903	8.60227e-06	0.000399043	0.000290301	TREM2/AGT/GPRC5A/IL6/FGF7/CRLF1/SFRP2/RELN/LIF/MIR221/CSF3/ERBB3	12
GO:0060326	cell chemotaxis	13/178	319/18903	1.07691e-05	0.000492213	0.000358082	THBS1/TNFAIP6/MMP28/FGF1/TPBG/CXCL8/CXCL2/EGR3/CH25H/IL6/CXCL3/CCL13/CXCL1	13
GO:0007422	peripheral nervous system development	7/178	81/18903	1.12815e-05	0.000500186	0.000363882	RUNX1/EGR2/EGR3/SOX8/CLDN1/ITGB4/ERBB3	7
GO:0045766	positive regulation of angiogenesis	10/178	187/18903	1.14264e-05	0.000500186	0.000363882	RUNX1/FOXC2/THBS1/KLF4/FGF1/HSPB6/F3/CXCL8/ANGPTL4/SFRP2	10
GO:1904018	positive regulation of vasculature development	10/178	187/18903	1.14264e-05	0.000500186	0.000363882	RUNX1/FOXC2/THBS1/KLF4/FGF1/HSPB6/F3/CXCL8/ANGPTL4/SFRP2	10
GO:0043535	regulation of blood vessel endothelial cell migration	9/178	150/18903	1.26412e-05	0.00054568	0.000396979	STARD13/FOXC2/THBS1/KLF4/SRPX2/PTGS2/MIR27A/MIR23A/MIR221	9
GO:0060795	cell fate commitment involved in formation of primary germ layer	5/178	33/18903	1.34133e-05	0.000571075	0.000415454	FOXC2/KLF4/SOX17/SFRP2/SOX2	5
GO:0072006	nephron development	9/178	152/18903	1.40607e-05	0.000590551	0.000429622	YAP1/WWTR1/FOXC2/FGF1/FOXD1/AGT/GPC3/SOX8/LIF	9
GO:0031099	regeneration	10/178	192/18903	1.43809e-05	0.000595944	0.000433546	YAP1/RUNX1/PRRX1/KLF4/NR4A3/APOD/IL6/CLDN1/MIR221/SOX2	10
GO:0050731	positive regulation of peptidyl-tyrosine phosphorylation	10/178	193/18903	1.50448e-05	0.000615251	0.000447592	TREM2/AGT/IL6/FGF7/CRLF1/RELN/LIF/MIR221/CSF3/ERBB3	10
GO:0048333	mesodermal cell differentiation	5/178	34/18903	1.56066e-05	0.000629937	0.000458276	INHBA/FOXC2/KLF4/ITGB4/SFRP2	5
GO:2001236	regulation of extrinsic apoptotic signaling pathway	9/178	155/18903	1.64438e-05	0.000655223	0.000476671	YAP1/TNFRSF12A/INHBA/THBS1/SRPX/ITPRIP/AGT/SFRP2/MIR221	9
GO:0001706	endoderm formation	6/178	58/18903	1.72808e-05	0.000671361	0.000488411	COL12A1/INHBA/COL8A1/SOX17/DUSP5/SOX2	6
GO:0048008	platelet-derived growth factor receptor signaling pathway	6/178	58/18903	1.72808e-05	0.000671361	0.000488411	CSRNP1/F3/NR4A3/PDGFRL/APOD/MIR221	6
GO:0090050	positive regulation of cell migration involved in sprouting angiogenesis	5/178	35/18903	1.80695e-05	0.000693332	0.000504395	FOXC2/SRPX2/PTGS2/MIR27A/MIR23A	5
GO:0097529	myeloid leukocyte migration	11/178	242/18903	1.91824e-05	0.000727059	0.000528932	IL1R1/THBS1/TNFAIP6/MMP28/TREM2/CXCL8/CXCL2/IL6/CXCL3/CCL13/CXCL1	11
GO:0090092	regulation of transmembrane receptor protein serine/threonine kinase signaling pathway	12/178	290/18903	2.03835e-05	0.000755589	0.000549687	LTBP1/CD109/LATS2/INHBA/THBS1/TNFAIP6/FZD1/FOXD1/FST/SFRP4/GPC3/SFRP2	12
GO:0007178	transmembrane receptor protein serine/threonine kinase signaling pathway	14/178	390/18903	2.04213e-05	0.000755589	0.000549687	LTBP1/CD109/LATS2/WWTR1/INHBA/THBS1/TNFAIP6/FZD1/FOXD1/FST/SFRP4/RUNX2/GPC3/SFRP2	14
GO:0051917	regulation of fibrinolysis	4/178	18/18903	2.09802e-05	0.000767136	0.000558087	FAP/THBS1/THBD/PLAUR	4
GO:0019730	antimicrobial humoral response	8/178	125/18903	2.4341e-05	0.000879674	0.000639958	SPON2/ANG/CXCL8/SLC11A1/CXCL2/CXCL3/CCL13/CXCL1	8
GO:0090303	positive regulation of wound healing	6/178	62/18903	2.54422e-05	0.000902213	0.000656355	FOXC2/THBS1/F3/THBD/CLDN1/MIR221	6
GO:0050900	leukocyte migration	14/178	398/18903	2.55453e-05	0.000902213	0.000656355	IL1R1/THBS1/TNFAIP6/MMP28/TREM2/CXCL8/APOD/CXCL2/CH25H/IL6/SELE/CXCL3/CCL13/CXCL1	14
GO:0072091	regulation of stem cell proliferation	7/178	92/18903	2.60588e-05	0.00091001	0.000662027	CD109/YAP1/OSR2/PRRX1/SOX17/RUNX2/MIR221	7
GO:0010951	negative regulation of endopeptidase activity	11/178	252/18903	2.78731e-05	0.000962551	0.000700251	CD109/THBS1/KLF4/CRYAB/AGT/PTGS2/TFPI2/TIMP4/PLAUR/ITIH5/SFRP2	11
GO:0045861	negative regulation of proteolysis	13/178	352/18903	3.03042e-05	0.001035	0.00075296	CD109/THBS1/KLF4/CRYAB/AGT/PTGS2/TFPI2/GPC3/TIMP4/PLAUR/ITIH5/SFRP2/PI16	13
GO:0052547	regulation of peptidase activity	15/178	459/18903	3.06819e-05	0.00103651	0.000754058	CD109/THBS1/KLF4/CRYAB/F3/AGT/PTGS2/TFPI2/GPC3/TIMP4/PLAUR/ITIH5/SFRP2/PI16/SOX2	15
GO:0032570	response to progesterone	5/178	39/18903	3.10861e-05	0.00103888	0.000755777	YAP1/THBS1/FOSB/FOSL1/GJB2	5
GO:0072234	metanephric nephron tubule development	4/178	20/18903	3.2733e-05	0.00108228	0.000787352	YAP1/WWTR1/SOX8/LIF	4
GO:0001657	ureteric bud development	7/178	97/18903	3.67342e-05	0.00118927	0.000865187	FOXC2/FGF1/FOXD1/AGT/GPC3/CRLF1/SOX8	7
GO:0060993	kidney morphogenesis	7/178	97/18903	3.67342e-05	0.00118927	0.000865187	WWTR1/FGF1/FOXD1/AGT/GPC3/SOX8/LIF	7
GO:0001822	kidney development	12/178	309/18903	3.79503e-05	0.00121597	0.000884614	YAP1/WWTR1/OSR2/FOXC2/SOX17/FGF1/FOXD1/AGT/GPC3/CRLF1/SOX8/LIF	12
GO:0048661	positive regulation of smooth muscle cell proliferation	7/178	98/18903	3.92492e-05	0.00121986	0.000887444	THBS1/AGT/NR4A3/PTGS2/MIR27A/IL6/MIR221	7
GO:0072163	mesonephric epithelium development	7/178	98/18903	3.92492e-05	0.00121986	0.000887444	FOXC2/FGF1/FOXD1/AGT/GPC3/CRLF1/SOX8	7
GO:0072164	mesonephric tubule development	7/178	98/18903	3.92492e-05	0.00121986	0.000887444	FOXC2/FGF1/FOXD1/AGT/GPC3/CRLF1/SOX8	7
GO:0072001	renal system development	12/178	318/18903	5.00944e-05	0.00154152	0.00112145	YAP1/WWTR1/OSR2/FOXC2/SOX17/FGF1/FOXD1/AGT/GPC3/CRLF1/SOX8/LIF	12
GO:0003158	endothelium development	8/178	139/18903	5.21105e-05	0.00158784	0.00115514	STARD13/FOXC2/SOX17/FGF1/FZD1/PDPN/ARHGEF26/CLDN1	8
GO:0006959	humoral immune response	12/178	320/18903	5.32094e-05	0.00159002	0.00115673	SPON2/ANG/CFH/TREM2/VSIG4/CXCL8/SLC11A1/CXCL2/IL6/CXCL3/CCL13/CXCL1	12
GO:0035265	organ growth	9/178	180/18903	5.34353e-05	0.00159002	0.00115673	LATS2/YAP1/RUNX1/FOXC2/YBX3/AGT/FGF7/MIR23A/PI16	9
GO:0097191	extrinsic apoptotic signaling pathway	10/178	224/18903	5.37169e-05	0.00159002	0.00115673	YAP1/TNFRSF12A/INHBA/THBS1/SRPX/ITPRIP/AGT/SFRP2/MIR221/ERBB3	10
GO:0007596	blood coagulation	10/178	225/18903	5.57639e-05	0.00163504	0.00118948	FAP/THBS1/F3/THBD/TFPI2/PLAUR/IL6/F13A1/PDPN/ENTPD2	10
GO:0072170	metanephric tubule development	4/178	23/18903	5.85185e-05	0.00168403	0.00122513	YAP1/WWTR1/SOX8/LIF	4
GO:0072243	metanephric nephron epithelium development	4/178	23/18903	5.85185e-05	0.00168403	0.00122513	YAP1/WWTR1/SOX8/LIF	4
GO:0051384	response to glucocorticoid	8/178	142/18903	6.06258e-05	0.00172867	0.0012576	KLF9/FIBIN/PTGS2/FOSB/FOSL1/IL6/GJB2/CLDN1	8
GO:0010712	regulation of collagen metabolic process	5/178	45/18903	6.30217e-05	0.00178065	0.00129541	CREB3L1/FAP/RUNX1/INHBA/IL6	5
GO:0050817	coagulation	10/178	230/18903	6.70256e-05	0.00187672	0.0013653	FAP/THBS1/F3/THBD/TFPI2/PLAUR/IL6/F13A1/PDPN/ENTPD2	10
GO:0032963	collagen metabolic process	7/178	107/18903	6.89132e-05	0.00189532	0.00137884	CREB3L1/FAP/RUNX1/INHBA/MMP28/IL6/TNXB	7
GO:0007599	hemostasis	10/178	231/18903	6.94959e-05	0.00189532	0.00137884	FAP/THBS1/F3/THBD/TFPI2/PLAUR/IL6/F13A1/PDPN/ENTPD2	10
GO:0001707	mesoderm formation	6/178	74/18903	6.98424e-05	0.00189532	0.00137884	WLS/INHBA/FOXC2/KLF4/ITGB4/SFRP2	6
GO:0051962	positive regulation of nervous system development	11/178	279/18903	7.01293e-05	0.00189532	0.00137884	IL1RAP/SRPX2/TPBG/EGR2/IL6/SOX8/ASPA/RELN/PTPRZ1/LIF/MIR221	11
GO:0090263	positive regulation of canonical Wnt signaling pathway	7/178	108/18903	7.31112e-05	0.00195101	0.00141935	WLS/YAP1/DAAM2/PLEKHA4/SFRP4/GPC3/SFRP2	7
GO:0008406	gonad development	10/178	233/18903	7.46695e-05	0.00195101	0.00141935	ANG/INHBA/TNFAIP6/YBX3/FST/PTX3/SOX8/DHH/SFRP2/COL9A3	10
GO:2001234	negative regulation of apoptotic signaling pathway	10/178	233/18903	7.46695e-05	0.00195101	0.00141935	YAP1/CREB3L1/THBS1/YBX3/ITPRIP/NR4A2/PTGS2/PLAUR/SFRP2/MIR221	10
GO:0061138	morphogenesis of a branching epithelium	9/178	188/18903	7.47737e-05	0.00195101	0.00141935	YAP1/FOXC2/FGF1/FOXD1/AGT/GPC3/FGF7/SOX8/SFRP2	9
GO:0045669	positive regulation of osteoblast differentiation	6/178	75/18903	7.53285e-05	0.00195101	0.00141935	YAP1/WWTR1/RUNX2/MIR27A/IL6/SFRP2	6
GO:0048332	mesoderm morphogenesis	6/178	76/18903	8.11528e-05	0.00208449	0.00151645	WLS/INHBA/FOXC2/KLF4/ITGB4/SFRP2	6
GO:0030510	regulation of BMP signaling pathway	7/178	111/18903	8.69748e-05	0.00218889	0.00159241	TNFAIP6/FZD1/FOXD1/FST/SFRP4/GPC3/SFRP2	7
GO:0072088	nephron epithelium morphogenesis	6/178	77/18903	8.73303e-05	0.00218889	0.00159241	FGF1/FOXD1/AGT/GPC3/SOX8/LIF	6
GO:1903036	positive regulation of response to wounding	6/178	77/18903	8.73303e-05	0.00218889	0.00159241	FOXC2/THBS1/F3/THBD/CLDN1/MIR221	6
GO:0045137	development of primary sexual characteristics	10/178	238/18903	8.90558e-05	0.00221428	0.00161088	ANG/INHBA/TNFAIP6/YBX3/FST/PTX3/SOX8/DHH/SFRP2/COL9A3	10
GO:0048545	response to steroid hormone	12/178	339/18903	9.22021e-05	0.00224706	0.00163473	YAP1/KLF9/FIBIN/THBS1/NR4A3/PTGS2/FOSB/FOSL1/IL6/ATP1A2/GJB2/CLDN1	12
GO:0060245	detection of cell density	3/178	10/18903	9.38439e-05	0.00224706	0.00163473	YAP1/FAP/SRPX	3
GO:2000659	regulation of interleukin-1-mediated signaling pathway	3/178	10/18903	9.38439e-05	0.00224706	0.00163473	IL1R1/MIR27A/IL6	3
GO:0043154	negative regulation of cysteine-type endopeptidase activity involved in apoptotic process	6/178	78/18903	9.38764e-05	0.00224706	0.00163473	THBS1/KLF4/CRYAB/PTGS2/PLAUR/SFRP2	6
GO:0070371	ERK1 and ERK2 cascade	12/178	340/18903	9.48028e-05	0.00224706	0.00163473	INHBA/FGF1/TPBG/DUSP5/TREM2/AGT/MIR27A/CCL13/MIR23A/LIF/PLA2G2A/MIR221	12
GO:0035987	endodermal cell differentiation	5/178	49/18903	9.54172e-05	0.00224706	0.00163473	COL12A1/INHBA/COL8A1/SOX17/SOX2	5
GO:0030595	leukocyte chemotaxis	10/178	240/18903	9.54351e-05	0.00224706	0.00163473	THBS1/TNFAIP6/MMP28/CXCL8/CXCL2/CH25H/IL6/CXCL3/CCL13/CXCL1	10
GO:0044344	cellular response to fibroblast growth factor stimulus	7/178	114/18903	0.00010291	0.00240484	0.00174951	CREB3L1/THBS1/FGF1/RUNX2/CXCL8/EGR3/FGF7	7
GO:2001238	positive regulation of extrinsic apoptotic signaling pathway	5/178	50/18903	0.000105217	0.0024404	0.00177538	TNFRSF12A/INHBA/THBS1/SRPX/AGT	5
GO:0014068	positive regulation of phosphatidylinositol 3-kinase signaling	6/178	80/18903	0.000108138	0.0024677	0.00179523	DCN/TREM2/AGT/RELN/CSF3/ERBB3	6
GO:0072028	nephron morphogenesis	6/178	80/18903	0.000108138	0.0024677	0.00179523	FGF1/FOXD1/AGT/GPC3/SOX8/LIF	6
GO:0062197	cellular response to chemical stress	12/178	345/18903	0.000108776	0.0024677	0.00179523	GPX8/SOD3/YBX3/FZD1/TREM2/NR4A2/NR4A3/PTGS2/FBLN5/IL6/GJB2/PENK	12
GO:0051960	regulation of nervous system development	14/178	456/18903	0.000110184	0.00248153	0.0018053	YAP1/IL1RAP/DAAM2/SRPX2/TPBG/TREM2/EGR2/IL6/SOX8/ASPA/RELN/PTPRZ1/LIF/MIR221	14
GO:0042730	fibrinolysis	4/178	27/18903	0.000112619	0.00250014	0.00181884	FAP/THBS1/THBD/PLAUR	4
GO:0072207	metanephric epithelium development	4/178	27/18903	0.000112619	0.00250014	0.00181884	YAP1/WWTR1/SOX8/LIF	4
GO:0061844	antimicrobial humoral immune response mediated by antimicrobial peptide	6/178	81/18903	0.000115887	0.00255444	0.00185834	ANG/CXCL8/CXCL2/CXCL3/CCL13/CXCL1	6
GO:0048754	branching morphogenesis of an epithelial tube	8/178	157/18903	0.000122514	0.0026815	0.00195078	YAP1/FOXC2/FGF1/FOXD1/AGT/GPC3/SOX8/SFRP2	8
GO:0097530	granulocyte migration	8/178	158/18903	0.000128026	0.00278255	0.00202429	IL1R1/THBS1/TNFAIP6/CXCL8/CXCL2/CXCL3/CCL13/CXCL1	8
GO:0045926	negative regulation of growth	10/178	249/18903	0.000129158	0.00278765	0.002028	INHBA/MT1E/SOX17/CRYAB/AGT/GPC3/MT1M/MT1A/SFRP2/PI16	10
GO:0007492	endoderm development	6/178	83/18903	0.000132704	0.00283845	0.00206496	COL12A1/INHBA/COL8A1/SOX17/DUSP5/SOX2	6
GO:0009636	response to toxic substance	10/178	250/18903	0.00013346	0.00283845	0.00206496	GPX8/SOD3/MT1E/AHR/PTGS2/FBLN5/MT1M/MT1A/CLDN1/PENK	10
GO:0001763	morphogenesis of a branching structure	9/178	203/18903	0.000134251	0.00283845	0.00206496	YAP1/FOXC2/FGF1/FOXD1/AGT/GPC3/FGF7/SOX8/SFRP2	9
GO:0060071	Wnt signaling pathway, planar cell polarity pathway	5/178	53/18903	0.000139298	0.00290623	0.00211426	GPC4/FZD1/PLEKHA4/GPC3/SFRP2	5
GO:1901888	regulation of cell junction assembly	9/178	204/18903	0.000139327	0.00290623	0.00211426	GPC4/THBS1/IL1RAP/SRPX2/FZD1/TPBG/AGT/APOD/CLDN1	9
GO:0071774	response to fibroblast growth factor	7/178	120/18903	0.000141918	0.00292108	0.00212507	CREB3L1/THBS1/FGF1/RUNX2/CXCL8/EGR3/FGF7	7
GO:0090288	negative regulation of cellular response to growth factor stimulus	7/178	120/18903	0.000141918	0.00292108	0.00212507	CREB3L1/THBS1/TNFAIP6/FZD1/DCN/AGT/SFRP2	7
GO:1901654	response to ketone	9/178	205/18903	0.000144562	0.00295591	0.00215041	YAP1/KLF9/FIBIN/THBS1/AHR/FOSB/FOSL1/GJB2/CLDN1	9
GO:0001655	urogenital system development	12/178	360/18903	0.000161815	0.00328706	0.00239132	YAP1/WWTR1/OSR2/FOXC2/SOX17/FGF1/FOXD1/AGT/GPC3/CRLF1/SOX8/LIF	12
GO:0043616	keratinocyte proliferation	5/178	55/18903	0.000166319	0.00335663	0.00244193	CD109/YAP1/KLF9/FST/FGF7	5
GO:0072182	regulation of nephron tubule epithelial cell differentiation	3/178	12/18903	0.000169673	0.00340223	0.0024751	YAP1/WWTR1/LIF	3
GO:0031960	response to corticosteroid	8/178	165/18903	0.000172631	0.00343934	0.0025021	KLF9/FIBIN/PTGS2/FOSB/FOSL1/IL6/GJB2/CLDN1	8
GO:0030509	BMP signaling pathway	8/178	167/18903	0.000187494	0.00371167	0.00270022	TNFAIP6/FZD1/FOXD1/FST/SFRP4/RUNX2/GPC3/SFRP2	8
GO:0090175	regulation of establishment of planar polarity	5/178	57/18903	0.000197171	0.00387853	0.00282161	GPC4/FZD1/PLEKHA4/GPC3/SFRP2	5
GO:0031589	cell-substrate adhesion	12/178	369/18903	0.000203229	0.00395092	0.00287427	ECM2/THBS1/COL8A1/CCDC80/ITGBL1/FBLN5/APOD/TNXB/PDPN/ITGB4/VIT/TTYH1	12
GO:0007568	aging	8/178	169/18903	0.000203394	0.00395092	0.00287427	INHBA/CRYAB/AGT/PTGS2/APOD/GJB2/CLDN1/PENK	8
GO:0070098	chemokine-mediated signaling pathway	6/178	90/18903	0.00020734	0.00400256	0.00291184	TREM2/CXCL8/CXCL2/CXCL3/CCL13/CXCL1	6
GO:0052548	regulation of endopeptidase activity	13/178	428/18903	0.000215879	0.00414168	0.00301305	CD109/THBS1/KLF4/CRYAB/F3/AGT/PTGS2/TFPI2/TIMP4/PLAUR/ITIH5/SFRP2/SOX2	13
GO:2000117	negative regulation of cysteine-type endopeptidase activity	6/178	91/18903	0.000220263	0.00419986	0.00305537	THBS1/KLF4/CRYAB/PTGS2/PLAUR/SFRP2	6
GO:0022407	regulation of cell-cell adhesion	14/178	490/18903	0.00023186	0.00436168	0.0031731	RUNX1/MYO10/KLF4/NR4A3/MIR27A/VSIG4/EGR3/TNFSF9/PLAUR/IL6/SELE/PDPN/MIR221/SOX2	14
GO:0071621	granulocyte chemotaxis	7/178	130/18903	0.00023296	0.00436168	0.0031731	THBS1/TNFAIP6/CXCL8/CXCL2/CXCL3/CCL13/CXCL1	7
GO:1990266	neutrophil migration	7/178	130/18903	0.00023296	0.00436168	0.0031731	IL1R1/TNFAIP6/CXCL8/CXCL2/CXCL3/CCL13/CXCL1	7
GO:0055017	cardiac muscle tissue growth	6/178	93/18903	0.000248009	0.00461564	0.00335785	YAP1/RUNX1/FOXC2/AGT/MIR23A/PI16	6
GO:0001658	branching involved in ureteric bud morphogenesis	5/178	60/18903	0.000251398	0.00462335	0.00336346	FGF1/FOXD1/AGT/GPC3/SOX8	5
GO:1903670	regulation of sprouting angiogenesis	5/178	60/18903	0.000251398	0.00462335	0.00336346	CREB3L1/THBS1/KLF4/FGF1/MIR221	5
GO:0019221	cytokine-mediated signaling pathway	14/178	496/18903	0.000262423	0.00476965	0.00346989	YAP1/IL1R1/IL1RAP/F3/TREM2/MIR27A/CXCL8/CXCL2/IL6/CXCL3/CRLF1/CCL13/CXCL1/CSF3	14
GO:0043410	positive regulation of MAPK cascade	14/178	496/18903	0.000262423	0.00476965	0.00346989	INHBA/THBS1/GADD45B/FGF1/TPBG/TREM2/MIR27A/IL6/CCL13/MIR23A/LIF/PLA2G2A/MIR221/SOX2	14
GO:0018108	peptidyl-tyrosine phosphorylation	12/178	380/18903	0.000265847	0.0048038	0.00349474	TREM2/AGT/GPRC5A/IL6/FGF7/CRLF1/SFRP2/RELN/LIF/MIR221/CSF3/ERBB3	12
GO:0070374	positive regulation of ERK1 and ERK2 cascade	9/178	223/18903	0.000270871	0.00485116	0.00352919	INHBA/FGF1/TPBG/TREM2/MIR27A/CCL13/MIR23A/PLA2G2A/MIR221	9
GO:0007611	learning or memory	10/178	273/18903	0.00027159	0.00485116	0.00352919	TPBG/TREM2/AGT/PTGS2/EGR2/FOSL1/ATP1A2/RELN/PTPRZ1/S100B	10
GO:0072160	nephron tubule epithelial cell differentiation	3/178	14/18903	0.000276863	0.00491708	0.00357715	YAP1/WWTR1/LIF	3
GO:0018212	peptidyl-tyrosine modification	12/178	382/18903	0.000278837	0.00492401	0.00358219	TREM2/AGT/GPRC5A/IL6/FGF7/CRLF1/SFRP2/RELN/LIF/MIR221/CSF3/ERBB3	12
GO:0071772	response to BMP	8/178	178/18903	0.000289276	0.00505096	0.00367454	TNFAIP6/FZD1/FOXD1/FST/SFRP4/RUNX2/GPC3/SFRP2	8
GO:0071773	cellular response to BMP stimulus	8/178	178/18903	0.000289276	0.00505096	0.00367454	TNFAIP6/FZD1/FOXD1/FST/SFRP4/RUNX2/GPC3/SFRP2	8
GO:0007498	mesoderm development	7/178	136/18903	0.000307027	0.00533096	0.00387824	WLS/YAP1/INHBA/FOXC2/KLF4/ITGB4/SFRP2	7
GO:0035633	maintenance of blood-brain barrier	4/178	35/18903	0.000316836	0.0054707	0.00397991	PTGS2/LAMA2/IL6/CLDN1	4
GO:1990868	response to chemokine	6/178	98/18903	0.000329483	0.00562656	0.00409329	TREM2/CXCL8/CXCL2/CXCL3/CCL13/CXCL1	6
GO:1990869	cellular response to chemokine	6/178	98/18903	0.000329483	0.00562656	0.00409329	TREM2/CXCL8/CXCL2/CXCL3/CCL13/CXCL1	6
GO:0050878	regulation of body fluid levels	12/178	390/18903	0.000336336	0.00570243	0.00414849	FAP/THBS1/KLF4/F3/THBD/TFPI2/PLAUR/IL6/F13A1/PDPN/CLDN1/ENTPD2	12
GO:0050920	regulation of chemotaxis	9/178	230/18903	0.000339972	0.00570243	0.00414849	THBS1/TNFAIP6/MMP28/FGF1/TPBG/F3/TREM2/CXCL8/IL6	9
GO:0030199	collagen fibril organization	5/178	64/18903	0.000340485	0.00570243	0.00414849	COL12A1/COL14A1/FOXC2/TNXB/SFRP2	5
GO:0010273	detoxification of copper ion	3/178	15/18903	0.000343686	0.00570243	0.00414849	MT1E/MT1M/MT1A	3
GO:1990169	stress response to copper ion	3/178	15/18903	0.000343686	0.00570243	0.00414849	MT1E/MT1M/MT1A	3
GO:0060562	epithelial tube morphogenesis	11/178	335/18903	0.000344935	0.00570243	0.00414849	YAP1/STARD13/FOXC2/SOX17/FGF1/FZD1/FOXD1/AGT/GPC3/SOX8/SFRP2	11
GO:0002685	regulation of leukocyte migration	9/178	231/18903	0.000350937	0.00577097	0.00419835	IL1R1/THBS1/TNFAIP6/MMP28/TREM2/CXCL8/APOD/IL6/SELE	9
GO:1905330	regulation of morphogenesis of an epithelium	5/178	65/18903	0.000366076	0.00598823	0.0043564	FGF1/AGT/FGF7/SOX8/LIF	5
GO:0045667	regulation of osteoblast differentiation	7/178	141/18903	0.000382247	0.00622001	0.00452502	YAP1/WWTR1/TNFAIP6/RUNX2/MIR27A/IL6/SFRP2	7
GO:0071219	cellular response to molecule of bacterial origin	9/178	234/18903	0.0003856	0.0062419	0.00454095	SPON2/PLSCR4/TREM2/CXCL8/CXCL2/IL6/CXCL3/CXCL1/CSF3	9
GO:0060675	ureteric bud morphogenesis	5/178	66/18903	0.000393094	0.00633024	0.00460522	FGF1/FOXD1/AGT/GPC3/SOX8	5
GO:0060419	heart growth	6/178	102/18903	0.000408645	0.00651894	0.00474249	YAP1/RUNX1/FOXC2/AGT/MIR23A/PI16	6
GO:0007548	sex differentiation	10/178	288/18903	0.000414603	0.00651894	0.00474249	ANG/INHBA/TNFAIP6/YBX3/FST/PTX3/SOX8/DHH/SFRP2/COL9A3	10
GO:0034599	cellular response to oxidative stress	10/178	288/18903	0.000414603	0.00651894	0.00474249	GPX8/SOD3/FZD1/TREM2/NR4A2/NR4A3/FBLN5/IL6/GJB2/PENK	10
GO:0010715	regulation of extracellular matrix disassembly	3/178	16/18903	0.000420076	0.00651894	0.00474249	FAP/IL6/PDPN	3
GO:0034112	positive regulation of homotypic cell-cell adhesion	3/178	16/18903	0.000420076	0.00651894	0.00474249	PLAUR/IL6/PDPN	3
GO:2000095	regulation of Wnt signaling pathway, planar cell polarity pathway	3/178	16/18903	0.000420076	0.00651894	0.00474249	PLEKHA4/GPC3/SFRP2	3
GO:2000696	regulation of epithelial cell differentiation involved in kidney development	3/178	16/18903	0.000420076	0.00651894	0.00474249	YAP1/WWTR1/LIF	3
GO:0072171	mesonephric tubule morphogenesis	5/178	67/18903	0.000421592	0.00651894	0.00474249	FGF1/FOXD1/AGT/GPC3/SOX8	5
GO:0045639	positive regulation of myeloid cell differentiation	6/178	103/18903	0.000430579	0.0065802	0.00478706	RUNX1/INHBA/TREM2/LIF/MIR221/CSF3	6
GO:0046620	regulation of organ growth	6/178	103/18903	0.000430579	0.0065802	0.00478706	LATS2/YAP1/RUNX1/FOXC2/YBX3/PI16	6
GO:0007565	female pregnancy	8/178	189/18903	0.000432346	0.0065802	0.00478706	THBD/AGT/PTGS2/FOSB/FOSL1/GJB2/ITGB4/LIF	8
GO:0030177	positive regulation of Wnt signaling pathway	7/178	144/18903	0.000434022	0.0065802	0.00478706	WLS/YAP1/DAAM2/PLEKHA4/SFRP4/GPC3/SFRP2	7
GO:0008585	female gonad development	6/178	105/18903	0.000477198	0.00719967	0.00523772	ANG/INHBA/TNFAIP6/FST/PTX3/COL9A3	6
GO:0009595	detection of biotic stimulus	4/178	39/18903	0.000483335	0.00725704	0.00527945	YAP1/FAP/SRPX/TREM2	4
GO:0045598	regulation of fat cell differentiation	7/178	147/18903	0.000491254	0.00734047	0.00534015	YAP1/WWTR1/PTGS2/MIR27A/MEDAG/IL6/SFRP2	7
GO:0030593	neutrophil chemotaxis	6/178	106/18903	0.000501935	0.00746418	0.00543015	TNFAIP6/CXCL8/CXCL2/CXCL3/CCL13/CXCL1	6
GO:1904948	midbrain dopaminergic neuron differentiation	3/178	17/18903	0.00050657	0.00749723	0.00545419	FZD1/NR4A2/SFRP2	3
GO:0030193	regulation of blood coagulation	5/178	70/18903	0.000516481	0.0076077	0.00553456	FAP/THBS1/F3/THBD/PLAUR	5
GO:0032965	regulation of collagen biosynthetic process	4/178	40/18903	0.000533122	0.00777907	0.00565923	CREB3L1/RUNX1/INHBA/IL6	4
GO:1904994	regulation of leukocyte adhesion to vascular endothelial cell	4/178	40/18903	0.000533122	0.00777907	0.00565923	KLF4/IL6/SELE/MIR221	4
GO:0046545	development of primary female sexual characteristics	6/178	109/18903	0.000582177	0.00845516	0.00615109	ANG/INHBA/TNFAIP6/FST/PTX3/COL9A3	6
GO:0046688	response to copper ion	4/178	41/18903	0.000586449	0.00846222	0.00615622	SOD3/MT1E/MT1M/MT1A	4
GO:1900046	regulation of hemostasis	5/178	72/18903	0.000588108	0.00846222	0.00615622	FAP/THBS1/F3/THBD/PLAUR	5
GO:1901343	negative regulation of vasculature development	7/178	152/18903	0.000599878	0.00852846	0.00620441	CREB3L1/THBS1/KLF4/DCN/AGT/ANGPTL7/MIR221	7
GO:0001710	mesodermal cell fate commitment	3/178	18/18903	0.000603688	0.00852846	0.00620441	FOXC2/KLF4/SFRP2	3
GO:0010755	regulation of plasminogen activation	3/178	18/18903	0.000603688	0.00852846	0.00620441	RUNX1/THBS1/PLAUR	3
GO:0061687	detoxification of inorganic compound	3/178	18/18903	0.000603688	0.00852846	0.00620441	MT1E/MT1M/MT1A	3
GO:0010038	response to metal ion	11/178	360/18903	0.000629456	0.00885225	0.00643996	CYBRD1/FIBIN/SOD3/THBS1/MT1E/PTGS2/FOSB/MT1M/MT1A/CLDN1/PENK	11
GO:0014066	regulation of phosphatidylinositol 3-kinase signaling	6/178	111/18903	0.000640971	0.00892793	0.00649502	DCN/TREM2/AGT/RELN/CSF3/ERBB3	6
GO:0045429	positive regulation of nitric oxide biosynthetic process	4/178	42/18903	0.000643454	0.00892793	0.00649502	KLF4/AGT/PTGS2/PTX3	4
GO:0090051	negative regulation of cell migration involved in sprouting angiogenesis	4/178	42/18903	0.000643454	0.00892793	0.00649502	STARD13/THBS1/KLF4/MIR221	4
GO:0098754	detoxification	7/178	154/18903	0.00064833	0.00895559	0.00651514	GPX8/SOD3/MT1E/PTGS2/FBLN5/MT1M/MT1A	7
GO:0048608	reproductive structure development	10/178	306/18903	0.000664018	0.00909144	0.00661397	ANG/INHBA/TNFAIP6/YBX3/FST/PTX3/SOX8/DHH/SFRP2/COL9A3	10
GO:0001736	establishment of planar polarity	5/178	74/18903	0.00066694	0.00909144	0.00661397	GPC4/FZD1/PLEKHA4/GPC3/SFRP2	5
GO:0007164	establishment of tissue polarity	5/178	74/18903	0.00066694	0.00909144	0.00661397	GPC4/FZD1/PLEKHA4/GPC3/SFRP2	5
GO:0010876	lipid localization	13/178	483/18903	0.000679024	0.00921575	0.00670441	TMEM30B/INHBA/THBS1/PLSCR4/TREM2/AGT/PTGS2/MIR27A/APOD/IL6/ABCA8/PLA2G2A/PMP2	13
GO:0045687	positive regulation of glial cell differentiation	4/178	43/18903	0.000704279	0.00949651	0.00690866	EGR2/ASPA/PTPRZ1/LIF	4
GO:0050818	regulation of coagulation	5/178	75/18903	0.000709197	0.00949651	0.00690866	FAP/THBS1/F3/THBD/PLAUR	5
GO:0072078	nephron tubule morphogenesis	5/178	75/18903	0.000709197	0.00949651	0.00690866	FGF1/FOXD1/AGT/GPC3/SOX8	5
GO:0097501	stress response to metal ion	3/178	19/18903	0.000711933	0.00949651	0.00690866	MT1E/MT1M/MT1A	3
GO:0061458	reproductive system development	10/178	310/18903	0.000733622	0.00974401	0.00708871	ANG/INHBA/TNFAIP6/YBX3/FST/PTX3/SOX8/DHH/SFRP2/COL9A3	10
GO:0043281	regulation of cysteine-type endopeptidase activity involved in apoptotic process	8/178	205/18903	0.000738336	0.00976488	0.0071039	THBS1/KLF4/CRYAB/F3/PTGS2/PLAUR/SFRP2/SOX2	8

## Sheet: Sheet 3
ID	Description	GeneRatio	BgRatio	pvalue	p.adjust	qvalue	geneID	Count
GO:0007059	chromosome segregation	32/119	382/18903	3.34086e-27	5.09147e-24	4.42752e-24	ECT2/MND1/NCAPG/BUB1/MAD2L1/CENPF/BUB1B/KIF11/FAM83D/TTK/KIF23/CENPE/NCAPH/SPC25/UBE2C/CDCA2/DLGAP5/ESCO2/KIF4A/MKI67/NUF2/HJURP/SKA3/KIF18A/FANCD2/TEX15/SPC24/KIF14/TOP2A/AURKB/ESPL1/BRIP1	32
GO:0000280	nuclear division	34/119	481/18903	1.78122e-26	1.35729e-23	1.1803e-23	CCNB2/CHEK1/MND1/NCAPG/BUB1/MAD2L1/KIF15/CENPF/BUB1B/KIF11/ASPM/TTK/KIF23/CENPE/NCAPH/SPC25/UBE2C/CDCA2/DLGAP5/ESCO2/KIF4A/MKI67/NUF2/KIF18A/FANCD2/RAD51/TEX15/SPC24/FBXO43/KIF14/TOP2A/AURKB/ESPL1/BRIP1	34
GO:0098813	nuclear chromosome segregation	28/119	321/18903	2.84898e-24	1.44728e-21	1.25855e-21	ECT2/MND1/NCAPG/BUB1/MAD2L1/CENPF/BUB1B/KIF11/FAM83D/TTK/KIF23/CENPE/NCAPH/SPC25/UBE2C/DLGAP5/ESCO2/KIF4A/NUF2/KIF18A/FANCD2/TEX15/SPC24/KIF14/TOP2A/AURKB/ESPL1/BRIP1	28
GO:0140014	mitotic nuclear division	26/119	325/18903	1.36846e-21	5.21384e-19	4.53393e-19	CHEK1/NCAPG/BUB1/MAD2L1/KIF15/CENPF/BUB1B/KIF11/TTK/KIF23/CENPE/NCAPH/SPC25/UBE2C/CDCA2/DLGAP5/ESCO2/KIF4A/MKI67/NUF2/KIF18A/SPC24/FBXO43/KIF14/AURKB/ESPL1	26
GO:0000070	mitotic sister chromatid segregation	21/119	204/18903	8.02424e-20	2.44579e-17	2.12685e-17	NCAPG/BUB1/MAD2L1/CENPF/BUB1B/KIF11/TTK/KIF23/CENPE/NCAPH/SPC25/UBE2C/DLGAP5/ESCO2/KIF4A/NUF2/KIF18A/SPC24/KIF14/AURKB/ESPL1	21
GO:0000819	sister chromatid segregation	22/119	239/18903	1.14662e-19	2.91241e-17	2.53262e-17	NCAPG/BUB1/MAD2L1/CENPF/BUB1B/KIF11/TTK/KIF23/CENPE/NCAPH/SPC25/UBE2C/DLGAP5/ESCO2/KIF4A/NUF2/KIF18A/SPC24/KIF14/TOP2A/AURKB/ESPL1	22
GO:0000075	cell cycle checkpoint signaling	20/119	186/18903	2.7043e-19	5.88765e-17	5.11988e-17	CHEK1/BUB1/MAD2L1/CENPF/BUB1B/CDK1/TTK/TICRR/SPC25/PBK/NUF2/FANCD2/BLM/RAD51/GTSE1/SPC24/DTL/AURKB/CDC45/BRIP1	20
GO:1901987	regulation of cell cycle phase transition	26/119	453/18903	5.56793e-18	1.06069e-15	9.22372e-16	CHEK1/BUB1/MAD2L1/CENPF/BUB1B/CDK1/FAM83D/TTK/TICRR/CENPE/SPC25/UBE2C/DLGAP5/PBK/NUF2/FANCD2/BLM/RAD51/GTSE1/SPC24/KIF14/DTL/AURKB/CDC45/ESPL1/BRIP1	26
GO:0051983	regulation of chromosome segregation	17/119	132/18903	6.93138e-18	1.17371e-15	1.02066e-15	NCAPG/BUB1/MAD2L1/CENPF/BUB1B/TTK/CENPE/NCAPH/SPC25/UBE2C/CDCA2/DLGAP5/MKI67/NUF2/SPC24/AURKB/ESPL1	17
GO:0007093	mitotic cell cycle checkpoint signaling	17/119	141/18903	2.1818e-17	3.32507e-15	2.89146e-15	CHEK1/BUB1/MAD2L1/CENPF/BUB1B/CDK1/TTK/TICRR/SPC25/PBK/NUF2/FANCD2/BLM/GTSE1/SPC24/DTL/AURKB	17
GO:0010948	negative regulation of cell cycle process	22/119	318/18903	5.33783e-17	7.39532e-15	6.43094e-15	CHEK1/BUB1/MAD2L1/CENPF/BUB1B/CDK1/TTK/TICRR/SPC25/PBK/NUF2/FANCD2/BLM/RAD51/GTSE1/SPC24/FBXO43/DTL/AURKB/CDC45/ESPL1/BRIP1	22
GO:0051304	chromosome separation	16/119	135/18903	2.66237e-16	3.3812e-14	2.94028e-14	NCAPG/BUB1/MAD2L1/CENPF/BUB1B/TTK/CENPE/NCAPH/SPC25/UBE2C/DLGAP5/NUF2/SPC24/TOP2A/AURKB/ESPL1	16
GO:1905818	regulation of chromosome separation	15/119	111/18903	3.20013e-16	3.75153e-14	3.26231e-14	NCAPG/BUB1/MAD2L1/CENPF/BUB1B/TTK/CENPE/NCAPH/SPC25/UBE2C/DLGAP5/NUF2/SPC24/AURKB/ESPL1	15
GO:1901988	negative regulation of cell cycle phase transition	20/119	272/18903	4.94102e-16	5.37866e-14	4.67725e-14	CHEK1/BUB1/MAD2L1/CENPF/BUB1B/CDK1/TTK/TICRR/SPC25/PBK/NUF2/FANCD2/BLM/RAD51/GTSE1/SPC24/DTL/AURKB/CDC45/BRIP1	20
GO:0007088	regulation of mitotic nuclear division	15/119	118/18903	8.21149e-16	8.34287e-14	7.25492e-14	CHEK1/BUB1/MAD2L1/CENPF/BUB1B/TTK/SPC25/CDCA2/DLGAP5/MKI67/NUF2/SPC24/FBXO43/AURKB/ESPL1	15
GO:0045786	negative regulation of cell cycle	22/119	405/18903	8.31523e-15	7.92025e-13	6.88742e-13	CHEK1/BUB1/MAD2L1/CENPF/BUB1B/CDK1/TTK/TICRR/SPC25/PBK/NUF2/FANCD2/BLM/RAD51/GTSE1/SPC24/FBXO43/DTL/AURKB/CDC45/ESPL1/BRIP1	22
GO:0030071	regulation of mitotic metaphase/anaphase transition	13/119	92/18903	1.83344e-14	1.58976e-12	1.38245e-12	BUB1/MAD2L1/CENPF/BUB1B/TTK/CENPE/SPC25/UBE2C/DLGAP5/NUF2/SPC24/AURKB/ESPL1	13
GO:0051783	regulation of nuclear division	15/119	145/18903	1.87767e-14	1.58976e-12	1.38245e-12	CHEK1/BUB1/MAD2L1/CENPF/BUB1B/TTK/SPC25/CDCA2/DLGAP5/MKI67/NUF2/SPC24/FBXO43/AURKB/ESPL1	15
GO:0044772	mitotic cell cycle phase transition	23/119	473/18903	2.01826e-14	1.61885e-12	1.40775e-12	CCNB2/CHEK1/BUB1/MAD2L1/CENPF/BUB1B/CDK1/TTK/TICRR/CENPE/SPC25/UBE2C/DLGAP5/NUF2/BLM/MELK/GTSE1/SPC24/KIF14/DTL/AURKB/ESPL1/TRIM71	23
GO:0007091	metaphase/anaphase transition of mitotic cell cycle	13/119	95/18903	2.82094e-14	2.0472e-12	1.78023e-12	BUB1/MAD2L1/CENPF/BUB1B/TTK/CENPE/SPC25/UBE2C/DLGAP5/NUF2/SPC24/AURKB/ESPL1	13
GO:1902099	regulation of metaphase/anaphase transition of cell cycle	13/119	95/18903	2.82094e-14	2.0472e-12	1.78023e-12	BUB1/MAD2L1/CENPF/BUB1B/TTK/CENPE/SPC25/UBE2C/DLGAP5/NUF2/SPC24/AURKB/ESPL1	13
GO:0010965	regulation of mitotic sister chromatid separation	13/119	98/18903	4.2763e-14	2.83351e-12	2.46401e-12	BUB1/MAD2L1/CENPF/BUB1B/TTK/CENPE/SPC25/UBE2C/DLGAP5/NUF2/SPC24/AURKB/ESPL1	13
GO:0044784	metaphase/anaphase transition of cell cycle	13/119	98/18903	4.2763e-14	2.83351e-12	2.46401e-12	BUB1/MAD2L1/CENPF/BUB1B/TTK/CENPE/SPC25/UBE2C/DLGAP5/NUF2/SPC24/AURKB/ESPL1	13
GO:0051306	mitotic sister chromatid separation	13/119	101/18903	6.39301e-14	4.05956e-12	3.53017e-12	BUB1/MAD2L1/CENPF/BUB1B/TTK/CENPE/SPC25/UBE2C/DLGAP5/NUF2/SPC24/AURKB/ESPL1	13
GO:1901990	regulation of mitotic cell cycle phase transition	20/119	354/18903	7.50954e-14	4.57782e-12	3.98085e-12	CHEK1/BUB1/MAD2L1/CENPF/BUB1B/CDK1/TTK/TICRR/CENPE/SPC25/UBE2C/DLGAP5/NUF2/BLM/GTSE1/SPC24/KIF14/DTL/AURKB/ESPL1	20
GO:0140013	meiotic nuclear division	16/119	194/18903	8.66803e-14	5.0808e-12	4.41824e-12	CCNB2/MND1/BUB1/BUB1B/ASPM/TTK/NCAPH/NUF2/KIF18A/FANCD2/RAD51/TEX15/FBXO43/TOP2A/ESPL1/BRIP1	16
GO:0033045	regulation of sister chromatid segregation	13/119	107/18903	1.37513e-13	7.76182e-12	6.74964e-12	BUB1/MAD2L1/CENPF/BUB1B/TTK/CENPE/SPC25/UBE2C/DLGAP5/NUF2/SPC24/AURKB/ESPL1	13
GO:0051784	negative regulation of nuclear division	11/119	63/18903	1.7959e-13	9.77485e-12	8.50016e-12	CHEK1/BUB1/MAD2L1/CENPF/BUB1B/TTK/SPC25/NUF2/SPC24/FBXO43/AURKB	11
GO:0051321	meiotic cell cycle	18/119	285/18903	2.23275e-13	1.17335e-11	1.02034e-11	CCNB2/MND1/BUB1/BUB1B/EXO1/ASPM/TTK/NCAPH/NUF2/KIF18A/FANCD2/RAD51/TEX15/FBXO43/TOP2A/XRCC2/ESPL1/BRIP1	18
GO:0045930	negative regulation of mitotic cell cycle	17/119	246/18903	2.53524e-13	1.2879e-11	1.11995e-11	CHEK1/BUB1/MAD2L1/CENPF/BUB1B/CDK1/TTK/TICRR/SPC25/PBK/NUF2/FANCD2/BLM/GTSE1/SPC24/DTL/AURKB	17
GO:1903046	meiotic cell cycle process	16/119	212/18903	3.45182e-13	1.69696e-11	1.47567e-11	CCNB2/MND1/BUB1/BUB1B/ASPM/TTK/NCAPH/NUF2/KIF18A/FANCD2/RAD51/TEX15/FBXO43/TOP2A/ESPL1/BRIP1	16
GO:1901991	negative regulation of mitotic cell cycle phase transition	15/119	194/18903	1.39282e-12	6.63331e-11	5.76829e-11	CHEK1/BUB1/MAD2L1/CENPF/BUB1B/CDK1/TTK/TICRR/SPC25/NUF2/BLM/GTSE1/SPC24/DTL/AURKB	15
GO:0045839	negative regulation of mitotic nuclear division	10/119	56/18903	1.85732e-12	8.57743e-11	7.45889e-11	CHEK1/BUB1/MAD2L1/CENPF/BUB1B/TTK/SPC25/NUF2/SPC24/AURKB	10
GO:1902850	microtubule cytoskeleton organization involved in mitosis	14/119	163/18903	1.93385e-12	8.66818e-11	7.53781e-11	MAD2L1/KIF15/KIF11/TTK/KIF23/CENPE/CENPA/SPC25/DLGAP5/KIF4A/NUF2/SAPCD2/AURKB/ESPL1	14
GO:0033044	regulation of chromosome organization	16/119	252/18903	4.89729e-12	2.13242e-10	1.85434e-10	NCAPG/BUB1/MAD2L1/CENPF/BUB1B/TTK/CENPE/NCAPH/SPC25/UBE2C/DLGAP5/NUF2/SPC24/TOP2A/AURKB/ESPL1	16
GO:0007094	mitotic spindle assembly checkpoint signaling	9/119	46/18903	1.03516e-11	4.15152e-10	3.61014e-10	BUB1/MAD2L1/CENPF/BUB1B/TTK/SPC25/NUF2/SPC24/AURKB	9
GO:0071173	spindle assembly checkpoint signaling	9/119	46/18903	1.03516e-11	4.15152e-10	3.61014e-10	BUB1/MAD2L1/CENPF/BUB1B/TTK/SPC25/NUF2/SPC24/AURKB	9
GO:0071174	mitotic spindle checkpoint signaling	9/119	46/18903	1.03516e-11	4.15152e-10	3.61014e-10	BUB1/MAD2L1/CENPF/BUB1B/TTK/SPC25/NUF2/SPC24/AURKB	9
GO:0031577	spindle checkpoint signaling	9/119	47/18903	1.27362e-11	4.9769e-10	4.32789e-10	BUB1/MAD2L1/CENPF/BUB1B/TTK/SPC25/NUF2/SPC24/AURKB	9
GO:0045841	negative regulation of mitotic metaphase/anaphase transition	9/119	48/18903	1.55932e-11	5.941e-10	5.16626e-10	BUB1/MAD2L1/CENPF/BUB1B/TTK/SPC25/NUF2/SPC24/AURKB	9
GO:1902100	negative regulation of metaphase/anaphase transition of cell cycle	9/119	50/18903	2.30513e-11	8.56832e-10	7.45097e-10	BUB1/MAD2L1/CENPF/BUB1B/TTK/SPC25/NUF2/SPC24/AURKB	9
GO:2001251	negative regulation of chromosome organization	11/119	97/18903	2.42603e-11	8.80301e-10	7.65505e-10	BUB1/MAD2L1/CENPF/BUB1B/TTK/SPC25/NUF2/SPC24/TOP2A/AURKB/ESPL1	11
GO:0033046	negative regulation of sister chromatid segregation	9/119	51/18903	2.78442e-11	9.42989e-10	8.20019e-10	BUB1/MAD2L1/CENPF/BUB1B/TTK/SPC25/NUF2/SPC24/AURKB	9
GO:0033048	negative regulation of mitotic sister chromatid segregation	9/119	51/18903	2.78442e-11	9.42989e-10	8.20019e-10	BUB1/MAD2L1/CENPF/BUB1B/TTK/SPC25/NUF2/SPC24/AURKB	9
GO:2000816	negative regulation of mitotic sister chromatid separation	9/119	51/18903	2.78442e-11	9.42989e-10	8.20019e-10	BUB1/MAD2L1/CENPF/BUB1B/TTK/SPC25/NUF2/SPC24/AURKB	9
GO:0045132	meiotic chromosome segregation	11/119	101/18903	3.79584e-11	1.25758e-09	1.09358e-09	MND1/BUB1/BUB1B/TTK/NCAPH/NUF2/FANCD2/TEX15/TOP2A/ESPL1/BRIP1	11
GO:0051985	negative regulation of chromosome segregation	9/119	53/18903	4.01357e-11	1.27431e-09	1.10813e-09	BUB1/MAD2L1/CENPF/BUB1B/TTK/SPC25/NUF2/SPC24/AURKB	9
GO:1905819	negative regulation of chromosome separation	9/119	53/18903	4.01357e-11	1.27431e-09	1.10813e-09	BUB1/MAD2L1/CENPF/BUB1B/TTK/SPC25/NUF2/SPC24/AURKB	9
GO:0033047	regulation of mitotic sister chromatid segregation	9/119	56/18903	6.75405e-11	2.10065e-09	1.82671e-09	BUB1/MAD2L1/CENPF/BUB1B/TTK/SPC25/NUF2/SPC24/AURKB	9
GO:0090068	positive regulation of cell cycle process	15/119	260/18903	9.21807e-11	2.80967e-09	2.44327e-09	ECT2/NCAPG/MAD2L1/PLK4/CDK1/FAM83D/KIF23/NCAPH/UBE2C/DLGAP5/PBK/KIF14/DTL/AURKB/ESPL1	15
GO:0045787	positive regulation of cell cycle	17/119	362/18903	1.19138e-10	3.56011e-09	3.09586e-09	ECT2/CHEK1/NCAPG/MAD2L1/PLK4/CDK1/FAM83D/KIF23/NCAPH/UBE2C/DLGAP5/PBK/KIF14/DTL/AURKB/ESPL1/CCNYL2	17
GO:0007051	spindle organization	13/119	195/18903	3.01092e-10	8.82431e-09	7.67358e-09	CCNB2/KIF15/KIF11/ASPM/TTK/KIF23/CENPE/SPC25/DLGAP5/KIF4A/NUF2/AURKB/ESPL1	13
GO:0031570	DNA integrity checkpoint signaling	11/119	129/18903	5.48331e-10	1.57671e-08	1.3711e-08	CHEK1/CDK1/TICRR/PBK/FANCD2/BLM/RAD51/GTSE1/DTL/CDC45/BRIP1	11
GO:0000077	DNA damage checkpoint signaling	10/119	121/18903	4.68862e-09	1.32323e-07	1.15068e-07	CHEK1/CDK1/TICRR/PBK/FANCD2/BLM/RAD51/GTSE1/DTL/BRIP1	10
GO:0007052	mitotic spindle organization	10/119	133/18903	1.17392e-08	3.25283e-07	2.82865e-07	KIF15/KIF11/TTK/KIF23/CENPE/SPC25/DLGAP5/KIF4A/NUF2/AURKB	10
GO:0042770	signal transduction in response to DNA damage	11/119	181/18903	1.96792e-08	5.35555e-07	4.65716e-07	CHEK1/CDK1/TICRR/PBK/FANCD2/BLM/RAD51/GTSE1/DTL/BRIP1/TWIST1	11
GO:0070192	chromosome organization involved in meiotic cell cycle	8/119	76/18903	2.56627e-08	6.86139e-07	5.96664e-07	MND1/BUB1/BUB1B/NCAPH/FANCD2/RAD51/TEX15/BRIP1	8
GO:0044773	mitotic DNA damage checkpoint signaling	8/119	81/18903	4.26458e-08	1.12056e-06	9.74429e-07	CHEK1/CDK1/TICRR/PBK/FANCD2/BLM/GTSE1/DTL	8
GO:0044839	cell cycle G2/M phase transition	10/119	157/18903	5.73848e-08	1.48228e-06	1.28898e-06	CCNB2/CHEK1/CENPF/CDK1/TICRR/BLM/MELK/KIF14/DTL/AURKB	10
GO:0000281	mitotic cytokinesis	8/119	85/18903	6.24868e-08	1.56114e-06	1.35756e-06	ECT2/KIF20A/KIF23/CENPA/KIF4A/AURKB/CEP55/ESPL1	8
GO:0044774	mitotic DNA integrity checkpoint signaling	8/119	85/18903	6.24868e-08	1.56114e-06	1.35756e-06	CHEK1/CDK1/TICRR/PBK/FANCD2/BLM/GTSE1/DTL	8
GO:0010639	negative regulation of organelle organization	14/119	366/18903	7.64317e-08	1.87874e-06	1.63374e-06	CHEK1/BUB1/MAD2L1/CENPF/BUB1B/TTK/SPC25/NUF2/SPC24/FBXO43/TOP2A/AURKB/ESPL1/MPV17L	14
GO:0050000	chromosome localization	8/119	89/18903	8.98052e-08	2.17243e-06	1.88914e-06	CENPF/FAM83D/CENPE/DLGAP5/NUF2/KIF18A/KIF14/AURKB	8
GO:0010389	regulation of G2/M transition of mitotic cell cycle	8/119	99/18903	2.0661e-07	4.91989e-06	4.27832e-06	CHEK1/CENPF/CDK1/TICRR/BLM/KIF14/DTL/AURKB	8
GO:0008608	attachment of spindle microtubules to kinetochore	6/119	43/18903	2.76333e-07	6.44758e-06	5.60679e-06	ECT2/CENPE/SPC25/NUF2/SPC24/AURKB	6
GO:0051383	kinetochore organization	5/119	23/18903	2.79226e-07	6.44758e-06	5.60679e-06	CENPF/CENPE/CENPA/DLGAP5/NUF2	5
GO:0000086	G2/M transition of mitotic cell cycle	9/119	142/18903	2.83471e-07	6.44791e-06	5.60707e-06	CHEK1/CENPF/CDK1/TICRR/BLM/MELK/KIF14/DTL/AURKB	9
GO:0000910	cytokinesis	10/119	187/18903	2.95415e-07	6.62077e-06	5.75739e-06	ECT2/PLK4/KIF20A/KIF23/CENPA/KIF4A/KIF14/AURKB/CEP55/ESPL1	10
GO:0051310	metaphase plate congression	7/119	71/18903	3.12595e-07	6.90427e-06	6.00392e-06	CENPF/FAM83D/CENPE/NUF2/KIF18A/KIF14/AURKB	7
GO:1902749	regulation of cell cycle G2/M phase transition	8/119	110/18903	4.66828e-07	1.01635e-05	8.83814e-06	CHEK1/CENPF/CDK1/TICRR/BLM/KIF14/DTL/AURKB	8
GO:0061640	cytoskeleton-dependent cytokinesis	8/119	113/18903	5.73998e-07	1.23207e-05	1.07141e-05	ECT2/KIF20A/KIF23/CENPA/KIF4A/AURKB/CEP55/ESPL1	8
GO:1905820	positive regulation of chromosome separation	5/119	27/18903	6.5657e-07	1.38974e-05	1.20851e-05	NCAPG/NCAPH/DLGAP5/AURKB/ESPL1	5
GO:0051303	establishment of chromosome localization	7/119	82/18903	8.44067e-07	1.76213e-05	1.53234e-05	CENPF/FAM83D/CENPE/NUF2/KIF18A/KIF14/AURKB	7
GO:0140694	non-membrane-bounded organelle assembly	13/119	386/18903	9.70551e-07	1.99881e-05	1.73816e-05	CCNB2/KIF15/CENPF/PLK4/KIF11/ASPM/KIF23/CENPE/CENPA/DLGAP5/KIF4A/CEP152/AURKB	13
GO:0006310	DNA recombination	12/119	332/18903	1.24849e-06	2.53693e-05	2.2061e-05	CHEK1/MND1/EXO1/PARPBP/FANCD2/BLM/RAD51/TEX15/TOP2A/XRCC2/CDC45/BRIP1	12
GO:0051231	spindle elongation	4/119	14/18903	1.42346e-06	2.8544e-05	2.48218e-05	KIF11/KIF23/KIF4A/AURKB	4
GO:0034508	centromere complex assembly	5/119	32/18903	1.59712e-06	3.16105e-05	2.74883e-05	CENPF/CENPE/CENPA/DLGAP5/HJURP	5
GO:0007127	meiosis I	8/119	131/18903	1.76625e-06	3.45099e-05	3.00096e-05	CCNB2/MND1/FANCD2/RAD51/TEX15/TOP2A/ESPL1/BRIP1	8
GO:0007095	mitotic G2 DNA damage checkpoint signaling	5/119	34/18903	2.18478e-06	4.2147e-05	3.66508e-05	CHEK1/CDK1/TICRR/BLM/DTL	5
GO:0061982	meiosis I cell cycle process	8/119	137/18903	2.47325e-06	4.71153e-05	4.09713e-05	CCNB2/MND1/FANCD2/RAD51/TEX15/TOP2A/ESPL1/BRIP1	8
GO:0010972	negative regulation of G2/M transition of mitotic cell cycle	6/119	64/18903	3.05171e-06	5.74164e-05	4.9929e-05	CHEK1/CDK1/TICRR/BLM/DTL/AURKB	6
GO:0006302	double-strand break repair	11/119	300/18903	3.08933e-06	5.74164e-05	4.9929e-05	CHEK1/PARPBP/ESCO2/FANCD2/BLM/RAD51/TEX15/XRCC2/CDC45/BRIP1/TWIST1	11
GO:0051302	regulation of cell division	9/119	190/18903	3.23718e-06	5.94392e-05	5.16881e-05	ECT2/PLK4/ASPM/KIF20A/KIF23/ORC6/BLM/KIF14/AURKB	9
GO:1902750	negative regulation of cell cycle G2/M phase transition	6/119	66/18903	3.66059e-06	6.64136e-05	5.77529e-05	CHEK1/CDK1/TICRR/BLM/DTL/AURKB	6
GO:0051382	kinetochore assembly	4/119	18/18903	4.26747e-06	7.56235e-05	6.57618e-05	CENPF/CENPE/CENPA/DLGAP5	4
GO:0051782	negative regulation of cell division	4/119	18/18903	4.26747e-06	7.56235e-05	6.57618e-05	ASPM/ORC6/BLM/AURKB	4
GO:0071459	protein localization to chromosome, centromeric region	5/119	43/18903	7.22399e-06	0.000126544	0.000110042	BUB1B/CDK1/TTK/CENPA/AURKB	5
GO:0006260	DNA replication	10/119	286/18903	1.33913e-05	0.000231912	0.00020167	CHEK1/CDK1/TICRR/ESCO2/ORC6/BLM/RAD51/DTL/MCM10/CDC45	10
GO:0044818	mitotic G2/M transition checkpoint	5/119	50/18903	1.53517e-05	0.000262877	0.000228597	CHEK1/CDK1/TICRR/BLM/DTL	5
GO:0051225	spindle assembly	7/119	128/18903	1.65377e-05	0.000280038	0.000243519	CCNB2/KIF15/KIF11/ASPM/KIF23/KIF4A/AURKB	7
GO:0051307	meiotic chromosome separation	4/119	26/18903	2.00532e-05	0.000335836	0.000292041	TTK/NCAPH/TOP2A/ESPL1	4
GO:0051656	establishment of organelle localization	12/119	437/18903	2.03943e-05	0.000337835	0.00029378	MAD2L1/CENPF/FAM83D/CENPE/CENPA/NUF2/KIF18A/SLIT1/SAPCD2/KIF14/AURKB/ESPL1	12
GO:0007080	mitotic metaphase plate congression	5/119	57/18903	2.92917e-05	0.000480007	0.000417411	CENPE/NUF2/KIF18A/KIF14/AURKB	5
GO:0032465	regulation of cytokinesis	6/119	95/18903	3.01894e-05	0.000489454	0.000425626	ECT2/PLK4/KIF20A/KIF23/KIF14/AURKB	6
GO:0007131	reciprocal meiotic recombination	5/119	58/18903	3.18948e-05	0.000506331	0.000440303	MND1/FANCD2/RAD51/TOP2A/BRIP1	5
GO:0140527	reciprocal homologous recombination	5/119	58/18903	3.18948e-05	0.000506331	0.000440303	MND1/FANCD2/RAD51/TOP2A/BRIP1	5
GO:0051653	spindle localization	5/119	59/18903	3.46738e-05	0.000544773	0.000473732	MAD2L1/ASPM/CENPA/SAPCD2/ESPL1	5
GO:0051256	mitotic spindle midzone assembly	3/119	11/18903	3.86866e-05	0.000601616	0.000523162	KIF23/KIF4A/AURKB	3
GO:0000022	mitotic spindle elongation	3/119	12/18903	5.13452e-05	0.000784865	0.000682515	KIF23/KIF4A/AURKB	3
GO:0045143	homologous chromosome segregation	5/119	64/18903	5.15003e-05	0.000784865	0.000682515	MND1/FANCD2/TEX15/ESPL1/BRIP1	5
GO:0007143	female meiotic nuclear division	4/119	33/18903	5.30522e-05	0.000800511	0.00069612	CCNB2/TTK/NCAPH/TOP2A	4
GO:0035825	homologous recombination	5/119	65/18903	5.55133e-05	0.000829434	0.000721272	MND1/FANCD2/RAD51/TOP2A/BRIP1	5
GO:0051255	spindle midzone assembly	3/119	14/18903	8.41746e-05	0.00124546	0.00108304	KIF23/KIF4A/AURKB	3
GO:0034502	protein localization to chromosome	6/119	115/18903	8.82523e-05	0.00129324	0.00112459	BUB1B/CDK1/TTK/CENPA/ESCO2/AURKB	6
GO:0006270	DNA replication initiation	4/119	38/18903	9.34049e-05	0.00134292	0.00116779	TICRR/ORC6/MCM10/CDC45	4
GO:0040001	establishment of mitotic spindle localization	4/119	38/18903	9.34049e-05	0.00134292	0.00116779	MAD2L1/CENPA/SAPCD2/ESPL1	4
GO:0000724	double-strand break repair via homologous recombination	7/119	169/18903	9.74984e-05	0.00138867	0.00120758	CHEK1/PARPBP/BLM/RAD51/TEX15/XRCC2/CDC45	7
GO:0090307	mitotic spindle assembly	5/119	74/18903	0.000103495	0.00146043	0.00126998	KIF15/KIF11/KIF23/KIF4A/AURKB	5
GO:0000212	meiotic spindle organization	3/119	15/18903	0.000104735	0.00146437	0.00127341	CCNB2/ASPM/ESPL1	3
GO:0000725	recombinational repair	7/119	173/18903	0.00011283	0.00156321	0.00135936	CHEK1/PARPBP/BLM/RAD51/TEX15/XRCC2/CDC45	7
GO:0032506	cytokinetic process	4/119	40/18903	0.000114527	0.00157243	0.00136738	ECT2/KIF20A/AURKB/CEP55	4
GO:1901989	positive regulation of cell cycle phase transition	6/119	122/18903	0.000122335	0.00166463	0.00144755	CDK1/FAM83D/UBE2C/DLGAP5/DTL/ESPL1	6
GO:0036297	interstrand cross-link repair	4/119	41/18903	0.000126295	0.0017033	0.00148118	NEIL3/FANCI/FANCD2/RAD51	4
GO:0034501	protein localization to kinetochore	3/119	18/18903	0.00018526	0.00243393	0.00211654	CDK1/TTK/AURKB	3
GO:1901970	positive regulation of mitotic sister chromatid separation	3/119	18/18903	0.00018526	0.00243393	0.00211654	DLGAP5/AURKB/ESPL1	3
GO:1903083	protein localization to condensed chromosome	3/119	18/18903	0.00018526	0.00243393	0.00211654	CDK1/TTK/AURKB	3
GO:0032467	positive regulation of cytokinesis	4/119	46/18903	0.000198635	0.00258735	0.00224995	ECT2/KIF23/KIF14/AURKB	4
GO:0007098	centrosome cycle	6/119	135/18903	0.000212775	0.00274804	0.00238968	CHEK1/PLK4/KIF11/CDK1/CEP152/XRCC2	6
GO:1901978	positive regulation of cell cycle checkpoint	3/119	19/18903	0.000218988	0.00280452	0.00243879	MAD2L1/PBK/AURKB	3
GO:1901976	regulation of cell cycle checkpoint	4/119	48/18903	0.000234566	0.00297899	0.00259051	MAD2L1/PBK/RAD51/AURKB	4
GO:0030261	chromosome condensation	4/119	49/18903	0.000254182	0.00320143	0.00278395	NCAPG/CDK1/NCAPH/TOP2A	4
GO:0010212	response to ionizing radiation	6/119	143/18903	0.000290414	0.0036278	0.00315472	ECT2/TICRR/FANCD2/BLM/RAD51/XRCC2	6
GO:0051315	attachment of mitotic spindle microtubules to kinetochore	3/119	21/18903	0.000297823	0.0036901	0.00320889	CENPE/NUF2/AURKB	3
GO:0032508	DNA duplex unwinding	5/119	93/18903	0.000303655	0.00373201	0.00324534	BLM/RAD51/TOP2A/CDC45/BRIP1	5
GO:0007129	homologous chromosome pairing at meiosis	4/119	52/18903	0.000320097	0.00390263	0.00339371	MND1/FANCD2/TEX15/BRIP1	4
GO:0006268	DNA unwinding involved in DNA replication	3/119	22/18903	0.000343268	0.00415191	0.00361048	BLM/RAD51/CDC45	3
GO:0061351	neural precursor cell proliferation	6/119	149/18903	0.000362028	0.00434434	0.00377782	ASPM/MELK/KIF14/TRIM71/HHIP/INSM1	6
GO:0051293	establishment of spindle localization	4/119	54/18903	0.000370323	0.00440916	0.00383419	MAD2L1/CENPA/SAPCD2/ESPL1	4
GO:0031023	microtubule organizing center organization	6/119	150/18903	0.000375199	0.00443259	0.00385456	CHEK1/PLK4/KIF11/CDK1/CEP152/XRCC2	6
GO:0032392	DNA geometric change	5/119	99/18903	0.000405563	0.00475445	0.00413445	BLM/RAD51/TOP2A/CDC45/BRIP1	5
GO:1901992	positive regulation of mitotic cell cycle phase transition	5/119	100/18903	0.000424784	0.00494177	0.00429734	CDK1/UBE2C/DLGAP5/DTL/ESPL1	5
GO:0051984	positive regulation of chromosome segregation	3/119	25/18903	0.000505663	0.00583811	0.0050768	NCAPG/NCAPH/AURKB	3
GO:0007292	female gamete generation	6/119	159/18903	0.000511377	0.00585969	0.00509556	CCNB2/ASPM/TTK/NCAPH/TOP2A/LGR5	6
GO:0071103	DNA conformation change	5/119	106/18903	0.000554928	0.00631127	0.00548825	BLM/RAD51/TOP2A/CDC45/BRIP1	5
GO:0009314	response to radiation	10/119	452/18903	0.000577432	0.00651857	0.00566852	ECT2/CHEK1/TICRR/PBK/FANCD2/BLM/RAD51/DTL/AURKB/XRCC2	10
GO:0006261	DNA-templated DNA replication	6/119	166/18903	0.000641692	0.00719073	0.00625302	TICRR/ORC6/BLM/RAD51/MCM10/CDC45	6
GO:0007062	sister chromatid cohesion	4/119	63/18903	0.000667805	0.00742872	0.00645998	BUB1/BUB1B/ESCO2/ESPL1	4
GO:0065004	protein-DNA complex assembly	7/119	242/18903	0.000858576	0.00948167	0.00824521	CENPF/CENPE/CENPA/DLGAP5/HJURP/RAD51/CDC45	7
